# Supplementary material for: Socioeconomic status and risk of gestational diabetes mellitus among pregnant women in Zunyi, China
Source: PeerJ. 2025 Aug 28;13:e19782. doi: 10.7717/peerj.19782 (PMC12399077; doi:10.7717/peerj.19782)
Supplement: Supplemental Information 1 [file peerj-13-19782-s001.xlsx]

## Sheet: Sheet4
No.	Gestational Week(s)	Low, Macrosomia, Normal	Preterm (1 = Yes)	Macrosomia	Restricted + Low Birth Weight	Gestational Hypertension (2 = Yes)	Diabetes (2 = Yes)	Maternal Age	Maternal Age（Category）	Maternal Ethnicity	Maternal Education Level	What is your husband's current education level?	BMI	BMI （Category）	What is your husband's current occupation?	Maternal Occupation	How many people currently live in your household? (persons)	Is this pregnancy a planned pregnancy?	Primipara (1 = Yes)	What is the type of housing structure you currently live in?	Did you smoke before this pregnancy?	Do you smoke?	How often are you exposed to passive smoking daily? (1 = None)	What was your exercise frequency in the months prior to this pregnancy?	Alcohol Consumption (1 = None, 2 = Yes)	What was your total household income last year?	Have you ever been diagnosed with diabetes by your doctor？	Have you ever been diagnosed with high blood pressure by your doctor	Have you ever been diagnosed with high blood pressure by your doctor	Diploma in synthetic income	History of gestational diabetes mellitus
1	1	0	1	1	1	1	1	24	1	1	4	2	45.6658	3	1	3	1	1	2	2	1	1	1	4	1	2	1	1	1	3	1
2	3	0	1	1	1	2	2	23	1	1	2	2	28.251	3	3	3	3	1	1	1	1	1	1	4	1	3	1	1	1	1	1
3	3	0	1	1	1	1	2	31	2	1	3	3	23.4375	2	3	4	2	2	1	1	1	1	2	4	1	2	2	1	2	1	1
4	3	0	1	1	1	2	2	31	2	1	2	2	30.0801	3	2	3	2	2	1	1	1	1	1	1	1	2	2	2	1	1	1
5	2	0	1	1	1	1	1	24	1	1	2	2	20.8889	2	2	3	2	1	1	2	1	1	1	4	1	4	1	1	1	2	1
6	3	0	1	1	1	1	1	17	1	1	4	4	23.8281	2	3	1	1	2	2	1	1	1	2	1	1	3	1	1	1	3	1
7	3	0	1	1	1	2	1	19	1	1	4	4	27.3438	3	3	1	1	2	2	2	1	1	2	1	1	3	1	1	1	3	1
8	1	0	1	1	1	1	1	26	2	1	4	2	20.83	2	2	2	3	1	2	1	1	1	1	1	1	3	1	1	1	3	1
9	3	0	1	1	1	1	1	26	2	1	3	3	19.7055	2	2	4	3	2	1	1	1	1	2	4	1	3	1	1	1	1	1
10	3	0	1	1	1	1	1	19	1	1	4	4	20.7031	2	1	1	2	2	1	1	1	1	1	1	1	1	1	1	1	3	1
11	3	0	1	1	1	1	1	21	1	1	2	2	17.7458	1	2	3	1	2	2	1	1	1	1	1	1	2	1	1	1	1	1
12	2	0	1	1	1	1	1	34	2	1	4	4	21.0772	2	2	2	2	1	1	1	1	1	1	4	1	2	1	1	1	3	1
13	3	1	1	1	2	1	1	25	1	1	2	2	23.0681	2	4	4	3	1	1	1	1	1	1	1	1	2	1	1	1	1	1
14	1	0	1	1	1	1	1	31	2	1	1	2	29.2969	3	2	2	3	2	1	1	1	1	2	4	1	1	1	1	1	1	1
15	2	0	1	1	1	2	1	30	2	1	2	2	21.3593	2	2	3	3	1	1	1	1	1	1	4	1	1	1	1	1	1	1
16	2	0	1	1	1	1	1	22	1	2	3	2	19.2277	2	3	3	4	2	2	2	1	1	1	4	1	1	1	1	1	1	1
17	3	0	1	1	1	2	1	26	2	1	2	2	25.8876	3	4	4	2	2	1	1	1	1	1	2	1	2	1	1	1	1	1
18	3	0	1	1	1	1	2	32	2	1	4	4	19.563	2	2	2	2	2	1	1	1	1	1	2	1	3	2	1	1	3	1
19	3	0	1	1	1	1	2	23	1	1	3	3	27.3333	3	3	3	3	2	2	1	1	1	1	1	1	1	1	1	1	1	1
20	3	0	1	1	1	1	1	25	1	1	3	3	20.6612	2	2	4	2	2	1	1	1	1	1	4	1	4	1	1	1	2	1
21	3	0	1	1	1	1	1	25	1	1	2	2	22.806	2	2	3	2	2	1	1	1	1	1	1	1	2	1	1	1	1	1
22	1	0	1	1	1	1	1	18	1	1	4	4	21.7778	2	1	1	3	2	2	2	1	1	2	4	1	3	1	1	1	3	1
23	3	0	1	1	1	1	1	31	2	1	4	4	22.0317	2	3	1	2	2	1	1	1	1	2	1	2	3	1	1	1	3	1
24	3	0	1	1	1	1	1	24	1	1	2	2	23.3091	2	3	4	3	2	2	1	1	1	2	1	1	2	1	1	1	1	1
25	3	0	1	1	1	1	1	23	1	1	2	2	17.7096	1	3	3	4	1	1	1	1	1	1	1		2	1	1	1	1	1
26	3	0	1	1	1	2	1	23	1	1	2	2	20.83	2	3	3	3	1	1	1	1	1	1	4	1	3	1	1	1	1	1
27	3	0	1	1	1	1	1	38	3	1	2	1	21.3593	2	4	4	2	2	1	1	1	1	1	2	1	2	1	1	1	1	1
28	2	0	1	1	1	1	1	31	2	1	4	4	26.4381	3	2	2	2	1	1	2	1	1	2	4	1	3	1	1	1	3	1
29	3	0	1	1	1	1	1	15	1	1	4	4	21.6311	2	3	1	2	2	1	1	1	1	2	1	1	3	1	1	1	3	1
30	1	0	1	1	1	1	1	23	1	1	2	2	21.6441	2	3	3	5	1	2	1	1	1	2	1	1	4	1	1	1	2	1
31	1	0	1	1	1	1	1	31	2	1	3	2	23.3091	2	4	2	2	1	1	2	1	1	1	4	1	2	1	1	1	1	1
32	3	0	1	1	1	1	1	28	2	1	4	4	19.0443	2	3	2	1	2	2	1	1	1	1	1	1	3	1	1	1	3	1
33	1	0	1	1	1	1	1	24	1	1	2	2	19.563	2	3	3	1	1	1	2	1	1	1	1	1	2	1	1	1	1	1
34	3	0	1	1	1	1	1	41	3	1	2	3	20.0288	2	4	4	4	1	1	1	1	1	1	4	1	3	1	1	1	1	1
35	3	0	1	1	1	1	1	22	1	1	4	3	21.3593	2	3	2	1	1	2	1	1	1	1	1	1	3	1	1	1	3	1
36	3	0	1	1	1	1	1	37	3	1	2	2	32.4219	3	4	4	3	2	1	2	1	1	1	1	1	2	1	1	1	1	1
37	1	0	1	1	1	2	1	20	1	1	2	3	22.6562	2	2	3	4	1	1	2	1	1	2	1	1	3	1	1	1	1	1
38	3	0	1	1	1	1	1	28	2	1	4	4	21.5045	2	3	2	1	2	2	1	1	1	2	1	1	3	1	1	1	3	1
39	3	0	1	1	1	1	1	11	1	1	4	2	22.1003	2	3	1	1	1	2	2	1	1	2	4	1	1	1	1	1	3	1
40	2	0	2	1	1	1	2	24	1	1	2	2	18.369	1	3	4	5	1	1	1	1	1	1	1	1	3	1	1	1	1	1
41	3	0	1	1	1	1	1	30	2	1	2	2	25.462	3	2	3	4	1	1	1	1	1	2	3	1	3	1	1	1	1	1
42	3	0	1	1	1	2	2	21	1	1	2	2	18.4425	1	3	4	4	2	2	1	1	1	1	4	1	3	1	1	1	1	1
43	3	0	1	1	1	1	1	25	1	2	4	4	18.8189	2	1	3	1	1	2	2	1	1	1	4	1	3	1	1	1	3	1
44	3	0	1	1	1	1	1	24	1	1	2	2	21.4844	2	4	4	3	2	2	1	1	1	2	1	1	2	1	1	1	1	1
45	1	0	1	1	1	1	2	21	1	1	3	3	16.4062	1	2	2	4	1	2	1	1	1	1	4	1	3	1	1	1	1	1
46	3	0	1	1	1	1	1	26	2	1	4	4	17.7154	1	2	3	1	2	2	2	1	1	1	1	1	2	1	1	1	3	1
47	3	0	2	1	1	1	1	19	1	1	3	4	21.7993	2	2	3	2	1	2	1	1	1	1	4	1	2	1	1	1	1	1
48	3	0	2	1	1	1	1	18	1	1	2	2	18.7305	2	3	4	2	2	2	2	1	1	2	4	1	3	1	1	1	1	1
49	3	0	1	1	1	1	1	24	1	1	4	4	24.0055	3	3	2	1	2	2	1	1	1	2	1	1	3	1	1	1	3	1
50	3	0	2	1	1	1	1	25	1	1	4	3	21.6041	2	3	3	2	1	1	1	1	1	1	4	1	4	1	1	1	4	1
51	1	0	1	1	1	1	1	27	2	1	2	2	26.3465	3	2	4	4	1	1	1	1	1	1	1	1	3	1	1	1	1	1
52	3	2	1	2	1	1	1	20	1	1	3	2	25.9107	3	4	4	1	1	2	1	1	1	1	4		3	1	1	1	1	1
53	1	0	2	1	1	1	1	23	1	1	2	4	17.9688	1	3	3	4	1	2	1	1	1	1	2	1	2	1	1	1	1	1
54	3	0	1	1	1	1	1	37	3	1	2	2	23.1111	2	2	3	1	2	2	1	1	1	1	1	1	2	1	1	1	1	1
55	3	0	1	1	1	1	1	24	1	1	4	4	22.2063	2	3	3	4	2	2	2	1	1	1	3	1	2	1	1	1	3	1
56	1	0	1	1	1	1	1	33	2	1	2	2	25.3333	3	2	3	4	1	1	1	1	1	1	1	1	3	1	1	1	1	1
57	1	0	1	1	1	1	1	26	2	1	2	2	20.4444	2	2	3	3	2	1	1	1	1	1	3	1	1	1	1	1	1	1
58	2	0	1	1	1	1	1	20	1	1	2	3	15.8079	1	2	3	2	1	2	1	1	1	1	1	1	3	1	1	1	1	1
59	3	0	1	1	1	2	1	19	1	1	2	3	25.5296	3	2	4	1	1	2	1	1	1	2	4	1	3	1	1	1	1	1
60	3	0	1	1	1	1	1	31	2	1	3	2	22.0386	2	2	2	2	2	1	2	1	1	1	4		1	1	1	1	1	1
61	3	0	1	1	1	1	1	19	1	1	1	2	19.2234	2	3	3	4	1	1	1	1	1	1	4	1	3	1	1	1	1	1
62	3	0	1	1	1	1	2	30	2	1	2	2	26.079	3	4	4	2	1	1	1	1	1	1	2	1	3	1	1	1	1	1
63	3	0	1	1	1	1	1	31	2	1	2	2	23.4375	2	4	4	4	1	1	1	1	1	2	4	1	4	1	1	1	2	1
64	3	0	1	1	1	1	1	38	3	1	2	2	19.1467	2	4	4	3	1	1	1	1	1	1	4	1	3	1	1	1	1	1
65	3	0	1	1	1	1	2	22	1	1	2	2	20.0288	2	2	3	2	2	1	1	1	1	1	2	1	3	1	1	1	1	1
66	3	0	1	1	1	1	1	18	1	1	1	3	27.1203	3	4	2	1	2	2	1	1	1	1	4		4	1	1	1	2	1
67	1	0	1	1	1	1	1	19	1	1	1	1	23.9512	2	2	2	4	1	1	1	1	1	2	1	1	4	1	1	1	2	1
68	2	0	1	1	1	1	1	20	1	1	2	3	19.563	2	2	3	5	1	1	1	2	1	1	4	1	3	1	1	1	1	1
69	3	0	1	1	1	1	1	22	1	1	1	2	16.3304	1	3	3	3	1	1	1	1	1	1	4		3	1	1	1	1	1
70	1	0	1	1	1	1	1	28	2	1	2	3	24.974	3	3	3	4	1	1	1	1	1	2	3	2	3	1	1	1	1	1
71	2	0	1	1	1	1	1	33	2	1	1	2	25.7117	3	4	4	1	2	1	2	1	1	1	4	1	2	1	1	1	1	1
72	3	0	1	1	1	1	2	23	1	1	3	3	27.8293	3	4	2	2	2	1	1	1	1	2	4	1	3	1	1	1	1	1
73	3	0	1	1	1	2	1	25	1	1	2	2	22.8624	2	4	4	2	1	1	1	1	1	1	4	1	3	1	1	1	1	1
74	1	0	1	1	1	1	1	24	1	1	3	2	16.8242	1	3	3	5	1	1	1	1	1	2	1	1	3	1	1	1	1	1
75	3	0	1	1	1	1	1	28	2	1	2	3	22.9874	2	4	4	4	1	1	1	1	1	1	4		3	1	1	1	1	1
76	3	0	1	1	1	1	1	25	1	1	3	3	19.8141	2	4	4	1	2	2	1	1	1	2	4	1	4	1	1	1	2	1
77	3	0	1	1	1	1	2	19	1	1	4	4	23.1473	2	2	1	2	1	1	1	1	1	1	4	1	4	1	1	1	4	2
78	1	0	1	1	1	1	1	26	2	1	3	3	27.3438	3	2	2	4	1	1	1	1	1	1	1	1	4	1	1	1	2	1
79	3	0	1	1	1	1	1	11	1	1	1	3	21.9076	2	2	2	2	2	1	1	1	1	2	4	1	4	1	1	1	2	1
80	3	0	1	1	1	1	1	26	2	1	2	2	20.3125	2	4	4	2	1	1	1	1	1	2	4	1	4	1	1	1	2	1
81	3	0	1	1	1	1	1	30	2	1	3	2	26.6728	3	2	3	2	2	1	1	1	1	1	1	1	2	1	1	1	1	1
82	3	0	1	1	1	1	1	21	1	1	2	2	22.1043	2	4	4	1	2	2	1	1	1	1	3		2	1	1	1	1	1
83	3	0	1	1	1	1	1	37	3	1	3	3	23.03	2	3	3	3	1	1	1	1	1	1	4	1	2	1	1	1	1	1
84	3	0	1	1	1	1	1	19	1	1	2	2	24.6094	3	3	3	3	1	2	1	1	1	1	4	1	3	1	1	1	1	1
85	3	0	1	1	1	1	1	29	2	1	3	2	20.3244	2	2	2	3	2	1	1	1	1	1	4	1	4	1	1	1	2	1
86	1	0	1	1	1	1	1	18	1	1	4	4	24.2439	3	1	1	1	2	2	2	1	1	2	1	1	4	1	1	1	4	1
87	3	0	1	1	1	1	1	24	1	1	2	2	19.3962	2	3	3	3	2	2	1	1	1	1	3	1	3	1	1	1	1	1
88	3	0	1	1	1	1	1	26	2	1	2	2	23.4221	2	3	3	4	1	1	1	1	1	2	1		2	1	1	1	1	1
89	3	0	1	1	1	1	2	15	1	1	1	3	21.6311	2	4	2	1	2	2	1	1	1	2	4	1	4	2	1	1	2	1
90	3	2	1	2	1	1	1	29	2	1	2	2	28.5156	3	2	3	3	2	1	1	1	1	1	1		2	1	1	1	1	1
91	3	0	1	1	1	1	1	24	1	1	3	4	22.9421	2	3	2	2	2	1	1	1	1	2	4	1	4	1	1	1	2	1
92	1	0	1	1	1	1	1	11	1	1	4	3	19.7778	2	2	1	4	2	2	1	1	1	2	4	2	1	1	1	1	3	1
93	3	1	1	1	2	1	1	23	1	1	3	3	19.7239	2	4	4	1	1	2	1	1	1	1	4	1	4	1	1	1	2	1
94	1	2	1	2	1	1	1	28	2	1	4	3	17.7778	1	3	3	1	1	2	2	1	1	1	4	2	3	1	1	1	3	1
95	3	0	1	1	1	1	1	24	1	1	2	2	21.4536	2	4	4	3	1	1	1	1	1	1	4	1	4	1	1	1	2	1
96	1	0	1	1	1	1	1	27	2	1	4	2	18.2563	1	3	3	4	1	1	2	1	1	1	4	2	3	1	1	1	3	1
97	3	0	1	1	1	1	1	35	3	1	3	3	27.1416	3	4	2	3	2	1	1	1	1	2	4	1	3	1	1	1	1	1
98	3	0	1	1	1	1	2	26	2	1	2	2	17.898	1	4	4	2	1	1	1	1	1	2	4	1	3	1	1	1	1	1
99	3	0	1	1	1	1	1	18	1	1	3	3	19.5717	2	4	2	2	2	1		1	1	1	4		1	1	1	1	1	1
100	3	0	1	1	1	1	1	25	1	1	2	3	21.4844	2	2	4	1	1	2	1	1	1	2	4	1	3	1	1	1	1	1
101	1	0	1	1	1	1	1	19	1	2	4	4	18.9866	2	1	1	1	2	2	2	1	1	2	4	1	3	1	1	1	3	1
102	2	0	1	1	1	1	1	28	2	1	2	2	15.8169	1	4	3	4	2	1	2	1	1	2	4	1	2	1	1	1	1	1
103	3	0	1	1	1	1	1	17	1	1	4	4	19.1406	2	1	1	1	1	2	2	1	1	2	4	1	4	1	1	1	4	1
104	3	0	1	1	1	1	2	24	1	1	4	3	20.8889	2	3	2	3	2	2	2	1	1	1	4	1	3	1	1	1	3	1
105	1	0	1	1	1	1	1	26	2	1	3	2	17.5781	1	2	3	4	1	1	1	1	1	1	1	1	3	1	1	1	1	1
106	3	0	1	1	1	1	1	30	2	1	3	4	22.3081	2	2	4	2	2	1	1	1	1	2	4		4	1	1	1	2	1
107	1	0	1	1	1	1	1	17	1	2	4	4	20.9566	2	1	1	1	1	2	2	1	1	2	4	1	3	1	1	1	3	1
108	3	0	1	1	1	1	1	17	1	1	4	4	20.1733	2	1	1	2	2	2	2	1	1	1	1		4	1	1	1	4	1
109	3	0	1	1	1	1	2	29	2	1	4	4	20.3125	2	1	3	1	1	2	2	1	1	1	4	1	4	1	1	1	4	1
110	3	0	1	1	1	1	1	23	1	1	3	3	22.4323	2	4	4	1	2	2	1	1	1	1	4	1	4	1	1	1	2	1
111	3	0	1	1	1	1	1	25	1	1	3	2	17.9688	1	3	3	3	1	1	1	1	1	1	4	1	2	1	1	1	1	1
112	1	0	1	1	1	1	1	16	1	1	1	2	20.8117	2	4	1	5	1	1	1	1	1	2	4	1	1	1	1	1	1	1
113	1	0	1	1	1	1	1	25	1	2	4	4	24	3	2	3	4	1	2	1	1	1	1	4	1	2	1	1	1	3	1
114	2	0	1	1	1	1	1	22	1	1	2	2	19.487	2	3	3	3	1	1	1	1	1	1	3	1	3	1	1	1	1	1
115	3	0	1	1	1	1	1	22	1	1	4	3	27.0051	3	3	2	3	1	2	2	2	1	1	4		4	1	1	1	4	1
116	2	0	1	1	1	1	1	30	2	1	2	2	20.1733	2	3	3	2	2	1	2	1	1	2	4	1	2	1	1	1	1	1
117	3	0	1	1	1	2	1	17	1	1	2	2	27.4348	3	4	4	1	1	2	1	1	1	1	4		3	1	1	1	1	1
118	3	0	1	1	1	1	1	20	1	1	2	2	21.0938	2	3	3	3	2	2	2	1	1	1	3		3	1	1	1	1	1
119	3	0	1	1	1	1	1	28	2	1	2	3	21.3675	2	3	3	4	1	1	1	1	1	1	4	1	3	1	1	1	1	1
120	3	0	1	1	1	1	1	25	1	1	4	4	21.4844	2	3	3	4	2	1	1	1	1	1	1		2	1	1	1	3	1
121	3	0	1	1	1	1	1	19	1	1	4	4	26.5643	3	1	1	2	2	1	1	1	1	2	1	1	1	1	1	1	3	1
122	3	0	1	1	1	1	1	27	2	1	4	4	23.9224	2	3	3	1	2	2	1	1	1	1	3	2	2	1	1	1	3	1
123	3	0	1	1	1	1	1	13	1	1	4	4	17.0088	1	1	1	1	2	2	2	1	1	2	4	1	5	1	1	2	4	1
124	1	0	1	1	1	1	1	32	2	1	1	1	28.3039	3	4	3	4	2	1	1	1	1	1	4	1	1	1	1	1	1	1
125	1	0	1	1	1	1	1	14	1	1	1	2	18.6453	2	3	2	2	1	1	1	1	1	2	1	1	4	1	1	1	2	1
126	3	0	1	1	1	1	1	26	2	1	2	2	19.5312	2	3	3	3	2	1	2	1	1	1	3	1	2	1	1	1	1	1
127	1	0	1	1	1	1	1	24	1	1	2	2	23.3091	2	3	3	4	2	1	1	1	1	1	1	2	3	1	1	1	1	1
128	3	0	1	1	1	1	1	13	1	1	4	4	23.833	2	2	1	3	2	2	2	1	1	2	3	1	3	1	1	1	3	1
129	3	0	1	1	1	1	2	17	1	1	4	4	31.6337	3	3	1	1	2	2	1	1	1	2	1	1	1	1	1	2	3	1
130	3	0	1	1	1	1	1	28	2	1	2	2	20.7031	2	4	4	2	1	1	1	1	1	1	4	1	3	1	1	1	1	1
131	3	0	1	1	1	1	1	31	2	1	2	2	21.4536	2	4	4	1	1	2	1	1	1	1	4	1	4	1	1	1	2	1
132	3	0	1	1	1	1	1	16	1	1	4	4	25.4767	3	1	1	1	1	2	2	1	1	2	4	1	3	1	1	1	3	1
133	3	0	1	1	1	1	1	19	1	1	3	3	19.3548	2	3	3	2	1	1	1	1	1	1	4	1	2	1	1	1	1	1
134	3	0	1	1	1	1	2	18	1	1	2	2	23.8281	2	4	4	1	1	2	1	1	1	1	2	1	3	1	1	1	1	1
135	3	2	1	2	1	1	1	33	2	1	2	2	22.2063	2	3	3	4	2	1	1	1	1	1	1	1	2	1	1	2	1	1
136	1	0	1	1	1	1	1	28	2	1	4	4	18.3594	1	1	2	5	1	2	1	1	1	1	1	1	4	1	1	1	4	1
137	2	0	1	1	1	1	1	27	2	1	2	3	30.863	3	2	3	2	2	1	2	1	1	1	4	1	2	1	1	1	1	1
138	3	0	1	1	1	1	1	16	1	1	1	2	25.3906	3	2	2	4	1	1	1	1	1	1	4	1	1	1	1	1	1	1
139	3	0	2	1	1	1	1	23	1	1	2	2	17.0088	1	3	3	4	1	1	1	1	1	1	4	1	2	1	1	1	1	1
140	3	0	1	1	1	1	1	33	2	1	3	2	20.5457	2	2	2	5	2	1	1	1	1	1	4		4	1	1	1	2	1
141	3	0	1	1	1	1	1	37	3	1	1	2	21.7784	2	3	3	4	1	1	2	1	1	1	4	1	3	1	1	1	1	1
142	3	0	1	1	1	1	1	22	1	1	3	3	20.0288	2	3	3	3	2	2	1	2	1	1	1	1	2	1	1	1	1	1
143	2	0	1	1	1	1	1	27	2	1	2	3	20.2848	2	2	3	3	1	1	1	1	1	2	4	1	2	1	1	1	1	1
144	3	0	1	1	1	1	1	27	2	1	4	4	21.3593	2	1	2	2	2	1	1	1	1	1	1	1	2	1	1	1	3	1
145	3	0	1	1	1	1	1	26	2	1	2	2	20.7756	2	2	3	3	1	2	2	1	1	1	2	1	3	1	1	1	1	1
146	3	0	1	1	1	1	1	15	1	1	3	3	22.8329	2	3	3	2	1	2	1	1	1	2	4	1	3	1	1	1	1	1
147	2	0	1	1	1	1	1	17	1	1	4	4	21.4844	2	2	2	2	2	1	2	1	1	2	4	1	4	1	1	1	4	1
148	3	0	1	1	1	1	2	27	2	1	2	3	25.3902	3	3	3	3	2	2	1	1	1	1	4	1	3	1	1	1	1	1
149	3	0	1	1	1	1	2	34	2	1	4	4	23.7332	2	1	1	2	2	1	1	1	1	2	1	1	1	2	1	1	3	1
150	3	0	1	1	1	1	1	19	1	1	4	4	24.0055	3	2	1	3	2	2	2	1	1	1	4		1	1	1	1	3	1
151	2	0	1	1	1	1	1	29	2	1	3	4	24.6548	3	2	3	4	1	2	1	1	1	2	4	1	3	1	1	1	1	1
152	3	0	1	1	1	1	1	19	1	1	3	3	22.719	2	4	4	2	2	1	1	1	1	2	4	1	3	1	1	1	1	1
153	3	0	1	1	1	1	1	32	2	1	3	2	21.83	2	3	3	2	1	1	1	1	1	1	4		3	1	1	1	1	1
154	3	0	1	1	1	1	1	31	2	1	1	3	23.9334	2	2	2	3	1	1	2	1	1	1	1	1	1	1	1	1	1	1
155	3	2	1	2	1	2	1	35	3	1	2	2	22.8329	2	4	4	4	1	1	1	1	1	1	4	1	3	1	1	1	1	1
156	3	0	1	1	1	1	2	27	2	1	2	2	27.6398	3	3	3	4	2	1	1	1	1	1	1		2	1	1	1	1	2
157	2	0	1	1	1	1	1	40	3	1	1	1	24.4352	3	3	3	2	1	1	2	1	1	1	4	1	2	1	1	1	1	1
158	1	0	1	1	1	1	1	22	1	1	2	3	22.4323	2	3	3	3	1	2	1	1	1	1	4	1	2	1	1	1	1	1
159	2	0	1	1	1	1	1	30	2	1	2	1	19.0443	2	2	3	2	1	1	1	1	1	1	4	1	3	1	1	1	1	1
160	3	0	1	1	1	1	1	24	1	1	2	2	24.8358	3	3	3	1	2	2	1	1	1	1	1	1	3	1	1	1	1	1
161	3	2	1	2	1	1	2	35	3	1	2	2	22.8624	2	2	3	2	2	1	1	1	1	2	4	1	3	1	1	1	1	1
162	1	0	1	1	1	1	1	30	2	2	2	2	19.4734	2	3	3	5	1	1	1	2	1	1	2	2	3	1	2	1	1	1
163	3	0	1	1	1	1	1	21	1	1	2	3	19.7239	2	4	4	1	1	2	1	1	1	1	4	1	3	1	1	1	1	1
164	3	0	1	1	1	1	1	30	2	1	4	4	27.5873	3	1	1	4	2	2	1	1	1	2	4	1	3	1	1	1	3	1
165	2	0	1	1	1	1	1	24	1	1	4	4	19.7777	2	3	3	1	1	2	1	1	1	1	4	1	1	1	1	1	3	1
166	3	0	1	1	1	1	1	26	2	1	2	3	19.4734	2	3	3	4	1	1	2	1	1	1	4	1	3	1	1	1	1	1
167	3	0	1	1	1	2	1	20	1	1	2	2	25.9516	3	3	3	2	2	1	1	1	1	1	4	1	2	1	1	1	1	1
168	3	0	1	1	1	2	2	19	1	1	4	4	24.8016	3	1	1	4	2	1	1	1	1	2	4	1	4	2	2	1	4	2
169	3	0	1	1	1	1	1	15	1	1	4	4	19.4734	2	1	2	2	2	1	1	1	1	2	4	1	4	1	1	1	4	1
170	3	2	1	2	1	1	2	20	1	1	2	2	33.7925	3	2	3	1	2	2	1	1	1	1	1	1	2	2	1	1	1	1
171	1	0	1	1	1	2	1	25	1	1	2	2	19.2277	2	2	3	3	1	1	2	1	1	1	4	1	4	1	1	1	2	1
172	2	0	1	1	1	1	1	34	2	1	2	2	20.8117	2	4	3	3	1	1	1	1	1	2	4	1	2	1	1	1	1	1
173	2	0	1	1	1	2	1	14	1	1	4	4	19.3821	2	3	1	2	1	2	1	1	1	2	4	1	1	1	1	1	3	1
174	3	0	1	1	1	1	1	24	1	1	4	4	17.6309	1	3	3	3	2	2	1	1	1	1	1	1	2	1	1	1	3	1
175	2	0	1	1	1	1	1	28	2	2	3	2	24.0346	3	2	3	1	1	2	2	1	1	1	4	1	2	1	1	1	1	1
176	3	0	1	1	1	2	1	31	2	2	4	4	19.7777	2	2	2	2	1	2	2	1	1	1	4		2	1	1	1	3	1
177	3	0	1	1	1	1	2	33	2	1	3	3	19.1111	2	2	1	2	1	1	2	1	1	2	1	1	1	1	1	1	1	1
178	3	0	1	1	1	2	1	22	1	1	3	2	20.6905	2	2	2	2	2	1	1	1	1	2	4	1	4	1	1	1	2	1
179	3	0	1	1	1	1	1	11	1	1	1	3	20.7031	2	3	2	3	2	1	2	1	1	1	3		3	1	1	1	1	1
180	3	0	1	1	1	1	1	36	3	1	2	2	23.0469	2	2	3	3	2	1	1	1	1	1	2	1	2	1	1	1	1	1
181	2	0	1	1	1	1	1	22	1	1	2	2	18.7305	2	3	3	3	2	1	1	1	1	1	4	1	1	1	1	1	1	1
182	3	0	1	1	1	1	1	27	2	1	2	2	19.6283	2	2	3	2	2	1	1	1	1	1	1	1	2	1	1	1	1	1
183	1	0	1	1	1	1	1	26	2	1	2	2	23.1111	2	3	3	5	1	1	2	1	1	1	1	1	4	1	1	1	2	1
184	3	0	1	1	1	2	1	29	2	1	2	3	30.8444	3	2	3	4	2	1	1	1	1	1	1	1	2	2	1	1	1	1
185	2	0	1	1	1	1	1	36	3	1	3	3	21.2306	2	2	2	2	1	2	1	1	1	1	4	1	1	1	1	1	1	1
186	3	0	1	1	1	1	1	29	2	1	2	2	23.8751	2	3	3	1	2	1	1	1	1	1	1	1	2	1	1	1	1	1
187	2	0	1	1	1	1	1	25	1	1	2	2	21.0938	2	3	3	1	1	2	2	1	1	1	4	1	2	1	1	1	1	1
188	3	0	1	1	1	1	1	26	2	1	3	3	17.7462	1	4	4	1	2	2	1	1	1	2	4	1	3	1	1	1	1	1
189	3	0	1	1	1	1	1	32	2	1	2	2	22.8928	2	3	3	2	2	1	2	1	1	1	4	1	4	1	1	1	2	1
190	2	0	1	1	1	1	1	25	1	1	2	2	19.7777	2	3	3	3	2	1	1	1	1	1	2	1	2	1	1	1	1	1
191	3	0	1	1	1	1	1	22	1	1	2	2	23.0469	2	2	4	2	1	1	1	1	1	1	4	1	3	1	1	1	1	1
192	3	0	1	1	1	1	1	20	1	1	2	2	18.75	2	3	3	3	1	1	2	1	1	1	2	1	3	1	1	1	1	1
193	2	0	1	1	1	1	1	16	1	2	4	4	19.5312	2	1	1	1	2	2	2	1	1	2	4	1	1	1	1	1	3	1
194	1	0	1	1	1	1	1	14	1	1	4	3	21.6441	2	1	1	3	1	2	2	1	1	2	4	1	1	1	1	1	3	1
195	3	0	1	1	1	1	2	18	1	1	3	4	19.433	2	3	2	2	2	1	2	1	1	2	4	1	3	2	1	1	1	1
196	3	0	1	1	1	1	1	30	2	1	2	2	25.204	3	3	3	2	2	1	1	1	1	2	1	1	2	1	1	1	1	1
197	3	0	1	1	1	1	1	22	1	1	3	4	22.68	2	2	2	2	1	2	2	1	1	1	1		3	1	1	1	1	1
198	3	0	1	1	1	1	1	33	2	1	2	2	19.5312	2	2	4	1	1	2	1	1	1	1	4		4	1	1	1	2	1
199	1	0	1	1	1	1	1	17	1	1	4	4	24.2188	3	2	1	2	1	2	2	1	1	2	4	1	3	1	1	1	3	1
200	3	0	1	1	1	1	1	26	2	1	2	2	19.7239	2	4	4	2	1	1	1	1	1	1	4	1	4	1	1	1	2	1
201	1	0	1	1	1	1	1	28	2	1	2	2	19.487	2	2	2	4	1	1	1	1	1	1	2	2	3	1	1	1	1	1
202	2	0	1	1	1	1	2	30	2	1	2	3	17.2248	1	2	3	2	1	1	1	1	1	1	1	1	3	1	1	1	1	1
203	3	0	1	1	1	1	1	21	1	1	2	3	24	3	4	3	1	1	2	1	1	1	1	4	1	3	1	1	1	1	1
204	3	0	1	1	1	1	2	18	1	1	2	2	19.5006	2	2	3	2	2	1	1	1	1	1	1	1	2	2	1	1	1	1
205	1	0	2	1	1	1	1	26	2	1	3	2	19.8141	2	3	3	3	1	1	1	1	1	1	1	1	2	1	1	1	1	1
206	3	0	2	1	1	1	1	22	1	1	2	2	20.1348	2	3	3	2	1	1	1	1	1	1	4	1	4	1	1	1	2	1
207	3	0	1	1	1	1	1	19	1	1	1	3	32.3232	3	3	2	2	1	1	2	1	1	2	4	1	1	1	1	1	1	1
208	3	0	1	1	1	1	1	27	2	1	3	3	20.3244	2	3	3	2	2	1	1	1	1	1	4	1	3	1	1	1	1	1
209	2	0	1	1	1	1	1	27	2	1	2	2	22.4766	2	3	3	4	2	1	1	2	1	1	4	1	1	1	1	1	1	1
210	3	0	1	1	1	1	2	25	1	1	4	4	19.052	2	2	2	2	2	2	1	1	1	1	4	1	4	1	1	1	4	1
211	3	0	1	1	1	1	1	24	1	1	4	4	19.8141	2	3	3	4	1	1	1	1	1	2	4	1	2	1	1	1	3	1
212	2	0	1	1	1	1	1	24	1	1	3	3	18.3594	1	2	2	4	1	2	1	1	1	2	2	1	3	1	1	1	1	1
213	2	0	1	1	1	1	1	27	2	1	2	3	18.9745	2	3	2	1	1	2	1	1	1	1	2	1	3	1	1	1	1	1
214	2	0	1	1	1	1	1	21	1	1	3	2	19.8178	2	2	3	3	1	2	1	1	1	2	4	1	1	1	1	1	1	1
215	3	0	2	1	1	1	2	24	1	1	2	2	23.2335	2	3	3	4	2	1	1	1	1	1	4	1	3	1	1	1	1	1
216	3	0	1	1	1	1	1	13	1	1	4	4	21.6441	2	3	1	2	1	1	1	1	1	2	1	1	3	1	1	1	3	1
217	1	0	1	1	1	1	1	11	1	1	4	4	17.7778	1	3	1	3	1	2	1	1	1	1	4	1	1	1	1	1	3	1
218	3	0	1	1	1	1	1	30	2	1	2	2	26.2227	3	3	3	3	1	1	1	1	1	2	4	1	3	1	1	1	1	1
219	2	0	1	1	1	1	1	33	2	1	3	2	21.7193	2	3	2	3	1	1	2	1	1	1	4	1	3	1	1	1	1	1
220	1	0	1	1	1	1	1	24	1	1	2	2	22.7694	2	3	3	4	1	1	1	1	1	1	4	1	3	1	1	1	1	1
221	2	0	1	1	1	1	1	41	3	1	2	2	21.5019	2	2	3	3	1	1	1	1	1	1	4	1	3	1	1	1	1	1
222	3	0	1	1	1	1	1	28	2	1	2	4	22.4766	2	2	3	4	1	1	2	2	1	2	2	1	2	1	1	1	1	1
223	3	0	1	1	1	1	1	24	1	1	2	2	23.8281	2	3	3	3	2	1	2	1	1	1	3	1	3	1	1	1	1	1
224	3	0	1	1	1	1	1	32	2	1	2	2	20.4294	2	2	3	2	1	1	2	1	1	1	2	1	2	1	1	1	1	1
225	2	0	1	1	1	1	1	26	2	1	2	2	22.8329	2	2	3	4	2	1	1	1	1	1	4	1	1	1	1	1	1	1
226	3	0	1	1	1	1	1	21	1	1	3	4	19.9481	2	3	2	2	1	1	2	1	1	2	2	1	2	1	1	1	1	1
227	3	0	1	1	1	1	1	33	2	2	3	2	18.7305	2	3	3	2	2	1	2	1	1	1	1	1	2	1	1	1	1	1
228	3	0	1	1	1	1	1	18	1	1	3	4	19.7777	2	2	2	1	2	2	1	1	1	1	4	1	4	1	1	1	2	1
229	3	0	1	1	1	1	1	15	1	1	2	2	18.1787	1	4	4	2	2	2	2	1	1	1	2	1	2	1	1	1	1	1
230	3	0	1	1	1	1	1	36	3	1	1	3	24.3046	3	2	2	3	2	1	1	1	1	1	4	1	4	1	1	1	2	1
231	3	0	1	1	1	1	1	26	2	1	2	3	22.2656	2	3	3	5	2	1	1	1	1	1	4	1	3	1	1	1	1	1
232	3	0	1	1	1	1	1	36	3	1	4	4	24.4352	3	3	3	2	2	1	1	1	1	2	1	1	3	1	1	1	3	1
233	3	2	1	2	1	1	1	29	2	1	2	2	23.4375	2	4	3	2	2	1	1	1	1	1	3	1	2	1	1	1	1	1
234	3	0	1	1	1	1	1	29	2	1	2	3	18.132	1	3	4	3	2	1		1	1	1	4	1	4	1	1	1	2	1
235	3	0	2	1	1	1	2	33	2	1	2	2	27.3438	3	3	3	3	2	1	1	1	1	1	4	1	3	1	1	1	1	1
236	1	0	1	1	1	1	1	18	1	1	1	2	20.0288	2	2	1	4	1	1	1	1	1	1	4	1	3	1	1	1	1	1
237	3	0	1	1	1	1	1	35	3	1	3	2	21.3039	2	2	2	3	1	1	1	1	1	1	4	1	3	1	1	1	1	1
238	1	0	1	1	1	1	1	27	2	1	2	2	20.8117	2	3	2	5	1	1	1	1	1	1	4	1	3	1	1	1	1	1
239	3	0	1	1	1	1	1	28	2	1	3	3	20.8117	2	2	3	1	2	2	1	1	1	1	4	1	3	1	1	1	1	1
240	1	0	1	1	1	2	1	11	1	1	1	2	19.3962	2	3	2	2	1	1	1	1	1	2	4	1	3	1	1	1	1	1
241	1	0	1	1	1	1	1	28	2	1	4	4	18.75	2	2	2	2	1	1	1	1	1	1	4	1	2	1	1	1	3	1
242	1	0	1	1	1	1	1	31	2	1	4	4	27.3438	3	2	2	5	1	2	1	1	1	2	4	1	3	1	1	1	3	1
243	3	0	1	1	1	1	1	16	1	1	3	3	16.0231	1	1	2	3	1	1	1	1	1	1	4		3	1	1	1	1	1
244	1	0	1	1	1	1	1	20	1	1	2	2	25.711	3	2	3	5	1	2	1	1	1	1	4	1	3	1	1	1	1	1
245	3	0	1	1	1	1	1	15	1	1	1	3	17.7462	1	4	2	1	2	2	1	1	1	2	4	1	4	1	1	1	2	1
246	3	0	1	1	1	1	1	21	1	1	2	2	17.2584	1	2	4	1	2	2	1	1	1	1	2	1	2	1	1	1	1	1
247	3	0	1	1	1	1	1	24	1	1	4	4	22.4766	2	3	2	1	2	2	2	1	1	1	1	2	3	1	1	1	3	1
248	2	0	2	1	1	1	1	23	1	1	2	4	20.7499	2	4	4	4	1	1	2	1	1	1	1	1	3	1	1	1	1	1
249	3	0	1	1	1	1	1	26	2	1	2	3	21.0938	2	4	4	2	1	1	1	1	1	1	4	1	3	1	1	1	1	1
250	3	0	1	1	1	2	2	28	2	1	4	3	18.2899	1	2	2	2	2	1	1	1	1	1	4	1	4	1	1	1	4	1
251	3	0	1	1	1	1	1	18	1	1	1	2	19.5312	2	4	1	4	1	1	1	1	1	2	4	1	3	1	1	1	1	1
252	3	0	1	1	1	1	1	20	1	1	2	2	23.8054	2	4	3	1	1	2	1	1	1	1	4		3	1	1	1	1	1
253	1	0	1	1	1	1	1	31	2	2	4	4	20.4444	2	1	1	3	2	1	1	1	1	1	4	1	3	1	1	1	3	1
254	3	0	1	1	1	1	1	18	1	1	2	2	18.026	1	3	3	1	2	2	1	1	1	2	2	1	3	1	1	1	1	1
255	3	0	1	1	1	2	1	28	2	1	2	2	22.0386	2	4	4	2	1	1	1	1	1	1	4		3	1	1	1	1	1
256	3	0	1	1	1	1	1	32	2	1	3	3	21.9076	2	3	3	3	1	1	1	1	1	1	4		3	1	1	1	1	1
257	3	0	1	1	1	1	1	25	1	1	2	2	25.3906	3	3	3	3	2	2	2	1	1	1	3	1	3	1	1	1	1	1
258	1	0	1	1	1	1	1	27	2	1	4	4	21.7193	2	3	3	2	1	1	2	1	1	1	4	1	2	1	1	1	3	1
259	1	0	1	1	1	1	1	31	2	1	4	4	29.6665	3	3	3	1	1	2	1	1	1	1	4	1	2	1	1	1	3	1
260	2	0	1	1	1	1	1	36	3	1	4	4	20.1733	2	2	2	2	1	1	2	1	1	1	4	2	2	1	1	1	3	1
261	3	0	1	1	1	1	1	34	2	1	2	2	23.9334	2	2	4	2	2	1	1	1	1	1	3	1	2	1	1	1	1	1
262	3	0	2	1	1	1	1	26	2	1	2	2	21.7778	2	4	4	1	1	1	1	1	1	1	4	1	3	1	1	1	1	1
263	3	0	1	1	1	1	1	16	1	1	3	2	25.8478	3	4	2	2	2	1	1	1	1	2	4		4	1	1	1	2	1
264	3	2	1	2	1	1	1	37	3	1	2	2	27.5312	3	3	3	4	1	1	2	1	1	1	3	1	3	1	1	1	1	1
265	3	0	1	1	1	1	1	27	2	1	2	2	17.7778	1	2	4	4	1	1	1	1	1	1	1	1	2	1	1	1	1	1
266	2	0	1	1	1	1	1	31	2	1	4	4	19.5312	2	3	2	2	1	1	2	1	1	2	4	1	2	1	1	1	3	1
267	3	0	1	1	1	1	1	25	1	1	2	2	17.6898	1	4	4	2	1	1	1	1	1	2	4	1	3	1	1	1	1	1
268	3	0	1	1	1	1	1	33	2	2	2	2	20.8117	2	2	3	3	2	1	1	1	1	1	3		2	1	1	1	1	1
269	3	0	1	1	1	1	1	28	2	1	2	2	16.7969	1	2	3	2	2	1	1	1	1	1	2	1	2	1	1	1	1	1
270	3	1	1	1	2	1	1	41	3	1	2	3	19.7777	2	2	4	3	2	1	1	1	1	2	4	1	4	1	1	1	2	1
271	3	0	1	1	1	1	1	36	3	1	2	2	24.0346	3	2	3	1	2	2	1	1	1	1	4	1	3	1	1	1	1	1
272	3	0	1	1	1	1	1	32	2	1	3	3	24.6904	3	4	4	2	1	1	1	1	1	2	4		3	1	1	1	1	1
273	1	0	1	1	1	1	1	28	2	1	2	2	21.875	2	3	3	2	2	1	1	1	1	1	4	2	2	1	1	1	1	1
274	1	0	1	1	1	1	1	20	1	1	4	4	21.4844	2	2	2	1	1	2	1	1	1	1	4	1	2	1	1	1	3	1
275	3	0	1	1	1	1	1	27	2	1	3	3	21.7193	2	2	4	1	2	2	1	1	1	1	4		4	1	1	1	2	1
276	2	0	1	1	1	1	1	24	1	1	4	3	20.1951	2	3	3	1	2	2	2	2	1	1	4	1	2	1	1	1	3	1
277	3	0	1	1	1	1	1	28	2	1	3	3	19.5312	2	2	2	2	2	2	1	1	1	1	2		2	1	1	1	1	1
278	1	0	1	1	1	1	1	24	1	1	4	4	20.5761	2	3	2	4	1	2	1	1	1	1	1	1	3	1	1	1	3	1
279	3	0	1	1	1	1	2	29	2	1	3	3	23.0469	2	3	3	3	1	1	1	1	1	1	4	1	4	1	1	1	2	1
280	3	0	1	1	1	1	1	21	1	1	2	2	30.4832	3	2	3	1	2	2	1	1	1	1	3		2	1	1	1	1	2
281	2	0	1	1	1	1	1	19	1	1	2	2	18.2183	1	3	3	3	1	2	1	1	1	2	4	1	1	1	1	1	1	1
282	3	0	1	1	1	1	1	24	1	1	2	3	22.1003	2	3	3	5	1	1	2	1	1	1	4	1	3	1	1	1	1	1
283	1	0	1	1	1	1	1	32	2	1	3	3	19.487	2	3	3	1	1	1	2	1	1	1	4	1	3	1	1	1	1	1
284	1	0	1	1	1	1	1	23	1	1	3	3	19.5312	2	3	3	2	2	2	1	2	1	1	2	1	2	1	1	1	1	1
285	1	0	1	1	1	1	1	39	3	1	4	4	18.662	2	1	1	2	1	1	1	1	1	1	4	1	3	1	1	1	3	1
286	3	0	1	1	1	1	1	20	1	1	3	3	22.0386	2	3	3	1	2	2	1	1	1	1	1	1	2	1	1	1	1	1
287	3	0	1	1	1	1	1	28	2	1	4	4	24.2424	3	3	3	2	1	1	2	1	1	1	4	1	2	1	1	1	3	1
288	3	0	1	1	1	1	2	11	1	1	3	3	23.2335	2	4	2	2	2	1	1	1	1	2	4	1	4	2	1	1	2	1
289	3	0	1	1	1	1	1	27	2	1	2	2	19.9481	2	3	3	4	1	2	1	1	1	1	4	1	2	1	1	1	1	1
290	2	0	1	1	1	1	1	34	2	1	4	4	24.4444	3	3	1	2	1	1	2	1	1	2	4	1	4	1	1	1	4	1
291	3	0	1	1	1	1	1	16	1	1	2	4	19.9481	2	1	1	4	2	2	1	1	1	1	2	1	4	1	1	1	2	1
292	3	0	1	1	1	1	1	30	2	1	1	3	19.6283	2	2	2	3	2	1	1	1	1	2	4	1	3	1	1	1	1	1
293	1	0	2	1	1	1	1	20	1	1	2	3	17.4818	1	3	3	4	1	2	1	1	1	2	4	1	3	1	1	1	1	1
294	3	0	1	1	1	1	1	27	2	1	4	4	18.4425	1	3	3	2	2	2	1	1	1	2	1	1	3	1	1	1	3	1
295	3	0	1	1	1	1	1	26	2	1	2	2	21.2279	2	3	3	3	2	2	1	1	1	1	1		2	1	1	1	1	1
296	1	0	1	1	1	1	1	21	1	1	2	2	16.4062	1	2	3	2	1	1	2	1	1	1	4	1	3	1	1	1	1	1
297	3	0	1	1	1	1	1	27	2	1	4	4	19.9219	2	2	2	1	1	2	2	1	1	1	4	1	3	1	1	1	3	1
298	3	0	1	1	1	1	2	25	1	1	4	4	26.8352	3	4	4	2	2	2	1	1	1	1	1	1	2	2	1	1	3	1
299	3	0	1	1	1	1	1	23	1	1	4	4	16.7657	1	2	2	3	2	2	2	1	1	2	3	1	2	1	1	1	3	1
300	2	0	1	1	1	1	1	25	1	1	4	4	26.2336	3	2	3	2	1	2	2	1	1	2	1	1	4	1	1	1	4	1
301	3	0	1	1	1	1	1	27	2	1	4	4	23.5304	2	3	2	1	2	2	2	1	1	1	1	1	3	1	1	1	3	1
302	2	0	1	1	1	1	1	19	1	1	1	2	18.0802	1	3	2	2	2	2	1	2	1	2	4	1	1	1	1	1	1	1
303	3	0	1	1	1	1	1	23	1	1	2	3	21.7193	2	4	4	2	1	1	1	1	1	1	4	1	3	1	1	1	1	1
304	3	0	1	1	1	1	1	22	1	1	2	2	22.2222	2	4	3	2	1	1	1	1	1	1	4	1	4	1	1	1	2	1
305	1	0	1	1	1	1	1	28	2	1	4	4	20.8117	2	2	2	4	2	1	1	1	1	1	4	1	3	1	1	1	3	1
306	2	0	1	1	1	1	1	25	1	1	4	4	20.5442	2	3	3	1	2	2	1	1	1	2	4	1	4	1	1	1	4	1
307	3	0	1	1	1	1	1	25	1	1	2	3	18.0802	1	2	3	1	2	2	2	1	1	1	4	1	2	1	1	1	1	1
308	3	0	1	1	1	1	1	19	1	1	2	3	19.8141	2	2	3	2	1	2	2	1	1	1	4	1	3	1	1	1	1	1
309	3	0	1	1	1	1	1	15	1	1	4	4	19.1953	2	1	1	1	1	2	1	1	1	2	4	1	4	1	1	1	4	1
310	3	0	1	1	1	1	1	22	1	1	3	4	20.7031	2	2	3	3	2	1	2	1	1	1	3	1	3	1	1	1	1	1
311	3	0	1	1	1	2	2	14	1	1	3	3	25.1486	3	2	2	3	2	2	2	1	1	2	4	1	1	1	1	1	1	1
312	3	0	1	1	1	1	1	27	2	1	2	2	21.2279	2	3	3	3	2	2	1	1	1	1	3	1	2	1	1	1	1	1
313	3	0	2	1	1	1	1	26	2	1	3	3	22.4609	2	3	3	4	2	1	2	1	1	2	4	1	2	1	1	1	1	1
314	3	0	1	1	1	1	1	23	1	1	2	2	17.5781	1	2	4	2	1	1	1	1	1	2	4	1	4	1	1	1	2	1
315	3	0	2	1	1	1	1	23	1	1	3	4	20.1951	2	2	4	2	2	1	1	1	1	1	4	1	4	1	1	1	2	1
316	3	0	1	1	1	1	1	20	1	1	3	3	20.3125	2	3	3	3	2	2	2	1	1	1	3		3	1	1	1	1	1
317	3	0	1	1	1	1	1	19	1	1	2	2	31.6118	3	3	3	4	1	1	1	1	1	1	4		2	1	1	1	1	1
318	3	0	1	1	1	1	1	28	2	1	2	2	22.1003	2	4	4	2	1	1	1	1	1	1	3		3	1	1	1	1	1
319	3	2	1	2	1	1	1	29	2	1	3	3	27.3438	3	2	2	3	2	2	2	1	1	1	4	1	2	1	1	1	1	1
320	1	0	1	1	1	1	1	23	1	1	3	3	19.563	2	2	2	3	1	2	1	1	1	1	1	1	3	1	1	1	1	1
321	1	0	1	1	1	1	1	21	1	1	4	4	23.4375	2	2	3	4	2	2	1	1	1	1	1	1	3	1	1	1	3	1
322	3	0	1	1	1	1	1	21	1	1	2	2	16.0231	1	4	4	2	1	1	1	1	1	2	4	1	3	1	1	1	1	1
323	3	0	1	1	1	1	2	24	1	1	3	2	25.0967	3	2	3	4	1	1	1	1	1	1	4	1	2	1	1	1	1	1
324	3	0	2	1	1	1	1	21	1	1	3	3	25.7657	3	4	3	2	2	1	1	1	1	2	3	1	3	1	1	1	1	1
325	3	0	1	1	1	1	1	27	2	1	2	2	24.0346	3	3	3	3	2	1	1	1	1	1	1	1	2	1	1	1	1	1
326	1	0	1	1	1	1	1	20	1	1	2	2	19.563	2	3	3	2	1	1	2	2	1	1	1	1	3	1	1	1	1	1
327	3	0	1	1	1	1	1	28	2	1	1	1	23.7253	2	4	4	3	2	1	1	1	1	1	4	1	1	1	1	1	1	1
328	3	0	2	1	1	1	1	26	2	1	2	2	22.1453	2	4	4	2	1	1	1	1	1	2	4	1	3	1	1	1	1	1
329	3	0	1	1	1	1	1	22	1	1	4	3	18.7305	2	3	3	1	1	2	1	1	1	1	4	1	2	1	1	1	3	1
330	3	0	1	1	1	1	1	27	2	1	4	4	20.1348	2	3	3	3	1	1	2	1	1	1	4		2	1	1	1	3	1
331	3	0	1	1	1	1	1	17	1	1	4	3	24.1288	3	4	1	1	2	2	1	1	1	1	4		4	1	1	1	4	1
332	3	0	1	1	1	1	1	22	1	1	3	3	19.8178	2	3	3	5	1	1	1	1	1	1	4	1	3	1	1	1	1	1
333	2	0	1	1	1	1	1	28	2	1	2	2	24.0882	3	2	3	5	1	1	1	1	1	1	4	1	3	1	1	1	1	1
334	3	0	1	1	1	1	1	39	3	1	2	2	22.0386	2	4	4	2	1	1	1	1	1	1	4		3	1	1	1	1	1
335	1	0	2	1	1	1	1	33	2	1	2	2	23.7253	2	2	2	4	1	1	1	1	1	1	4	1	3	1	1	1	1	1
336	3	0	1	1	1	1	1	16	1	1	4	4	19.2277	2	1	1	2	1	1	2	1	1	1	4	1	3	1	1	1	3	1
337	3	0	1	1	1	1	1	30	2	1	2	2	16.8032	1	2	3	1	1	2	1	1	1	1	1	1	2	1	1	2	1	1
338	3	0	1	1	1	1	2	31	2	1	4	4	15.625	1	3	1	2	2	1	1	1	1	2	1	1	1	1	1	1	3	1
339	1	0	1	1	1	1	1	13	1	1	4	4	22.0317	2	1	1	3	1	2	2	1	1	2	4	1	1	1	1	1	3	1
340	2	0	1	1	1	1	1	25	1	1	3	2	21.2279	2	3	3	2	1	1	1	1	1	1	4	1	1	1	1	1	1	1
341	3	0	1	1	1	1	1	24	1	1	3	3	23.3377	2	3	3	2	2	1	1	1	1	1	4		3	1	1	1	1	1
342	3	0	1	1	1	2	1	28	2	1	2	2	23.3091	2	3	3	2	1	1	1	1	1	1	1		2	1	1	1	1	1
343	2	0	1	1	1	1	1	26	2	2	2	2	28.1337	3	4	3	4	2	1	1	1	1	1	4	1	2	1	1	1	1	1
344	3	0	1	1	1	1	1	28	2	1	3	3	25.5296	3	2	4	3	2	1	1	1	1	1	4	1	4	1	1	1	2	1
345	2	0	1	1	1	1	2	37	3	1	2	4	24.5578	3	1	1	2	1	1	2	1	1	1	2	1	5	1	1	2	2	1
346	3	0	1	1	1	1	1	31	2	1	2	2	19.2277	2	3	3	4	1	1	1	1	1	1	4	1	3	1	1	1	1	1
347	3	2	1	2	1	1	1	25	1	1	2	2	29.5159	3	4	4	4	2	1	1	1	1	1	1	1	2	1	1	1	1	1
348	1	0	1	1	1	1	1	30	2	1	4	4	23.2335	2	2	3	2	1	1	2	1	1	2	4	2	2	1	1	1	3	1
349	3	0	1	1	1	1	1	30	2	1	2	3	25.5588	3	4	4	4	2	2	1	1	1	2	4	1	3	1	1	1	1	1
350	1	0	1	1	1	1	1	24	1	1	2	2	23.4375	2	3	3	4	1	1	1		1	1		1	4	1	1	1	2	1
351	3	0	1	1	1	1	1	22	1	1	2	2	18.2899	1	2	3	1	2	2	1	1	1	1	1		2	1	1	1	1	1
352	1	0	1	1	1	1	1	19	1	1	2	2	18.4911	1	2	3	4	1	2	1	1	1	1	1	1	3	1	1	1	1	1
353	2	0	1	1	1	1	1	14	1	2	1	3	19.563	2	2	2	3	2	1	1	1	1	2	4	1	1	1	1	1	1	1
354	3	0	1	1	1	1	1	20	1	1	2	2	21.4844	2	2	3	1	2	2	1	1	1	1	2	1	2	1	1	1	1	1
355	3	0	1	1	1	1	1	31	2	1	2	2	20.6035	2	4	3	3	2	1	1	1	1	1	1	1	2	1	1	1	1	1
356	1	0	1	1	1	1	1	25	1	1	2	2	23.1111	2	2	3	4	1	1	1	1	1	1	3	1	2	1	1	1	1	1
357	3	0	1	1	1	1	1	32	2	1	2	2	20.5592	2	4	4	4	2	1	1	1	1	1	1	1	1	1	1	1	1	1
358	3	0	1	1	1	1	1	22	1	1	2	2	21.3333	2	3	3	4	2	2	1	1	1	1	4	1	3	1	1	1	1	1
359	3	0	1	1	1	1	1	24	1	1	4	4	20.9644	2	2	2	1	1	2	1	1	1	1	1	1	2	1	1	1	3	1
360	3	0	1	1	1	1	1	29	2	1	3	2	21.6311	2	4	4	2	1	1	1	1	1	1	4	1	3	1	1	1	1	1
361	3	0	1	1	1	1	1	33	2	1	2	2	21.6311	2	2	3	2	2	1	1	1	1	1	1		2	1	1	1	1	1
362	3	0	1	1	1	1	1	32	2	1	3	3	23.8751	2	4	4	2	2	1	1	1	1	1	4		4	1	1	1	2	1
363	3	0	1	1	1	1	1	25	1	1	4	4	20.3074	2	2	2	1	2	2	1	1	1	1	4	1	3	1	1	1	3	1
364	3	0	1	1	1	1	1	23	1	1	3	2	26.1427	3	4	4	4	2	1	1	1	1	1	4		4	1	1	1	2	1
365	3	0	1	1	1	1	1	19	1	1	2	2	25.3906	3	3	3	4	1	2	1	1	1	1	4	1	3	1	1	1	1	1
366	2	0	1	1	1	1	1	19	1	2	1	2	21.4844	2	2	2	3	1	2	1	1	1	2	4	1	1	1	1	1	1	1
367	3	0	1	1	1	1	1	24	1	1	2	3	20.0288	2	2	3	2	1	1	1	1	1	2	4	1	4	1	1	1	2	1
368	3	0	1	1	1	1	1	21	1	1	2	3	19.2894	2	2	2	1	2	2	1	1	1	1	4	1	4	1	1	1	2	1
369	3	0	1	1	1	1	1	38	3	1	2	2	18.3143	1	3	3	4	1	1	2	1	1	1	4	1	3	1	1	1	1	1
370	3	0	1	1	1	1	1	33	2	1	3	4	26.9531	3	3	2	3	1	1	2	1	1	1	1	1	2	1	1	1	1	1
371	2	0	1	1	1	1	2	26	2	1	2	2	47.2952	3	3	3	2	1	1	2	1	1	1	3	1	2	1	1	1	1	1
372	3	2	1	2	1	1	1	31	2	1	4	4	25.7117	3	2	2	4	1	2	1	1	1	1	4		3	1	1	1	3	1
373	3	0	1	1	1	1	1	26	2	1	3	3	16.4237	1	4	4	2	1	1	1	1	1	2	4	1	3	1	1	1	1	1
374	3	0	2	1	1	1	2	36	3	1	2	2	21.875	2	2	4	2	1	1	1	1	1	1	4	1	4	1	1	1	2	1
375	1	0	1	1	1	2	1	28	2	1	2	3	21.2585	2	3	3	4	2	1	1	1	1	1	4	2	3	1	1	1	1	1
376	2	0	1	1	1	1	2	30	2	1	2	2	23.8281	2	3	3	3	1	1	2	1	1	1	1	1	4	1	1	1	2	1
377	1	0	1	1	1	1	1	22	1	1	4	4	22.8928	2	3	2	5	1	2	1	1	1	1	4	1	3	1	1	1	3	1
378	3	0	1	1	1	1	1	25	1	1	2	2	20.945	2	3	3	3	1	2	1	1	1	1	4	1	2	1	1	1	1	1
379	3	0	1	1	1	1	1	26	2	1	3	4	26.3465	3	2	3	5	1	1	1	1	1	1	4	1	3	1	1	1	1	1
380	3	0	1	1	1	1	1	22	1	1	2	2	13.6254	1	4	4	1	1	1	1	1	1	1	4	1	3	1	1	1	1	1
381	3	0	1	1	1	1	1	29	2	1	2	2	22.8329	2	2	3	1	2	2	1	1	1	1	1		2	1	1	1	1	1
382	3	0	1	1	1	1	1	33	2	1	4	3	20.83	2	3	3	4	2	1	1	1	1	2	4	1	3	1	1	1	3	1
383	3	0	1	1	1	1	1	21	1	1	2	2	20.0288	2	3	3	2	1	1	1	1	1	1	4	1	2	1	1	1	1	1
384	2	0	1	1	1	1	1	26	2	1	2	2	21.6413	2	3	3	4	1	1	1	1	1	1	1	2	3	1	1	1	1	1
385	3	0	1	1	1	1	1	30	2	2	4	4	19.563	2	2	3	1	1	2	2	1	1	1	4	1	2	1	2	1	3	1
386	3	0	1	1	1	2	1	21	1	1	2	2	20.9572	2	3	3	3	2	1	1	1	1	1	4		3	1	1	1	1	1
387	3	0	1	1	1	1	1	25	1	1	3	3	23.634	2	3	3	3	2	2	1	1	1	2	1		2	1	1	1	1	1
388	1	0	1	1	1	1	1	27	2	1	2	2	22.806	2	3	3	4	1	2	1	1	1	1	1	1	3	1	1	1	1	1
389	3	0	1	1	1	1	2	25	1	1	2	2	23.2335	2	2	3	4	1	1	1	1	1	1	2	1	3	1	1	1	1	1
390	3	0	1	1	1	1	1	32	2	1	2	2	22.1893	2	4	4	3	1	1	1	1	1	2	4	1	4	1	1	1	2	1
391	2	0	1	1	1	1	1	27	2	1	2	2	18.3655	1	4	2	3	1	1	1	1	1	1	4	1	2	1	1	1	1	1
392	3	0	1	1	1	1	2	20	1	1	2	2	21.7784	2	4	4	3	1	2	1	1	1	1	4		3	1	1	1	1	1
393	3	0	1	1	1	1	1	37	3	1	3	2	20.0288	2	4	4	1	1	1	1	1	1	1	4		3	1	1	1	1	1
394	2	2	1	2	1	1	1	20	1	1	2	2	19.9219	2	2	2	4	1	2	1	1	1	1	4	1	3	1	1	2	1	1
395	1	0	1	1	1	1	1	22	1	1	3	3	21.0938	2	4	3	1	1	2	1	1	1	1	4	1	3	1	1	1	1	1
396	3	0	1	1	1	1	2	17	1	1	4	4	27.5482	3	1	1	3	2	2	1	1	1	1	4	1	3	1	1	1	3	1
397	2	0	1	1	1	1	1	30	2	1	3	3	22.0604	2	3	3	4	2	1	1	1	1	2	4	1	1	1	1	1	1	1
398	2	0	1	1	1	1	1	33	2	1	1	2	19.563	2	3	3	5	2	1	1	1	1	1	4	1	2	1	1	1	1	1
399	3	0	1	1	1	1	2	31	2	1	3	2	22.719	2	4	4	1	1	2	1	1	1	1	4	1	4	1	1	1	2	1
400	1	0	1	1	1	1	1	25	1	1	2	2	17.9282	1	2	3	5	1	1	1	1	1	2	1	1	3	1	1	2	1	1
401	2	0	1	1	1	1	1	32	2	1	4	4	19.1001	2	2	2	2	2	1	2	1	1	2	4	1	2	1	1	1	3	1
402	3	0	1	1	1	1	1	43	3	1	1	1	24.8358	3	3	3	5	2	1	1	1	1	2	4	1	2	1	1	1	1	1
403	3	0	1	1	1	1	1	14	1	1	4	4	17.8506	1	3	1	2	2	1	1	1	1	2	1	1	3	1	1	1	3	1
404	3	0	1	1	1	1	1	25	1	1	4	3	18.6667	2	2	4	1	2	2	1	1	1	1	3	1	2	1	1	1	3	1
405	3	0	1	1	1	1	1	18	1	1	2	3	24.2382	3	3	1	1	2	2	2	1	1	1	2	1	3	1	1	1	1	1
406	3	0	1	1	1	1	1	17	1	1	4	4	18.1955	1	3	1	1	2	2	1	1	1	1	1		3	1	1	1	3	1
407	3	0	1	1	1	1	1	26	2	1	3	2	24.4352	3	4	4	3	1	1	1	1	1	1	4		4	1	1	1	2	1
408	3	0	1	1	1	1	1	29	2	1	3	4	19.052	2	2	4	2	2	1	1	1	1	1	4	1	4	1	1	1	2	1
409	3	0	1	1	1	1	1	22	1	1	2	2	23.7118	2	3	3	1	1	2	1	1	1	2	4	1	4	1	1	1	2	1
410	3	0	1	1	1	1	1	18	1	1	1	3	20.6905	2	3	2	3	2	1	1	1	1	2	4	1	4	1	1	1	2	1
411	3	0	1	1	1	1	1	23	1	1	2	2	22.3133	2	4	4	4	2	1	1	1	1	1	4	1	3	1	1	1	1	1
412	3	0	1	1	1	1	1	15	1	1	1	3	19.2894	2	2	2	3	2	1	1	1	1	2	4	1	4	1	1	1	2	1
413	2	0	1	1	1	1	1	24	1	1	3	3	20.9321	2	2	3	2	1	1	1	1	1	1	4	1	1	1	1	1	1	1
414	3	0	1	1	1	1	1	27	2	1	2	3	23.634	2	4	3	4	2	1	1	1	1	1	4	1	3	1	1	1	1	1
415	3	0	1	1	1	1	2	24	1	1	3	2	22.6562	2	2	3	4	2	2	1	1	1	1	4		3	1	1	1	1	1
416	3	0	1	1	1	1	1	24	1	1	2	2	21.436	2	3	3	2	2	1	1	1	1	1	4	1	2	1	1	1	1	1
417	1	0	1	1	1	1	1	21	1	1	3	3	21.4844	2	3	3	3	1	2	1	1	1	1	4	1	2	1	2	1	1	1
418	3	0	2	1	1	1	1	39	3	1	1	1	26.6667	3	2	4	1	2	1	1	1	1	1	1	1	1	1	1	2	1	1
419	2	0	1	1	1	1	1	20	1	1	2	2	18.8271	2	3	3	4	2	1	2	2	1	1	4	1	3	1	1	1	1	1
420	1	0	1	1	1	2	1	36	3	1	1	1	22.0386	2	3	2	2	1	1	2	1	1	1	1	1	3	1	1	1	1	1
421	2	0	1	1	1	1	1	23	1	1	3	3	21.4844	2	3	3	1	1	2	1	1	1	2	4	1	1	1	1	1	1	1
422	3	0	1	1	1	1	1	30	2	1	3	3	17.9089	1	4	4	3	2	1	1	1	1	1	4	1	4	1	1	1	2	1
423	1	0	1	1	1	1	1	24	1	1	4	4	17.4044	1	2	3	5	1	2	1	1	1	1	4	1	3	1	1	1	3	1
424	3	0	1	1	1	1	1	14	1	1	4	4	20.6852	2	1	1	1	2	2	1	1	1	2	1	1	1	1	1	1	3	1
425	3	0	1	1	1	1	1	25	1	1	2	3	24.4352	3	4	4	2	1	1	1	1	1	1	4	1	3	1	1	1	1	1
426	3	0	1	1	1	1	1	24	1	1	2	2	22.8928	2	4	4	2	1	1	1	1	1	1	4		3	1	1	1	1	1
427	2	1	1	1	2	1	1	20	1	1	2	2	21.3675	2	2	3	5	1	1	1	1	1	2	4	1	3	1	1	1	1	1
428	3	0	1	1	1	1	1	25	1	1	3	4	22.0317	2	3	4	4	2	1	1	1	1	1	4	1	3	1	1	1	1	1
429	2	0	1	1	1	1	2	30	2	1	2	2	27.3438	3	3	3	4	2	2	1	1	1	1	4	1	3	1	1	1	1	1
430	3	0	1	1	1	1	1	20	1	1	2	3	16.7969	1	3	3	1	1	2	1	1	1	2	4	1	3	1	1	1	1	1
431	2	0	1	1	1	1	1	23	1	1	2	2	17.7778	1	2	3	4	1	1	1	1	1	1	1	1	3	1	1	1	1	1
432	1	0	1	1	1	1	1	25	1	1	3	2	22.2222	2	2	2	5	1	1	1	1	1	1	1	1	4	1	1	1	2	1
433	1	2	1	2	1	1	1	34	2	1	2	2	20.8117	2	3	3	3	1	1	1	1	1	1	1	1	3	1	1	1	1	1
434	1	0	2	1	1	1	1	24	1	1	2	1	21.5645	2	2	2	2	1	1	1	1	1	1	4	1	3	1	1	1	1	1
435	2	0	1	1	1	1	1	43	3	1	2	2	23.4375	2	2	3	5	1	1	1	1	1	1	4	1	3	1	1	1	1	1
436	1	0	1	1	1	1	1	25	1	1	4	2	30.8185	3	3	3	4	1	2	1	1	1	1	4	1	3	1	1	1	3	1
437	1	0	1	1	1	1	1	23	1	1	4	4	16.6493	1	1	3	2	1	2	1	1	1	2	1	1	3	1	1	1	3	1
438	3	0	1	1	1	1	1	27	2	1	2	3	18.9619	2	4	4	2	1	1	1	1	1	1	4	1	3	1	1	1	1	1
439	1	0	1	1	1	1	2	39	3	1	4	4	25.7778	3	1	1	1	1	1	2	1	1	2	1	1	3	1	1	1	3	1
440	3	0	1	1	1	1	1	31	2	1	2	2	20.8117	2	4	4	2	1	1	1	1	1	2	4	1	3	1	1	1	1	1
441	3	0	1	1	1	1	2	31	2	1	3	3	21.0772	2	4	2	3	2	1	1	1	1	1	4		4	1	1	1	2	1
442	2	0	1	1	1	1	1	27	2	1	4	4	22.8928	2	3	3	3	2	1	1	1	1	1	4	1	2	1	1	1	3	2
443	2	0	1	1	1	1	1	27	2	1	4	4	19.3359	2	1	3	2	1	1	2	1	1	1	4	1	4	1	1	1	4	1
444	3	0	1	1	1	1	1	16	1	1	4	4	20.1951	2	2	2	3	2	2	1	1	1	1	4	1	3	1	1	1	3	1
445	3	0	1	1	1	1	1	25	1	2	2	2	23.4952	2	3	3	3	1	1	1	1	1	1	4	1	3	1	1	1	1	1
446	3	0	2	1	1	1	1	28	2	1	3	2	18.4265	1	2	3	3	2	1	1	1	1	1	4	1	4	1	1	1	2	1
447	3	0	1	1	1	1	1	28	2	1	2	2	17.6309	1	3	3	3	2	1	2	1	1	2	4	1	4	1	1	1	2	1
448	3	0	1	1	1	1	1	25	1	1	2	2	21.3382	2	4	4	2	1	1	1	1	1	1	4	1	3	1	1	1	1	1
449	3	0	2	1	1	1	1	20	1	1	2	2	22.8329	2	2	3	2	2	1	1	1	1	1	1	1	2	1	1	1	1	1
450	3	2	1	2	1	1	1	21	1	1	2	3	21.875	2	3	3	3	2	2	2	1	1	1	3	1	3	1	1	1	1	1
451	3	0	1	1	1	1	1	26	2	1	3	3	18.8271	2	2	4	3	2	1	1	1	1	2	4	1	4	1	1	1	2	1
452	3	0	1	1	1	1	1	32	2	1	2	3	18.7328	2	3	3	3	1	1	1	1	1	1	4	1	1	1	1	2	1	1
453	3	0	1	1	1	1	1	20	1	1	2	2	22.6409	2	3	3	3	2	2	1	1	1	1	1	1	1	1	1	1	1	1
454	2	0	1	1	1	1	1	30	2	1	3	3	22.8928	2	3	3	4	1	1	1	1	1	1	1	1	3	1	1	1	1	1
455	3	0	1	1	1	1	1	26	2	1	4	4	16.5289	1	2	3	3	2	1	2	1	1	1	4	1	2	1	1	1	3	1
456	3	0	1	1	1	1	1	33	2	1	1	1	21.2306	2	3	3	4	1	1	1	1	1	2	1	1	1	1	1	1	1	1
457	2	0	1	1	1	1	1	25	1	1	2	2	30.8444	3	4	4	4	2	1	1	1	1	1	4	1	2	1	1	1	1	1
458	3	0	1	1	1	1	1	26	2	1	4	4	20.3857	2	2	2	3	1	2	1	1	1	2	4	1	3	1	1	1	3	1
459	1	0	1	1	1	1	1	29	2	1	2	2	21.0828	2	3	3	5	1	1	1	1	1	1	3	1	4	1	1	1	2	1
460	3	1	2	1	2	1	1	21	1	1	3	3	18.7328	2	2	4	1	2	1	1	1	1	2	4	1	4	1	1	1	2	1
461	2	0	1	1	1	1	1	27	2	1	2	3	19.5312	2	3	3	2	2	1	2	1	1	1	4	1	2	1	1	1	1	1
462	1	0	1	1	1	1	2	25	1	1	4	4	26.1719	3	2	2	3	1	1	1	1	1	1	1	1	3	1	1	1	3	1
463	1	0	1	1	1	1	1	34	2	1	4	4	20.5126	2	2	3	2	1	1	2	1	1	1	4	1	2	1	1	1	3	1
464	3	0	1	1	1	1	2	18	1	1	4	4	16.2331	1	1	1	2	2	1	2	1	1	2	4	1	4	2	1	1	4	1
465	1	0	1	1	1	1	1	22	1	1	2	2	20.5457	2	3	2	4	2	1	1	1	1	1	4	1	1	1	1	1	1	1
466	3	0	1	1	1	1	1	34	2	1	3	3	19.2277	2	2	2	1	1	2	2	1	1	1	1		1	1	1	1	1	1
467	1	0	1	1	1	1	1	10	1	1	3	4	27.5862	3	3	2	2	1	2	2	1	1	2	1	1	3	1	1	1	1	1
468	3	0	1	1	1	1	1	20	1	1	2	2	27.3438	3	2	3	3	1	2	1	1	1	1	2	1	1	1	1	1	1	1
469	3	1	1	1	2	1	1	26	2	1	2	2	28.3531	3	3	3	3	2	2	2	1	1	1	4	1	3	1	1	1	1	1
470	2	0	1	1	1	1	1	19	1	1	4	2	24.0346	3	3	1	4	2	1	2	1	1	2	1	1	1	1	1	1	3	1
471	1	0	1	1	1	1	1	19	1	1	3	3	19.8347	2	2	2	1	1	2	2	1	1	1	1	1	3	1	1	1	1	1
472	1	0	1	1	1	1	1	11	1	1	4	3	16.7969	1	2	1	4	1	2	1	1	1	2	4	1	3	1	1	1	3	1
473	3	0	1	1	1	1	1	28	2	1	3	3	22.719	2	4	4	3	2	1	1	1	1	2	1	1	2	1	1	1	1	1
474	3	0	1	1	1	1	1	27	2	1	2	2	27.5312	3	3	3	3	2	2	1	1	1	1	1	1	2	1	1	1	1	1
475	3	0	1	1	1	1	1	30	2	1	2	2	23.533	2	4	4	3	1	1	1	1	1	1	4		3	1	1	1	1	1
476	3	0	1	1	1	1	1	14	1	1	4	4	23.5078	2	1	1	1	1	2	1	1	1	1	3		4	1	1	1	4	1
477	3	0	1	1	1	1	1	20	1	1	2	2	20.3223	2	3	3	3	2	2	1	1	1	1	1		2	1	1	1	1	1
478	3	0	2	1	1	1	1	29	2	1	2	2	19.6511	2	3	3	3	2	1	2	1	1	2	4	1	3	1	1	1	1	1
479	2	0	1	1	1	1	1	27	2	1	4	4	22.4323	2	2	2	4	2	2	1	1	1	1	3	1	4	1	1	1	4	1
480	3	0	1	1	1	1	1	29	2	1	4	3	23.2335	2	3	2	4	1	1	2	1	1	1	4	1	3	1	1	1	3	1
481	3	0	1	1	1	1	1	30	2	1	2	2	21.0938	2	4	4	2	1	1	1	1	1	1	4	1	3	1	1	1	1	1
482	1	0	1	1	1	1	2	20	1	1	3	2	24.2188	3	2	2	4	1	2	1	1	1	1	1	1	3	1	1	1	1	1
483	1	0	1	1	1	1	1	31	2	1	1	2	20.0288	2	1	1	4	1	1	1	1	1	2	3	1	3	1	1	1	1	1
484	3	0	1	1	1	1	2	35	3	1	4	4	21.7784	2	3	2	1	2	2	1	1	1	1	1		2	1	1	1	3	1
485	3	0	1	1	1	1	1	29	2	1	4	4	20.9572	2	3	3	4	2	2	2	1	1	1	1		3	1	1	1	3	1
486	1	0	1	1	1	1	1	16	1	2	4	4	20.7031	2	1	1	1	1	2	2	1	1	2	1	1	3	1	1	1	3	1
487	3	0	1	1	1	1	1	34	2	1	4	3	20.83	2	3	4	2	2	1	2	1	1	1	2	1	2	1	1	1	3	1
488	1	0	1	1	1	1	1	27	2	1	4	4	19.9219	2	2	2	4	1	2	1	1	1	1	4	1	2	1	1	1	3	1
489	3	0	1	1	1	1	1	25	1	1	2	2	20.1951	2	4	4	1	2	2	1	1	1	1	4	1	4	1	1	1	2	1
490	3	0	1	1	1	1	1	23	1	1	3	3	27.8159	3	2	3	4	1	1	1	1	1	1	3		3	1	1	1	1	1
491	3	0	1	1	1	1	1	39	3	1	3	2	23.7332	2	2	2	4	2	1	1	1	1	1	1		2	1	1	1	1	1
492	3	0	2	1	1	1	1	19	1	1	3	3	22.8928	2	4	4	2	2	1	1	1	1	1	4	1	3	1	1	1	1	1
493	2	0	1	1	1	1	1	27	2	1	2	2	21.0828	2	3	3	3	1	1	1	1	1	2	4	1	2	1	1	1	1	1
494	3	2	1	2	1	1	1	32	2	1	2	3	21.7193	2	4	4	3	2	1	1	1	1	2	4	1	4	1	1	1	2	1
495	3	0	1	1	1	1	1	35	3	1	2	2	22.6003	2	3	3	3	1	1	1	1	1	1	4	1	3	1	1	1	1	1
496	3	0	1	1	1	1	1	13	1	1	4	4	19.052	2	1	1	1	2	2	1	1	1	1	4	1	4	1	1	1	4	1
497	2	0	1	1	1	1	1	28	2	1	4	4	17.0656	1	1	3	1	1	2	2	1	1	2	4	1	3	1	1	1	3	1
498	3	0	1	1	1	1	1	31	2	1	3	3	15.0457	1	2	2	2	2	1	1	1	1	1	4	1	4	1	1	1	2	1
499	3	0	1	1	1	1	1	21	1	1	2	2	12.487	1	3	3	4	1	1	1	1	1	1	4	1	3	1	1	1	1	1
500	1	0	2	1	1	1	1	27	2	1	3	1	20.83	2	2	3	4	1	1	1	1	1	1	1	1	3	1	1	1	1	1
501	2	0	1	1	1	1	2	21	1	1	2	2	22.8928	2	3	3	2	1	2	2	1	1	1	1	1	3	1	1	1	1	1
502	3	0	1	1	1	1	2	39	3	1	4	4	24.0346	3	1	1	4	1	1	1	1	1	2	4	1	3	1	1	1	3	1
503	3	0	1	1	1	1	1	16	1	1	3	4	21.3039	2	1	1	3	1	1	1	1	1	1	4	1	1	1	1	1	1	1
504	2	0	2	1	1	1	1	20	1	1	3	2	18.6709	2	3	3	5	1	2	1	1	1	1	4	1	2	1	1	1	1	1
505	1	0	1	1	1	1	1	24	1	1	4	4	19.4674	2	3	3	3	1	2	2	1	1	2	4	1	2	1	1	1	3	1
506	2	0	1	1	1	1	1	21	1	2	3	3	17.898	1	3	3	1	1	2	1	1	1	1	4	1	1	1	1	1	1	1
507	3	0	1	1	1	2	2	37	3	1	2	4	25.9107	3	2	3	4	1	1	2	1	1	1	4	1	2	1	1	1	1	1
508	3	0	1	1	1	2	1	19	1	1	3	2	25.3444	3	3	3	1	1	2	1	1	1	2	4	1	3	1	1	1	1	1
509	3	0	1	1	1	1	1	16	1	1	1	4	22.1003	2	2	2	3	2	1	1	1	1	2	4		4	1	1	1	2	1
510	3	0	1	1	1	1	1	28	2	1	3	3	24.4352	3	3	3	2	2	2	2	1	1	1	3		3	1	1	1	1	1
511	1	0	1	1	1	1	1	23	1	1	2	3	23.8751	2	2	3	3	1	1	2	1	1	1	1	1	3	1	2	1	1	1
512	3	0	1	1	1	1	1	28	2	1	3	3	20.5078	2	3	3	1	2	2	1	1	1	1	1		2	1	1	1	1	1
513	3	0	1	1	1	1	1	22	1	1	2	2	30.4218	3	4	4	1	1	2	1	1	1	1	4	1	3	1	1	1	1	1
514	3	0	2	1	1	1	1	23	1	1	1	2	24.0346	3	2	3	2	2	1	2	1	1	1	1	1	1	1	1	1	1	1
515	3	0	1	1	1	1	1	23	1	1	2	2	24.8358	3	4	4	1	1	2	1	1	1	1	4	1	3	1	1	1	1	1
516	3	0	1	1	1	1	1	26	2	1	2	2	22.4766	2	3	3	2	2	1	2	1	1	1	4	1	4	1	1	1	2	1
517	2	0	1	1	1	1	1	28	2	1	2	2	24.0346	3	2	3	4	2	1	1	1	1	1	4	1	2	1	1	1	1	1
518	3	0	1	1	1	1	1	27	2	1	3	3	19.6283	2	2	4	2	2	1	2	1	1	1	4		2	1	1	1	1	1
519	3	0	1	1	1	2	1	29	2	1	2	3	21.9899	2	4	4	2	2	1	1	1	1	1	4	1	3	1	2	1	1	1
520	1	0	1	1	1	1	2	41	3	1	3	2	23.4375	2	3	3	1	1	2	2	1	1	1	4	1	4	1	1	1	2	1
521	3	2	1	2	1	1	1	28	2	1	2	2	31.245	3	4	4	2	1	1	1	1	1	1	4	1	3	1	1	1	1	1
522	3	0	1	1	1	1	1	28	2	1	3	3	20.061	2	2	3	2	2	1	1	1	1	1	4	1	3	1	1	1	1	1
523	3	0	1	1	1	1	1	35	3	1	3	3	18.4911	1	4	4	1	1	2	1	1	1	1	4		3	1	1	1	1	1
524	3	0	2	1	1	1	1	34	2	1	2	2	18.7305	2	2	3	3	2	1	1	1	1	1	4	1	3	1	1	1	1	1
525	3	0	1	1	1	1	1	23	1	1	3	3	25.6369	3	4	4	2	2	1	1	1	1	1	4	1	3	1	1	1	1	1
526	2	0	1	1	1	2	1	43	3	1	1	2	25.6312	3	2	3	4	1	1	1	1	1	1	1	1	4	1	1	1	2	1
527	3	0	1	1	1	1	1	25	1	1	3	3	22.0317	2	4	4	1	2	2	1	1	1	2	4	1	3	1	1	1	1	1
528	3	0	1	1	1	1	1	26	2	1	2		17.313	1		3	1	2	2	2	1	1	1	1	1	4	1	1	1	2	1
529	3	0	1	1	1	1	1	34	2	1	2	2	19.9792	2	3	3	3	2	1	1	1	1	1	4		3	1	1	1	1	1
530	1	0	1	1	1	1	1	11	1	1	1	2	25.8065	3	2	2	4	1	1	1	1	1	2	4	1	3	1	1	1	1	1
531	3	0	1	1	1	1	1	28	2	1	2	2	21.4844	2	3	3	4	1	1	1	1	1	1	3	1	2	1	1	1	1	1
532	3	0	1	1	1	1	1	28	2	1	3	2	25.8065	3	4	4	2	1	1	1	1	1	1	4		4	1	1	1	2	1
533	2	2	1	2	1	1	1	33	2	1	4	4	23.4375	2	3	2	2	1	1	1	1	1	1	4	1	2	1	1	1	3	1
534	3	0	1	1	1	1	1	24	1	1	2	2	20.3428	2	3	3	3	1	1	2	1	1	1	4	1	3	1	1	1	1	1
535	3	0	2	1	1	1	1	23	1	1	3	3	31.2452	3	4	4	1	2	2	1	1	1	1	4		4	1	1	1	2	1
536	3	0	1	1	1	1	1	30	2	1	2	2	24.974	3	3	3	3	2	1	1	1	1	1	1	1	4	1	1	1	2	1
537	3	0	1	1	1	1	1	26	2	1	4	4	33.2986	3	3	2	2	2	1	1	1	1	1	3	1	2	1	1	1	3	1
538	3	0	1	1	1	1	1	32	2	1	3	3	20.0288	2	1	4	3	2	1	1	1	1	1	4		3	1	2	1	1	1
539	3	0	1	1	1	1	1	21	1	1	2	2	24.5578	3	3	3	5	1	2	1	1	1	1	4		3	1	1	1	1	1
540	3	2	1	2	1	1	1	23	1	1	2	2	26.2917	3	4	4	1	1	2	1	1	1	1	4	1	3	1	1	1	1	1
541	3	0	1	1	1	1	1	23	1	1	2	2	19.5312	2	4	4	1	1	2	1	1	2	1	4	1	4	1	1	1	2	1
542	3	0	1	1	1	1	1	23	1	1	2	2	23.1247	2	3	3	4	1	1	2	1	1	1	3	1	3	1	1	1	1	1
543	3	0	1	1	1	1	1	33	2	1	3	4	24.9199	3	2	4	2	2	1	1	1	1	2	4	1	3	1	1	1	1	1
544	2	0	1	1	1	1	1	34	2	1	4	4	20.9572	2	1	2	4	2	1	2	1	1	2	2	1	2	1	1	1	3	1
545	3	0	1	1	1	1	1	24	1	1	3	3	23.9188	2	3	3	1	1	2	1	1	1	1	4	1	4	1	1	1	2	1
546	1	0	1	1	1	1	2	17	1	1	4	4	20.5688	2	2	1	3	2	2	1	1	1	2	4	1	1	1	1	1	3	1
547	1	0	1	1	1	1	1	18	1	1	2	2	22.0386	2	2	3	4	1	2	1	1	1	1	2	2	3	1	1	1	1	1
548	3	0	1	1	1	1	1	23	1	1	4	4	17.5781	1	2	2	3	2	2	1	1	1	2	4	1	3	1	1	1	3	1
549	3	0	1	1	1	1	1	23	1	1	3	3	24.0346	3	2	3	1	2	2	2	1	1	1	2		3	1	1	1	1	1
550	2	0	2	1	1	1	2	23	1	1	3	3	22.0386	2	3	3	3	1	2	1	1	1	1	4	1	1	1	1	1	1	1
551	2	0	1	1	1	1	2	24	1	1	2	4	20.202	2	2	2	1	1	2	2	1	1	1	2	1	2	1	1	1	1	1
552	3	0	1	1	1	1	1	13	1	1	4	2	18.4911	1	3	1	4	1	2	1	2	1	2	4	1	3	1	1	1	3	1
553	3	0	1	1	1	1	1	22	1	1	3	3	22.4813	2	2	3	3	2	1	2	1	1	1	4	1	2	1	1	1	1	1
554	3	0	1	1	1	1	1	14	1	1	3	3	24.8603	3	2	2	2	2	1	1	1	1	2	4	1	4	1	1	1	2	1
555	3	0	1	1	1	1	1	26	2	1	2	2	17.6254	1	4	4	2	1	1	1	1	1	1	4	1	3	1	1	1	1	1
556	3	0	1	1	1	1	2	36	3	1	3	2	27.0538	3	4	2	3	2	1	1	1	1	1	4		4	2	1	1	2	2
557	3	0	1	1	1	1	1	33	2	1	3	4	24.7475	3	2	3	2	2	1	1	1	1	1	4	1	3	1	1	1	1	1
558	3	0	1	1	1	1	1	33	2	1	3	4	25.9516	3	2	2	3	1	1	2	1	1	1	4	1	2	1	1	1	1	1
559	2	0	1	1	1	2	1	30	2	2	4	4	25.6312	3	3	1	1	1	2	2	1	1	2	4	1	3	1	1	1	3	1
560	3	0	1	1	1	1	1	26	2	1	2	2	19.5717	2	3	3	3	2	2	1	1	1	1	4		3	1	1	1	1	1
561	1	0	1	1	1	1	1	21	1	1	2	2	24.7676	3	2	2	2	1	1	2	1	1	1	4	1	3	1	1	1	1	1
562	3	0	2	1	1	1	1	28	2	1	2	2	20.2848	2	4	3	1	1	2	1	1	1	2	4	1	4	1	1	1	2	1
563	3	0	1	1	1	1	1	26	2	1	2	2	19.9219	2	4	4	3	1	1	1	1	1	1	4	1	3	1	1	1	1	1
564	3	0	1	1	1	2	1	27	2	1	4	3	25.3906	3	3	3	2	2	2	1	1	1	1	4		4	1	1	1	4	1
565	1	0	1	1	1	1	1	19	1	1	2	2	20.3125	2	2	3	2	1	1	1	1	1	1	3	1	3	1	1	1	1	1
566	3	0	2	1	1	2	1	32	2	1	2	2	23.8054	2	3	3	3	1	1	2	1	1	1	3	1	3	1	1	1	1	1
567	3	0	1	1	1	1	1	23	1	1	2	2	20.4467	2	3	3	4	2	2	1	1	1	1	4		4	1	1	1	2	1
568	3	0	1	1	1	1	2	29	2	1	2	3	21.2183	2	4	4	1	1	2	1	1	1	2	4	1	3	1	1	1	1	1
569	3	0	1	1	1	1	1	29	2	1	4	4	22.6562	2	1	4	3	2	1	1	1	1	2	4	1	4	1	1	1	4	1
570	2	0	1	1	1	1	1	23	1	1	3	3	23.1911	2	3	3	1	1	2	1	1	1	1	4	1	4	1	1	1	2	1
571	3	0	1	1	1	1	1	21	1	1	3	3	19.1953	2	4	4	2	2	1	1	1	1	1	4		4	1	1	1	2	1
572	3	0	1	1	1	1	1	23	1	1	2	2	21.0938	2	4	4	2	1	1	1	1	1	1	4		3	1	1	1	1	1
573	1	0	1	1	1	1	1	29	2	1	2	3	27.5482	3	3	3	2	1	1	2	1	1	1	1	1	3	1	1	1	1	1
574	3	0	1	1	1	1	2	31	2	1	2	2	19.5167	2	3	3	4	2	1	1	1	1	1	2	1	2	1	1	1	1	1
575	3	0	1	1	1	1	1	30	2	1	2	3	17.4044	1	2	2	2	2	1	1	1	1	1	4	1	2	1	1	1	1	1
576	3	0	1	1	1	1	1	24	1	1	3	3	21.3675	2	4	4	1	1	2	1	1	1	1	4		3	1	1	1	1	1
577	2	0	1	1	1	1	1	29	2	1	3	3	21.5019	2	2	3	2	1	1	2	1	1	1	4	1	1	1	1	1	1	1
578	1	0	1	1	1	1	1	17	1	1	4	4	17.4818	1	2	1	5	1	1	2	1	1	1	1	1	4	1	1	1	4	1
579	1	0	1	1	1	1	1	11	1	1	3	4	18.3655	1	2	1	5	2	2	1	1	1	2	4	1	1	1	1	1	1	1
580	1	0	1	1	1	1	1	41	3	1	2	2	21.3593	2	4	4	3	1	1	1	1	1	1	4	2	1	1	1	1	1	1
581	2	0	1	1	1	1	1	36	3	1	2	2	23.3091	2	3	3	2	2	1	1	1	1	1	4	1	2	1	1	1	1	1
582	3	0	1	1	1	1	2	28	2	1	2	3	19.1406	2	4	3	2	1	1	1	1	1	1	4	1	3	1	1	1	1	1
583	3	0	1	1	1	1	1	24	1	1	2	2	21.2245	2	2	3	2	2	1	1	1	1	1	1	1	2	1	1	1	1	1
584	3	0	1	1	1	1	2	28	2	1	2	2	24.9135	3	4	4	3	1	1	1	1	1	1	4	1	2	2	1	1	1	1
585	3	0	1	1	1	1	1	37	3	1	4	4	21.7778	2	3	1	2	2	1	2	1	1	2	1	1	3	1	1	2	3	1
586	2	0	1	1	1	1	1	22	1	1	2	2	19.1406	2	3	3	3	1	2	1	1	1	1	4	1	1	1	1	1	1	1
587	3	0	1	1	1	1	1	25	1	1	3	3	22.4323	2	2	3	3	2	1	1	1	1	1	4	1	2	1	1	1	1	1
588	1	0	1	1	1	1	1	26	2	1	4	4	23.597	2	3	3	4	1	1	1	1	1	1	4	1	4	1	1	1	4	1
589	3	0	1	1	1	1	1	35	3	1	3	3	23.8281	2	3	3	3	1	1	1	1	1	2	4	1	4	1	1	1	2	1
590	1	0	1	1	1	1	1	28	2	1	4	4	20.3428	2	2	2	5	1	2	2	1	1	2	4	1	2	1	1	1	3	1
591	3	0	1	1	1	1	1	26	2	1	2	2	16.8889	1	2	4	1	2	2	1	1	1	1	1		2	1	1	1	1	1
592	2	0	1	1	1	1	1	24	1	1	4	4	22.8329	2	3	3	1	1	2	2	1	1	2	4	1	2	1	1	1	3	1
593	3	0	1	1	1	1	1	30	2	1	2	2	27.3356	3	2	4	2	2	1	1	1	1	1	1	1	2	1	1	1	1	1
594	2	0	1	1	1	1	1	33	2	1	3	3	20.7031	2	3	3	2	1	1	1	1	1	1	4	1	2	1	1	1	1	1
595	1	0	1	1	1	1	1	26	2	1	2	2	19.5717	2	2	3	4	1	1	1	1	1	1	3	1	3	1	1	1	1	1
596	2	1	1	1	2	2	2	22	1	1	2	2	20.9566	2	2	3	4	1	1	1	1	1	2	4	1	3	1	1	1	1	1
597	3	0	1	1	1	1	2	39	3	1	1	1	29.413	3	2	3	1	2	2	1	1	1	1	4	1	2	1	1	1	1	1
598	2	0	1	1	1	1	1	23	1	1	3	2	18.369	1	2	3	2	2	1	1	1	1	1	4	1	1	1	1	1	1	1
599	3	0	1	1	1	1	1	23	1	1	2	2	22.1453	2	2	3	1	2	2	1	1	1	1	1		2	1	1	1	1	1
600	3	0	1	1	1	1	1	36	3	1	4	4	18.591	2	2	2	3	1	1	2	1	1	2	4	1	2	1	1	1	3	1
601	3	0	1	1	1	1	1	27	2	1	3	3	29.7778	3	3	3	2	2	1	1	1	1	1	1	1	1	1	1	1	1	1
602	3	0	1	1	1	1	1	20	1	1	2	2	26.4381	3	3	3	3	2	2	2	1	1	1	3	1	3	1	1	1	1	1
603	3	1	2	1	2	1	1	18	1	1	2	2	18.8271	2	2	3	1	1	2	1	1	1	2	4	1	3	1	1	1	1	1
604	3	0	1	1	1	1	1	35	3	1	2	2	19.2277	2	4	4	3	1	1	1	1	1	2	4	1	4	1	1	1	2	1
605	3	0	1	1	1	1	2	31	2	1	2	3	21.4844	2	4	4	3	1	1	1	1	1	2	4	1	3	1	1	1	1	1
606	2	0	1	1	1	1	1	17	1	1	4	4	24.1288	3	1	1	1	2	2	1	1	1	2	4	1	1	1	1	1	3	1
607	2	0	1	1	1	1	1	26	2	1	2	2	29.9967	3	2	3	3	1	2	1	1	1	2	4	1	1	1	1	1	1	1
608	1	2	1	2	1	1	1	29	2	1	4	4	22.2656	2	3	2	3	1	2	1	1	1	1	1	1	3	1	1	1	3	1
609	3	0	1	1	1	1	1	32	2	1	2	2	20.5592	2	2	3	2	2	1	1	1	1	1	1	1	2	1	1	1	1	1
610	3	0	1	1	1	1	1	22	1	2	2	2	20.061	2	4	4	1	1	2	1	1	1	1	4	1	4	1	1	1	2	1
611	2	0	1	1	1	1	1	25	1	1	2	3	27.1203	3	2	3	3	2	2	1	1	1	1	4	1	1	1	1	1	1	1
612	2	0	1	1	1	1	1	25	1	1	2	2	20.2848	2	2	3	1	1	2	1	1	1	1	3	1	1	1	1	1	1	1
613	2	0	1	1	1	1	1	24	1	1	3	3	18.5901	2	3	3	2	1	1	2	1	1	1	4	1	2	1	1	1	1	1
614	1	0	1	1	1	1	1	31	2	1	2	3	42.4169	3	3	3	3	2	1	2	1	1	2	4	1	2	1	1	1	1	1
615	3	0	1	1	1	1	1	24	1	1	2	2	19.5312	2	4	4	2	1	1	1	1	1	1	4		3	1	1	1	1	1
616	3	0	2	1	1	2	1	30	2	1	2	3	24.0346	3	3	3	3	1	1	2	1	1	1	4	1	2	1	1	1	1	1
617	3	0	2	1	1	1	2	23	1	1	3	3	24.3418	3	3	4	4	2	2	1	1	1	1	4	1	3	1	1	1	1	1
618	3	0	1	1	1	1	1	25	1	1	2	2	21.2306	2	3	3	1	1	2	2	1	1	1	1	1	2	1	1	1	1	1
619	1	0	1	1	1	2	1	26	2	1	3	2	19.2277	2	2	3	3	1	1	1	1	1	1	1	1	3	1	1	1	1	1
620	2	0	1	1	1	1	1	23	1	1	4	3	16.0547	1	3	3	3	2	2		1	1	2	4	1	1	1	1	1	3	1
621	3	0	1	1	1	1	1	27	2	1	3	3	16.4366	1	4	4	1	1	2	1	1	1	2	4	1	3	1	1	1	1	1
622	2	0	1	1	1	1	1	31	2	2	2	2	20.1726	2	4	3	4	1	1	1	1	1	1	1	1	3	1	1	1	1	1
623	3	0	1	1	1	1	1	22	1	1	4	3	19.052	2	2	3	1	2	2	1	1	1	1	1		2	1	1	1	3	1
624	3	0	1	1	1	1	1	31	2	1	3	3	19.313	2	4	4	2	1	1	1	1	1	1	4		3	1	1	1	1	1
625	1	0	1	1	1	1	1	24	1	1	3	2	27.7671	3	2	3	3	1	1	2	1	1	1	4	1	3	1	1	1	1	1
626	1	0	1	1	1	2	2	23	1	1	2	2	34.9975	3	4	4	3	1	2	1	1	1	1	4	1	1	1	1	1	1	1
627	3	0	1	1	1	1	1	23	1	1	2	2	19.8141	2	3	4	4	1	2	2	1	1	1	4		2	1	1	1	1	1
628	3	0	1	1	1	1	1	24	1	1	2	2	28.6215	3	3	3	3	1	2	1	1	1	1	1	1	1	1	1	1	1	1
629	3	0	1	1	1	1	1	19	1	1	3	3	19.8141	2	4	2	2	2	1	1	1	1	2	4	2	3	1	1	1	1	1
630	2	0	1	1	1	1	1	13	1	1	3	2	22.7694	2	3	2	2	1	1	2	1	1	2	1	1	3	1	1	1	1	1
631	3	0	1	1	1	1	1	18	1	1	4	2	18.6667	2	3	1	4	1	2	2	1	1	2	4	1	1	1	1	1	3	1
632	3	0	1	1	1	1	1	29	2	1	3	3	21.3675	2	4	4	2	2	1	1	1	1	1	4	1	4	1	1	1	2	1
633	2	0	1	1	1	1	1	25	1	1	3	3	20.2848	2	3	3	3	1	2	2	1	1	1	4	1	2	1	1	1	1	1
634	3	0	1	1	1	1	1	27	2	1	2	2	18.3594	1	2	4	4	1	1	1	1	1	1	4		2	1	1	1	1	1
635	3	0	1	1	1	1	1	41	3	1	2	2	24.1415	3	3	3	3	2	1	1	1	1	2	1	1	2	1	1	1	1	1
636	1	2	1	2	1	1	1	29	2	1	4	3	20.83	2	3	2	1	1	2	2	1	1	2	4	1	3	1	1	1	3	1
637	3	0	1	1	1	1	2	34	2	1	3	3	19.4734	2	2	4	4	2	1	1	1	1	2	4	1	4	1	1	1	2	1
638	3	0	1	1	1	1	2	22	1	1	3	3	24.3865	3	2	3	3	2	2	2	1	1	1	4	1	2	1	1	1	1	1
639	3	0	2	1	1	1	1	24	1	1	2	2	27.0552	3	2	2	2	2	1	1	1	1	1	2		2	1	1	1	1	1
640	3	0	1	1	1	1	1	21	1	1	2	2	22.6562	2	4	4	1	1	2	1	1	1	1	4	1	3	1	1	1	1	1
641	3	0	1	1	1	1	1	21	1	1	2	3	23.7332	2	2	2	2	2	1	1	1	1	2	4	1	3	1	1	1	1	1
642	3	0	1	1	1	1	2	19	1	1	4	3	26.8386	3	2	1	2	2	1	1	1	1	2	4	1	3	1	1	2	3	1
643	1	0	1	1	1	1	1	30	2	1	2	2	17.898	1	4	4	2	2	1	2	1	1	1	1	1	1	1	1	2	1	1
644	3	0	1	1	1	1	1	29	2	1	2	2	20.8117	2	3	3	5	1	1	1	1	1	1	4	1	3	1	1	1	1	1
645	3	0	1	1	1	1	1	26	2	1	3	3	20.83	2	3	3	3	1	2	2	1	1	1	2	1	2	1	1	1	1	1
646	3	0	1	1	1	1	1	24	1	1	3	3	20.3125	2	3	3	5	2	1	2	1	1	2	2	1	3	1	1	1	1	1
647	3	0	1	1	1	2	1	31	2	1	3	2	20.4467	2	4	4	5	1	1	1	1	1	2	4	1	3	1	1	1	1	1
648	1	0	1	1	1	1	1	21	1	1	2	2	19.7239	2	2	3	4	1	1	1	1	1	2	1	1	3	1	1	1	1	1
649	3	0	1	1	1	1	1	16	1	1	1	3	24.5089	3	2	2	4	1	1	2	1	1	2	4	1	1	1	1	1	1	1
650	3	0	1	1	1	1	1	30	2	1	4	4	26.6728	3	2	2	4	2	1	1	1	1	2	4	1	4	1	1	1	4	1
651	3	0	1	1	1	1	1	27	2	1	2	2	21.6797	2	3	3	3	2	1	2	1	1	1	3	1	2	1	1	1	1	1
652	3	0	1	1	1	1	1	27	2	1	2	2	17.7778	1	3	3	3	2	2	1	1	1	1	3	1	3	1	1	1	1	1
653	3	0	1	1	1	1	1	41	3	1	1	1	21.2306	2	3	3	4	2	1	1	1	1	1	1	1	2	1	1	1	1	1
654	3	0	1	1	1	2	1	37	3	1	4	4	21.6713	2	2	2	2	2	1	2	1	1	2	4		3	1	1	1	3	1
655	1	0	1	1	1	2	1	30	2	1	1	2	20.3428	2	3	3	4	1	1	1	1	1	2	3	1	3	1	1	1	1	1
656	2	0	1	1	1	1	1	31	2	1	2	2	23.6128	2	3	3	1	2	1	2	1	1	1	4	1	2	1	1	1	1	1
657	3	0	1	1	1	1	2	28	2	1	1	3	23.5666	2	3	2	3	1	1	2	1	1	1	4	1	2	1	1	1	1	1
658	3	0	1	1	1	1	1	33	2	1	2	2	22.6562	2	4	4	3	1	1	1	1	1	1	4		2	1	1	1	1	1
659	2	0	1	1	1	1	1	19	1	2	1	1	25.8022	3	2	2	5	1	1	1	1	1	2	1	1	3	1	1	1	1	1
660	3	0	1	1	1	1	1	34	2	1	2	2	18.6667	2	3	3	2	2	1	2	1	1	2	4	1	4	1	1	1	2	1
661	1	0	1	1	1	2	2	27	2	1	3	2	21.0962	2	3	2	1	1	2	1	1	1	1	3	1	3	1	1	1	1	1
662	3	0	1	1	1	1	2	30	2	1	4	4	22.0604	2	1	1	4	1	1	2	1	1	2	3	1	3	1	1	1	3	1
663	2	0	1	1	1	1	1	31	2	1	2	2	18.7305	2	3	3	3	2	1	2	1	1	1	4	1	2	1	1	1	1	1
664	3	0	1	1	1	1	1	28	2	1	2	2	22.9874	2	3	3	3	1	1	1	1	1	1	1	1	2	1	1	1	1	1
665	3	0	1	1	1	1	2	31	2	1	2	2	19.5312	2	3	3	3	1	1	2	2	1	1	3	1	3	1	1	1	1	1
666	3	0	1	1	1	1	1	31	2	1	3	2	27.0552	3	3	3	5	1	1	2	1	1	1	3	1	3	1	1	2	1	1
667	3	0	1	1	1	1	1	16	1	1	2	2	24.3418	3	2	3	1	2	2	1	1	1	1	2		2	1	1	1	1	1
668	1	0	1	1	1	1	1	11	1	1	4	4	21.2084	2	2	1	5	1	2	1	1	1	2	4	1	3	1	1	1	3	1
669	3	0	1	1	1	1	1	21	1	1	2	2	18.2899	1	4	4	2	1	1	1	1	1	1	4	1	4	1	1	1	2	1
670	1	0	1	1	1	1	1	19	1	1	4	4	24	3	1	1	4	2	1	1	1	1	2	3	1	3	1	1	1	3	1
671	1	0	1	1	1	1	1	24	1	1	4	4	22.2137	2	2	2	2	2	2	2	1	1	1	1	1	3	1	1	1	3	1
672	3	0	1	1	1	1	2	30	2	1	3	4	17.5781	1	2	3	2	2	1	2	1	1	1	4		2	1	1	1	1	1
673	3	0	1	1	1	1	1	22	1	1	3	4	28.6851	3	3	3	1	2	2	2	1	1	1	4	1	4	1	1	1	2	1
674	1	0	1	1	1	1	1	25	1	1	4	4	17.898	1	2	3	3	1	2	1	1	1	1	1	1	3	1	1	1	3	1
675	3	1	1	1	2	1	2	30	2	1	2	3	22.4766	2	4	4	2	1	1	1	1	1	1	4		4	1	1	1	2	1
676	3	0	1	1	1	1	1	22	1	1	2	3	26.4381	3	2	4	1	2	2	1	1	1	1	4	1	3	1	1	1	1	1
677	2	0	1	1	1	1	1	37	3	1	3	3	21.0077	2	2	3	2	1	1	1	1	1	1	4	1	4	1	1	1	2	1
678	3	0	1	1	1	1	1	25	1	1	3	3	22.4813	2	4	4	3	1	1	1	1	1	2	4	1	3	1	1	1	1	1
679	1	0	1	1	1	1	1	20	1	1	2	3	20.3125	2	3	3	1	1	1	1	1	1	1	1	1	3	1	1	1	1	1
680	1	0	1	1	1	1	1	31	2	1	1	3	25.3906	3	2	2	5	1	1	1	1	1	2	1	1	3	1	1	1	1	1
681	3	0	1	1	1	1	1	27	2	1	3	3	16.2331	1	4	4	3	2	2	1	1	1	2	1	1	2	1	1	1	1	1
682	3	0	1	1	1	1	1	19	1	1	2	2	23.2335	2	3	3	1	1	2	1	1	1	1	4		3	1	1	1	1	1
683	3	0	1	1	1	2	1	26	2	1	2	2	26.3535	3	2	4	2	1	1	1	1	1	1	4	1	3	1	1	1	1	1
684	3	0	1	1	1	1	1	29	2	1	3	3	19.6235	2	4	4	3	2	1	1	1	1	2	4	1	4	1	1	1	2	1
685	1	0	1	1	1	1	1	28	2	1	2	2	28.3039	3	4	3	4	1	1	1	1	1	2	4	1	1	1	1	1	1	1
686	3	0	1	1	1	1	1	27	2	1	4	4	22.5827	2	2	4	1	2	2	1	1	1	1	2	1	2	1	1	1	3	1
687	3	0	1	1	1	1	1	15	1	1	3	4	27.1816	3	1	2	2	2	1	1	1	1	2	4	1	4	1	1	1	2	1
688	3	0	1	1	1	2	1	38	3	1	2	2	22.2222	2	4	4	4	1	1	1	2	1	1	2	1	4	1	1	1	2	1
689	3	0	1	1	1	1	1	17	1	1	1	3	22.151	2	2	1	3	2	1	1	1	1	2	3	1	4	1	1	1	2	1
690	1	0	1	1	1	1	1	30	2	1	3	3	19.3821	2	3	3	3	1	1	1	1	1	2	4	1	1	1	1	1	1	1
691	3	0	1	1	1	1	1	26	2	1	4	4	23.5304	2	3	3	2	1	2	2	1	1	1	4	1	2	1	1	1	3	1
692	2	0	1	1	1	1	1	21	1	1	3	3	22.0317	2	3	3	1	1	2	1	1	1	1	4	1	1	1	1	1	1	1
693	3	0	1	1	1	1	1	32	2	1	3	3	20.0288	2	3	3	3	2	2	1	1	1	1	1		2	1	1	1	1	1
694	2	0	1	1	1	1	1	26	2	2	3	3	19.9792	2	3	3	3	1	1	2	1	1	1	4	1	2	1	1	1	1	1
695	3	0	1	1	1	1	1	34	2	2	2	2	22.8928	2	4	4	3	2	1	1	1	1	1	4		3	1	1	1	1	1
696	3	0	1	1	1	1	1	22	1	1	2	2	28.0404	3	3	3	3	2	2	1	1	1	1	1	1	2	1	1	1	1	1
697	3	0	1	1	1	1	1	16	1	1	4	4	20.2848	2	3	1	1	1	2	2	1	1	2	4	1	3	1	1	1	3	1
698	1	0	1	1	1	1	2	23	1	1	4	4	23.9512	2	1	3	1	1	2	2	1	1	1	1	2	2	1	1	1	3	1
699	3	0	1	1	1	1	2	30	2	1	2	2	23.7812	2	4	4	3	2	1	1	1	1	2	1	1	2	2	1	1	1	1
700	1	0	1	1	1	1	1	22	1	1	3	3	22.0604	2	2	3	4	1	1	1	1	1	1	4	1	1	1	1	1	1	1
701	1	0	1	1	1	1	1	24	1	1	2	2	32.0461	3	2	2	1	1	1	1	1	1	2	1	1	3	1	1	1	1	1
702	3	0	1	1	1	1	1	26	2	2	3	3	24.0055	3	2	3	1	1	2	1	1	1	1	4	1	4	1	1	1	2	1
703	3	0	1	1	1	2	1	34	2	1	3	3	23.1911	2	4	4	2	2	1	1	1	1	1	1	1	2	1	1	1	1	1
704	3	0	1	1	1	1	2	41	3	1	1	2	22.0386	2	2	3	2	2	1	1	1	1	1	3	1	2	2	1	1	1	1
705	3	0	1	1	1	1	1	31	2	1	2	2	20.1951	2	4	4	3	2	2	1	1	1	1	4	1	2	1	1	2	1	1
706	2	0	2	1	1	1	1	36	3	1	2	2	22.6562	2	2	3	4	1	1	1	1	1	1	4	1	1	1	1	1	1	1
707	2	0	2	1	1	1	1	29	2	1	2	4	42.9688	3	2	3	1	1	2	2	1	1	1	1	1	2	1	1	1	1	1
708	3	0	1	1	1	2	2	28	2	1	4	4	18.0802	1	3	3	3	1	1	1	1	1	1	4	1	3	1	1	1	3	1
709	2	0	1	1	1	1	1	20	1	1	3	3	18.8189	2	3	3	1	1	2	1	1	1	1	4	1	1	1	1	1	1	1
710	3	0	2	1	1	1	1	27	2	1	2	2	21.875	2	4	4	2	1	1	1	1	1	1	4	1	3	1	1	1	1	1
711	1	0	1	1	1	1	2	20	1	1	3	3	18.7305	2	3	2	1	1	2	2	1	1	1	1	1	4	1	1	1	2	1
712	2	0	1	1	1	1	1	25	1	1	3	3	20.5457	2	3	3	4	1	1	1	1	1	2	4	1	1	1	1	1	1	1
713	3	0	1	1	1	1	1	26	2	1	2	2	24.577	3	3	3	3	1	1	1	1	1	1	1	1	2	1	1	1	1	1
714	3	0	1	1	1	1	1	34	2	1	2	2	18.8189	2	3	3	3	1	1	1	1	1	2	4	1	3	1	1	1	1	1
715	2	0	1	1	1	1	1	33	2	1	2	3	19.9792	2	3	3	3	2	1	1	1	1	1	4	1	3	1	1	1	1	1
716	3	0	1	1	1	1	1	27	2	1	2	2	28.1969	3	4	4	3	1	1	1	1	1	1	4	1	3	1	1	1	1	1
717	3	0	1	1	1	1	1	25	1	1	2	2	22.719	2	3	3	4	1	2	1	1	1	1	3	1	3	1	1	1	1	1
718	3	0	1	1	1	1	1	25	1	1	2	2	24	3	3	3	3	2	2	1	1	1	1	4		2	1	1	1	1	1
719	3	0	1	1	1	1	1	30	2	1	2	2	26.5625	3	4	4	3	1	1	1	1	1	1	4	1	4	1	1	1	2	1
720	3	0	1	1	1	1	1	24	1	1	4	4	21.875	2	1	3	2	2	1	2	1	1	1	4	1	4	1	1	1	4	1
721	1	0	1	1	1	1	1	28	2	1	2	2	18.8707	2	3	2	2	1	1	1	1	1	1	1	1	4	1	1	1	2	1
722	3	0	1	1	1	1	1	29	2	1	2	2	21.4536	2	3	3	3	1	1	1	1	1	1	4		3	1	1	1	1	1
723	1	0	1	1	1	1	1	24	1	1	2	3	23.1111	2	2	3	5	1	1	1	1	1	1	1	1	3	1	1	1	1	1
724	3	0	1	1	1	1	1	23	1	1	2	2	24.6094	3	3	3	3	2	1	2	1	1	1	2	1	4	1	1	1	2	1
725	3	0	1	1	1	1	1	33	2	1	2	2	20.9644	2	2	4	2	1	1	2	1	1	1	4		3	1	1	1	1	1
726	3	0	1	1	1	1	2	24	1	1	2	2	24.4646	3	4	4	1	1	2	1	1	1	2	4	1	3	1	1	1	1	1
727	3	0	1	1	1	1	1	31	2	1	2	2	22.719	2	3	3	3	1	1	2	1	1	1	2	2	2	1	1	1	1	1
728	2	0	1	1	1	1	1	31	2	1	3	3	25.3444	3	3	2	5	2	1	1	1	1	1	4	1	3	1	1	1	1	1
729	3	0	1	1	1	1	1	24	1	1	3	3	18.6709	2	1	2	1	2	2	1	1	1	1	4	1	4	1	1	1	2	1
730	3	0	1	1	1	1	1	23	1	1	4	4	27.8876	3	4	4	2	2	1	1	1	1	1	2	1	2	1	1	1	3	1
731	2	0	1	1	1	1	1	11	1	1	4	3	22.0386	2	2	1	3	2	2	2	1	1	2	4	1	3	1	1	1	3	1
732	3	0	1	1	1	1	1	21	1	1	3	4	24.1588	3	3	3	3	2	2	2	1	1	1	4		2	1	1	1	1	1
733	2	0	1	1	1	1	1	31	2	1	4	4	19.1467	2	2	2	1	1	1	1	1	1	1	4	1	4	1	1	1	4	1
734	3	0	1	1	1	1	1	26	2	1	3	3	24.0346	3	3	4	3	2	2	1	1	1	1	1	1	2	1	1	2	1	1
735	3	0	1	1	1	1	1	19	1	1	3	3	22.2222	2	2	3	1	1	2	1	1	1	1	1	1	1	1	1	1	1	1
736	3	0	1	1	1	1	1	18	1	1	4	4	19.433	2	1	1	2	2	1	1	1	1	2	4	1	4	1	1	1	4	1
737	1	0	2	1	1	1	1	27	2	1	2	2	20.4491	2	2	3	3	1	1	1	1	1	2	1	1	3	1	1	1	1	1
738	3	0	1	1	1	1	1	29	2	1	2	4	24.0346	3	2	3	3	1	1	2	1	1	1	3	1	2	1	1	1	1	1
739	3	0	2	1	1	1	1	25	1	1	3	3	29.1363	3	2	3	4	2	1	1	1	1	2	4	1	3	1	1	1	1	1
740	3	0	1	1	1	1	1	19	1	1	1	4	24.8889	3	1	2	2	2	1	1	1	1	2	4	1	4	1	1	1	2	1
741	3	2	1	2	1	1	1	30	2	1	2	2	22.719	2	3	3	4	1	1	1	1	1	1	3	1	2	1	1	1	1	1
742	3	0	1	1	1	1	1	33	2	1	4	4	24.2188	3	3	3	4	2	1	2	1	1	1	1	1	5	1	1	1	4	1
743	3	2	1	2	2	1	2	31	2	1	2	2	19.7777	2	4	4	3	1	1	1	1	1	2	4	1	3	1	1	1	1	1
744	3	0	1	1	1	1	1	19	1	1	3	3	23.4375	2	2	2	2	1	1	2	1	1	2	4		1	1	1	1	1	1
745	3	0	1	1	1	1	1	20	1	1	3	3	22.8329	2	3	3	3	1	2	1	1	1	1	4		3	1	1	1	1	1
746	3	0	1	1	1	2	1	36	3	1	2	3	23.7332	2	4	4	1	2	2	1	1	1	1	4	1	4	1	1	1	2	1
747	3	0	1	1	1	1	1	24	1	1	2	3	19.5556	2	4	4	1	1	2	1	1	1	2	4	1	3	1	1	1	1	1
748	3	0	1	1	1	1	1	24	1	1	2	2	21.4844	2	4	4	2	1	1	1	1	1	1	2	1	3	1	1	1	1	1
749	1	0	1	1	1	1	2	23	1	1	3	4	38.9739	3	3	3	4	2	2	2	1	1	1	1	1	3	1	1	1	1	1
750	2	0	1	1	1	1	1	37	3	1	1	1	20.0777	2	2	3	4	1	1	1	1	1	1	4	1	3	1	1	1	1	1
751	3	0	1	1	1	1	2	25	1	1	4	4	17.4251	1	2	2	1	1	2	1	1	1	1	4	1	3	1	1	1	3	1
752	3	0	1	1	1	1	1	29	2	1	2	3	26.0375	3	2	3	4	1	1	2	1	1	2	4	1	3	1	1	1	1	1
753	3	0	1	1	1	1	1	28	2	1	4	4	22.2656	2	2	2	3	1	1	2	1	1	1	4		2	1	1	1	3	1
754	3	2	1	2	1	1	2	20	1	1	3	3	23.8751	2	3	3	4	1	1	1	1	1	1	4	1	3	1	1	1	1	1
755	3	0	1	1	1	2	1	22	1	1	3	3	18.2563	1	3	3	1	2	1	2	1	1	2	4	1	4	1	1	1	2	1
756	3	0	2	1	1	1	2	27	2	1	2	3	24.0055	3	4	4	1	1	2	1	1	1	1	2	1	3	1	1	1	1	1
757	3	0	1	1	1	1	1	25	1	1	2	2	22.5827	2	4	4	1	1	2	1	1	1	1	1	1	3	1	1	1	1	1
758	3	2	1	2	1	1	2	26	2	1	3	4	25.2363	3	2	2	1	2	2	1	1	1	2	4		4	1	1	1	2	1
759	3	0	1	1	1	1	1	23	1	1	2	2	28.0404	3	3	3	2	2	1	2	1	1	1	4	1	2	1	1	1	1	1
760	3	0	1	1	1	1	1	28	2	1	3	3	20.3125	2	3	4	3	1	2	1	1	1	1	4	1	2	1	1	1	1	1
761	3	0	1	1	1	1	1	24	1	1	2	2	21.6311	2	3	3	3	2	2	2	1	1	1	4		2	1	1	1	1	1
762	3	0	1	1	1	2	1	30	2	1	2	2	22.0741	2	3	3	4	1	1	1	1	1	1	4		3	1	1	1	1	1
763	3	0	1	1	1	1	1	25	1	1	2	2	18.6115	2	3	3	3	1	1	2	1	1	1	4		3	1	1	1	1	1
764	3	0	1	1	1	1	1	33	2	1	2	2	22.2063	2	3	3	4	1	1	1	1	1	1	2	1	3	1	1	1	1	1
765	2	0	1	1	1	1	1	30	2	1	4	4	49.5536	3	1	3	1	1	2	2	1	1	1	1	1	3	1	1	1	3	1
766	3	0	1	1	1	1	1	38	3	1	2	2	23.0469	2	4	4	2	1	1	1	1	1	1	4		4	1	1	1	2	1
767	3	0	1	1	1	2	1	42	3	1	3	3	19.9432	2	2	2	3	2	1	2	1	1	1	4	1	4	1	1	1	2	1
768	3	0	1	1	1	1	1	16	1	1	3	4	18.3655	1	3	2	1	2	2	2	1	1	2	4	1	1	1	1	1	1	1
769	3	0	1	1	1	1	1	32	2	1	3	3	26.5625	3	2	4	3	1	1	1	1	1	1	4	1	2	1	1	1	1	1
770	3	0	1	1	1	1	1	31	2	1	3	3	24.6094	3	2	3	1	2	2	1	1	1	1	1	1	2	1	1	1	1	1
771	3	0	1	1	1	1	1	36	3	1	2	2	18.4911	1	4	4	2	1	1	1	1	1	1	3	1	3	1	1	1	1	1
772	3	0	1	1	1	1	1	32	2	1	3	2	22.1893	2	3	3	1	1	2	1	1	1	2	4	1	3	1	1	1	1	1
773	3	0	1	1	1	1	1	34	2	1	2	2	21.0828	2	3	3	5	2	1	1	1	1	2	1	1	2	1	1	1	1	1
774	3	0	1	1	1	1	1	31	2	1	3	3	21.3382	2	2	2	3	2	1	1	1	1	1	4		4	1	1	1	2	1
775	2	0	1	1	1	1	1	27	2	1	4	4	21.7784	2	2	2	1	1	2	2	1	1	1	4	1	2	1	1	2	3	1
776	3	0	1	1	1	1	1	28	2	1	2	3	20.5457	2	3	3	2	2	1	2	1	1	1	1	1	4	1	1	1	2	1
777	3	0	1	1	1	1	2	25	1	1	2	3	22.8624	2	2	4	1	2	2	1	1	1	1	4	1	3	2	1	1	1	1
778	3	0	1	1	1	1	1	21	1	1	3	3	24.977	3	2	3	3	1	2	2	1	1	1	4	1	2	1	1	1	1	1
779	3	0	1	1	1	1	1	22	1	1	4	4	14.4208	1	3	3	3	2	2	1	1	1	1	1	1	2	1	1	2	3	1
780	1	0	1	1	1	1	1	31	2	1	4	3	20.4876	2	3	2	4	2	1	1	1	1	1	1	2	3	1	1	1	3	1
781	2	0	1	1	1	1	1	21	1	1	3	3	18.0802	1	3	3	3	1	2	1	1	1	1	4	1	1	1	1	1	1	1
782	3	1	1	1	2	1	1	23	1	1	2	3	17.4818	1	4	4	1	1	2	1	1	1	2	4	1	4	1	1	1	2	1
783	3	0	2	1	1	1	1	23	1	1	2	2	20.7031	2	4	4	1	1	2	1	1	1	1	4	1	3	1	1	1	1	1
784	3	0	1	1	1	1	1	20	1	1	3	3	17.6309	1	3	3	3	2	2	1	1	1	1	1	1	2	1	1	2	1	1
785	3	0	2	1	1	1	1	28	2	1	4	3	20.0288	2	4	4	1	2	2	1	1	1	1	4		3	1	1	1	3	1
786	3	0	1	1	1	1	1	21	1	1	2	2	23.4375	2	3	3	3	2	2	1	1	1	1	4	1	3	1	1	1	1	1
787	3	0	1	1	1	1	1	27	2	1	2	2	21.1111	2	3	3	4	2	1	1	1	1	2	1	1	2	1	1	2	1	1
788	1	0	1	1	1	1	2	25	1	1	2	3	20.3954	2	2	3	4	1	2	1	2	1	1	3	1	3	1	1	1	1	1
789	3	0	2	1	1	1	1	30	2	1	2	2	18.7305	2	3	3	3	2	2	1	1	1	1	4	1	2	1	1	1	1	1
790	1	0	1	1	1	2	1	28	2	1	3	3	22.0317	2	4	3	1	1	2	1	1	1	1	1	1	3	1	1	1	1	1
791	3	0	1	1	1	1	1	27	2	1	2	2	27.0051	3	3	3	3	2	2	2	1	1	1	2	1	3	1	1	1	1	1
792	2	0	1	1	1	1	1	26	2	1	2	2	20.202	2	2	3	4	1	2	1	1	1	1	4	2	2	1	1	1	1	1
793	3	0	2	1	1	1	2	24	1	1	2	2	30.863	3	4	4	2	1	1	1	1	1	2	4	1	3	1	1	1	1	1
794	1	0	1	1	1	1	1	17	1	2	4	2	18.902	2	3	2	1	2	2	2	1	1	2	4	1	3	1	1	1	3	1
795	1	0	1	1	1	1	1	26	2	1	2	2	19.8347	2	2	3	2	1	1	2	1	1	1	1	1	3	1	1	1	1	1
796	3	0	1	1	1	1	2	22	1	1	2	2	21.0303	2	3	3	4	1	2	1	1	1	2	4	1	3	1	1	1	1	1
797	3	0	1	1	1	1	1	18	1	1	2	3	19.052	2	3	3	3	1	2	1	1	1	1	4	1	1	1	1	1	1	1
798	3	0	1	1	1	1	1	24	1	1	4	4	21.5019	2	2	2	1	1	2	1	1	1	1	4		3	1	1	1	3	1
799	2	0	1	1	1	1	1	30	2	1	4	4	21.0517	2	2	2	2	1	1	2	1	1	1	4	1	3	1	1	1	3	1
800	1	0	1	1	1	1	1	18	1	1	4	4	21.7193	2	1	1	1	1	2	2	1	1	2	4	1	1	1	1	1	3	1
801	3	0	1	1	1	1	1	30	2	1	2	2	18.902	2	2	3	2	2	1	1	1	1	1	1	1	2	1	1	1	1	1
802	3	0	1	1	1	1	1	29	2	1	3	3	20.7031	2	4	4	5	1	1	1	1	1	1	4	1	3	1	1	1	1	1
803	1	0	1	1	1	1	1	22	1	1	2	3	18.9619	2	3	3	4	1	2	1	1	1	1	3	1	3	1	1	1	1	1
804	3	0	1	1	1	1	1	33	2	1	2	2	22.2656	2	4	4	4	1	1	1	1	1	1	1	1	2	1	1	1	1	1
805	3	0	1	1	1	1	1	23	1	1	4	4	20.3125	2	2	2	1	1	2	2	1	1	1	2	1	2	1	1	1	3	1
806	1	0	1	1	1	1	1	30	2	1	3	2	24.0346	3	4	4	1	2	1	1	1	1	1	4	1	1	1	1	1	1	1
807	1	0	1	1	1	1	1	31	2	2	4	4	21.2183	2	1	1	2	2	1	2	1	1	1	4	1	1	1	1	1	3	1
808	3	0	1	1	1	2	2	20	1	1	3	3	23.2335	2	2	4	1	2	2	1	1	1	1	4	1	3	1	1	1	1	1
809	2	0	1	1	1	1	1	30	2	1	2	2	20.061	2	2	4	4	1	1	1	1	1	2	1	1	2	1	1	1	1	1
810	3	0	1	1	1	1	1	29	2	1	2	3	22.5466	2	2	2	1	1	2	1	1	1	1	4	1	3	1	1	1	1	1
811	3	0	1	1	1	1	1	24	1	1	2	2	22.8928	2	4	4	4	1	1	1	1	1	1	4	1	3	1	1	1	1	1
812	3	0	2	1	1	1	1	24	1	1	3	2	18.1955	1	2	4	3	2	1	1	1	1	1	4	1	4	1	1	1	2	1
813	3	0	1	1	1	1	1	33	2	1	3	3	23.8281	2	2	2	2	2	1	2	1	1	2	1	1	1	1	1	1	1	1
814	3	0	1	1	1	1	1	28	2	1	2	2	19.6283	2	1	3	3	2	1	1	1	1	1	4	1	2	1	1	1	1	1
815	3	0	1	1	1	1	1	32	2	1	2	3	32.6905	3	4	4	2	1	1	1	1	1	1	4	1	4	1	1	1	2	1
816	1	0	1	1	1	2	2	22	1	1	2	2	24.4444	3	3	3	1	2	2	1	1	1	1	4	1	3	1	1	1	1	1
817	3	0	1	1	1	1	1	25	1	1	2	3	26.8352	3	4	4	1	1	2	1	1	1	2	4	1	4	1	1	1	2	1
818	3	0	1	1	1	1	1	24	1	1	2	2	27.8876	3	3	3	3	1	2	1	1	1	1	4		3	1	1	1	1	1
819	3	0	1	1	1	1	1	28	2	1	2	2	29.0487	3	2	3	2	2	1	1	1	1	1	1	1	2	1	1	1	1	1
820	3	0	1	1	1	1	1	11	1	1	4	4	18.3143	1	3	1	3	1	2	2	1	1	2	3	1	1	1	1	1	3	1
821	3	0	1	1	1	1	1	19	1	1	2	2	20.7008	2	3	3	3	1	2	1	1	1	2	1	1	2	1	1	1	1	1
822	3	0	1	1	1	1	1	20	1	1	2	2	24.1415	3	3	3	2	2	1	2	1	1	2	1	1	3	1	1	1	1	1
823	3	0	2	1	1	1	1	24	1	1	2	3	20.5457	2	3	3	3	1	2	1	1	1	1	4		3	1	1	1	1	1
824	2	0	1	1	1	1	1	23	1	2	3	4	15.4056	1	2	3	2	1	1	2	1	1	1	4	1	3	1	1	1	1	1
825	1	0	1	1	1	1	1	26	2	1	2	2	19.5312	2	2	3	4	1	1	1	1	1	1	3	1	3	1	1	1	1	1
826	3	2	1	2	1	1	1	30	2	1	2	2	22.6811	2	4	3	4	2	1	1	1	1	1	4		3	1	1	1	1	1
827	1	0	1	1	1	1	1	20	1	1	3	2	21.6713	2	3	3	5	1	2	1	1	1	1	4	1	3	1	1	1	1	1
828	3	0	1	1	1	1	1	24	1	1	3	2	27.2392	3	3	3	4	1	1	1	1	1	1	4	1	3	1	1	1	1	1
829	3	0	1	1	1	1	2	24	1	1	2	3	19.0677	2	2	4	1	1	2	1	1	1	2	4		4	1	1	1	2	1
830	1	0	1	1	1	1	1	36	3	1	4	4	23.3091	2	1	2	2	1	1	1	1	1	1	1	1	3	1	1	1	3	1
831	1	0	1	1	1	1	1	33	2	1	1	3	33.7325	3	2	2	5	2	1	2	2	1	2	1	1	3	1	1	1	1	1
832	1	0	1	1	1	1	1	28	2	1	4	4	22.5827	2	2	2	5	1	1	1	1	1	2	1	1	4	1	1	1	4	1
833	2	0	1	1	1	2	1	13	1	1	4	3	20.8889	2	2	1	1	2	2	2	1	1	2	1	1	3	1	1	1	3	1
834	1	0	1	1	1	1	2	10	1	1	4	2	18.026	1	2	1	5	1	2	2	2	1	2	1	1	3	1	1	1	3	1
835	3	0	1	1	1	1	2	25	1	1	4	3	27.852	3	2	3	2	2	1	1	1	1	1	4	1	4	1	1	1	4	1
836	3	0	1	1	1	1	1	29	2	1	3	4	24.6548	3	2	4	3	2	1	1	1	1	2	4	1	4	1	1	1	2	1
837	3	0	2	1	1	1	1	25	1	1	2	3	39.0625	3	2	3	4	1	1	2	1	1	1	4	1	2	1	2	1	1	1
838	3	0	1	1	1	2	1	27	2	1	3	3	22.1893	2	4	4	2	2	1	1	1	1	1	4	1	4	1	1	1	2	1
839	3	0	1	1	1	1	1	22	1	1	3	2	17.8506	1	4	4	1	1	2	1	1	1	2	4	1	3	1	1	1	1	1
840	3	0	1	1	1	1	1	20	1	1	2	3	20.9644	2	4	4	1	1	2	1	1	1	1	4		3	1	1	1	1	1
841	1	0	1	1	1	1	1	24	1	1	4	4	20.0288	2	2	2	1	1	2	2	1	1	1	4	1	2	1	1	1	3	1
842	3	0	1	1	1	1	1	25	1	1	2	2	17.4044	1	3	3	4	1	2	2	1	1	1	4	1	2	1	1	1	1	1
843	3	0	1	1	1	1	1	28	2	1	2	2	19.8141	2	2	4	2	2	1	1	1	1	1	2	1	2	1	1	1	1	1
844	3	0	1	1	1	1	1	31	2	1	2	2	18.8271	2	2	4	3	1	1	1	1	1	1	4	1	2	1	1	1	1	1
845	3	0	2	1	1	1	1	26	2	1	3	3	16.8475	1	3	3	1	1	2	1	1	1	1	4	1	3	1	1	1	1	1
846	2	0	1	1	1	1	1	26	2	1	2	2	25	3	2	2	3	1	2	1	1	1	1	2	1	2	1	1	1	1	1
847	3	0	1	1	1	1	1	32	2	1	3	3	24.0055	3	3	3	2	2	1	2	1	1	1	4	1	3	1	1	1	1	1
848	3	0	1	1	1	1	1	29	2	1	2	3	23.8054	2	2	3	3	1	1	2	1	1	1	3	1	3	1	1	1	1	1
849	1	0	1	1	1	1	1	23	1	1	3	2	21.4536	2	2	2	3	1	2	1	1	1	2	4	1	3	1	1	1	1	1
850	3	0	1	1	1	1	1	29	2	1	3	3	22.0317	2	2	2	4	2	1	1	1	1	1	4		4	1	1	1	2	1
851	3	0	1	1	1	1	1	30	2	1	3	2	26.6728	3	2	4	2	2	1	1	1	1	1	4		4	1	1	1	2	1
852	1	0	1	1	1	1	1	25	1	1	2	2	23.4375	2	2	3	5	1	1	1	1	1	1	4	1	3	1	1	1	1	1
853	3	0	1	1	1	1	1	24	1	1	3	3	18.902	2	4	4	2	1	1	1	1	1	1	4	1	3	1	1	1	1	1
854	3	0	1	1	1	1	1	18	1	1	1	2	22.6003	2	2	2	4	2	1	1	1	1	2	4	1	3	1	1	1	1	1
855	3	0	1	1	1	1	1	26	2	1	2	2	27.5312	3	3	3	4	1	1	2	1	1	1	3		3	1	1	1	1	1
856	1	0	1	1	1	1	1	11	1	1	4	4	20.7008	2	2	1	5	1	2	1	1	1	2	4	1	4	1	1	1	4	1
857	2	0	1	1	1	1	1	26	2	1	2	2	24.4444	3	2	3	4	1	1	1	1	1	1	2	1	3	1	1	1	1	1
858	3	0	1	1	1	1	1	17	1	1	2	2	17.7778	1	2	3	1	1	2	1	1	1	1	1	1	2	1	1	1	1	1
859	3	0	1	1	1	1	1	26	2	1	4	4	19.5717	2	2	2	1	2	2	2	1	1	1	3		2	1	1	1	3	1
860	3	0	1	1	1	1	1	23	1	1	3	2	23.7332	2	2	2	3	2	1	1	1	1	1	4	1	4	1	1	2	2	1
861	1	0	1	1	1	1	1	10	1	1	1	2	20.8117	2	3	2	1	1	1	1	1	1	2	1	1	3	1	1	1	1	1
862	3	0	1	1	1	1	1	17	1	1	3	4	21.7555	2	1	3	1	2	2	1	1	1	1	4	1	4	1	1	1	2	1
863	2	0	1	1	1	2	2	25	1	1	2	2	22.8928	2	3	3	1	2	1	2	1	1	1	4	1	3	1	1	1	1	1
864	3	0	1	1	1	1	1	33	2	1	3	3	23.7332	2	3	2	3	2	1	1	1	1	1	4	1	4	1	1	1	2	1
865	2	0	1	1	1	1	1	33	2	1	1	1	21.6441	2	3	3	2	1	1	2	1	1	1	4	1	2	1	1	1	1	1
866	3	0	1	1	1	1	1	27	2	1	4	2	19.5312	2	3	3	3	1	1	1	1	1	1	4	1	3	1	1	1	3	1
867	3	0	1	1	1	1	1	23	1	1	2	2	16.5289	1	4	4	3	1	1	1	1	1	2	1	1	1	1	1	1	1	1
868	3	0	1	1	1	2	1	28	2	1	3	3	19.5717	2	3	3	2	2	1	1	1	1	1	4	1	2	1	1	1	1	1
869	3	0	1	1	1	1	2	38	3	1	3	3	22.8516	2	3	3	4	1	1	1	1	1	2	1	1	2	2	1	1	1	1
870	3	0	1	1	1	2	2	34	2	1	3	4	15.0597	1	3	2	2	1	1	1	1	1	1	1	1	2	1	1	1	1	1
871	3	0	1	1	1	1	1	30	2	1	4	4	15.427	1	2	2	2	1	2	2	1	1	1	2	1	2	1	1	1	3	1
872	1	0	1	1	1	1	1	30	2	1	3	4	26.6667	3	2	2	2	1	1	2	1	1	2	4	1	4	1	1	1	2	1
873	3	0	1	1	1	1	1	27	2	1	2	2	22.213	2	3	2	3	1	1	1	1	1	1	4	1	3	1	1	1	1	1
874	1	0	2	1	1	1	1	18	1	1	2	2	21.3593	2	3	3	5	1	2	1	1	1	1	4	1	3	1	1	1	1	1
875	1	0	1	1	1	1	2	34	2	1	2	2	30.3593	3	2	3	1	1	2	1	1	1	2	4	1	3	1	1	1	1	1
876	3	0	1	1	1	1	1	34	2	1	1	1	19.052	2	4	4	2	2	1	1	1	1	1	3		2	1	1	1	1	1
877	1	0	1	1	1	1	1	15	1	1	4	4	20.5693	2	1	1	2	1	2	2	1	1	2	4	1	1	1	1	1	3	1
878	3	0	1	1	1	1	1	35	3	1	4	4	26.3465	3	1	1	2	2	1	1	1	1	2	1	1	1	1	1	1	3	1
879	3	0	1	1	1	1	2	23	1	1	3	3	22.719	2	3	3	4	1	1	1	1	1	2	1	1	2	1	1	1	1	1
880	3	0	1	1	1	1	1	18	1	1	2	2	20.7031	2	3	3	3	2	2	2	1	1	1	4	1	2	1	1	1	1	1
881	3	0	1	1	1	1	2	45	3	1	1	3	24.9135	3	3	1	3	1	1	1	1	1	2	4	1	1	1	1	1	1	1
882	3	0	1	1	1	1	2	26	2	1	3	3	22.2656	2	3	3	4	2	1	1	1	1	2	1	1	2	1	1	1	1	1
883	3	0	1	1	1	1	1	29	2	1	2	2	18.3143	1	3	3	1	2	2	2	1	1	1	1	1	3	1	1	1	1	1
884	1	0	1	1	1	1	1	13	1	1	1	2	16.7969	1	3	2	4	2	2	1	1	1	2	4	1	4	1	1	1	2	1
885	3	0	1	1	1	1	1	23	1	1	2	2	26.0375	3	2	3	3	2	1	1	1	1	1	1	1	2	1	1	1	1	1
886	1	0	1	1	1	1	1	33	2	1	4	3	22.0386	2	2	2	1	1	1	2	1	1	1	1	1	4	1	1	1	4	1
887	2	0	1	1	1	1	1	16	1	1	4	4	20.4294	2	1	1	1	1	2	1	1	1	2	4	1	1	1	1	1	3	1
888	2	0	1	1	1	1	1	27	2	1	3	3	17.3134	1	4	3	1	2	2	2	2	1	2	4	1	4	1	1	1	2	1
889	3	0	1	1	1	1	1	34	2	1	4	3	25.1607	3	2	2	3	1	1	1	1	1	2	1	1	2	1	1	1	3	1
890	3	0	1	1	1	1	1	23	1	1	2	2	23.6244	2	3	3	3	2	2	1	1	1	1	4	1	3	1	1	1	1	1
891	3	0	1	1	1	1	1	26	2	1	3	3	21.573	2	3	3	3	2	2	1	1	1	1	1		2	1	1	1	1	1
892	1	0	1	1	1	1	1	34	2	1	2	2	20.8117	2	3	3	2	2	1	2	2	1	1	4	1	3	1	1	1	1	1
893	2	0	1	1	1	1	1	24	1	1	3	3	19.9481	2	2	2	4	2	1	1	1	1	1	4	1	1	1	1	1	1	1
894	3	0	1	1	1	1	1	28	2	2	2	2	21.0962	2	4	4	2	1	1	1	1	1	1	4	1	4	1	1	1	2	1
895	2	0	1	1	1	1	1	19	1	1	4	4	16.9747	1	3	3	1	1	2	2	1	1	2	4	1	2	1	1	1	3	1
896	2	0	1	1	1	1	1	34	2	1	3	3	22.0317	2	2	3	4	1	1	1	1	1	2	4	1	3	1	1	1	1	1
897	3	0	1	1	1	1	1	26	2	1	2	4	20.3125	2	3	3	4	2	1	2	1	1	1	2	1	3	1	1	1	1	1
898	3	0	1	1	1	1	1	21	1	1	2	3	27.2392	3	3	3	1	1	2	1	1	1	1	4	1	3	1	1	1	1	1
899	3	0	1	1	1	1	1	19	1	1	4	4	18.75	2	3	3	1	1	2	2	1	1	1	4	1	2	1	1	1	3	1
900	3	0	2	1	1	1	1	31	2	1	2	2	27.0552	3	4	3	3	2	1	2	1	1	1	2	1	4	1	1	1	2	1
901	1	0	1	1	1	1	1	31	2	1	2	2	24.4444	3	3	3	4	1	1	1	1	1	1	4	1	3	1	1	1	1	1
902	2	0	1	1	1	1	1	23	1	1	4	4	19.1406	2	2	2	1	1	2	1	1	1	1	4	1	2	1	1	1	3	1
903	3	0	1	1	1	1	1	26	2	1	4	4	20.7008	2	3	2	1	2	2	1	1	1	1	1		2	1	1	1	3	1
904	3	0	1	1	1	1	1	30	2	1	3	3	29.3724	3	3	2	2	1	1	1	1	1	1	4	1	4	1	1	1	2	1
905	3	1	2	1	2	1	1	27	2	1	2	3	18.3143	1	4	4	2	1	1	1	1	1	2	4	1	4	1	1	1	2	1
906	3	0	1	1	1	1	1	27	2	1	2	2	23.1111	2	3	3	3	2	2	1	1	1	1	1		2	1	1	1	1	1
907	2	0	1	1	1	1	1	23	1	1	3	3	20.8117	2	3	3	4	2	2	2	1	1	2	4	1	3	1	2	1	1	1
908	3	0	1	1	1	1	2	41	3	1	3	3	26.2222	3	3	3	3	1	1	1	1	1	1	4	1	4	1	1	1	2	1
909	2	0	1	1	1	1	1	29	2	1	4	4	23.9224	2	4	3	4	1	1	1	1	1	1	4	1	3	1	1	1	3	1
910	1	0	1	1	1	1	1	26	2	1	3	3	22.8928	2	3	3	1	1	2	2	1	1	1	4	1	3	1	1	1	1	1
911	1	0	1	1	1	1	1	19	1	1	1	3	20.9321	2	2	2	3	2	1	1	1	1	2	4	1	1	1	1	1	1	1
912	3	0	1	1	1	1	1	27	2	1	3	3	24.4646	3	2	3	2	2	1	1	1	1	1	1		2	1	1	1	1	1
913	2	0	1	1	1	1	1	35	3	2	4	4	19.1406	2	2	3	2	1	1	1	1	1	1	4	1	3	1	1	1	3	1
914	2	0	1	1	1	1	1	26	2	1	4	1	17.4449	1	1	2	4	1	2	1	1	1	2	4	1	2	1	1	1	3	1
915	3	0	1	1	1	1	1	30	2	1	2	2	25.9695	3	3	3	3	1	1	2	1	1	2	1	1	2	1	1	1	1	1
916	1	0	1	1	1	1	1	29	2	2	3	1	20.7756	2	3	3	2	2	1	1	1	1	1	4	1	2	1	1	1	1	1
917	3	0	1	1	1	1	1	18	1	1	2	2	22.571	2	3	4	3	2	2	1	1	1	1	1	1	2	1	1	1	1	1
918	1	0	1	1	1	1	1	27	2	2	3	3	22.8329	2	3	3	2	1	1	2	1	1	2	4	2	3	1	1	1	1	1
919	2	0	1	1	1	1	1	22	1	1	2	2	20.9566	2	3	3	4	1	1	1	1	1	2	4	1	3	1	1	1	1	1
920	2	0	1	1	1	1	1	11	1	1	4	2	27.7778	3	3	1	3	2	2	1	1	1	2	4	1	3	1	1	1	3	1
921	3	0	1	1	1	1	1	38	3	1	3	3	21.0938	2	2	3	1	1	2	1	1	1	1	4	1	4	1	1	1	2	1
922	2	0	1	1	1	1	1	32	2	1	2	2	21.5019	2	4	3	4	2	1	1	1	1	1	2	1	1	1	1	1	1	1
923	2	0	1	1	1	1	1	34	2	1	1	2	21.9261	2	4	3	3	1	1	1	1	1	1	4	1	1	1	1	1	1	1
924	3	0	1	1	1	1	2	37	3	1	3	4	21.3599	2	2	3	3	1	1	2	1	1	1	4	1	3	1	1	1	1	1
925	3	0	1	1	1	1	2	31	2	1	2	2	25.3906	3	3	3	4	1	1	1	1	1	2	1	1	2	1	1	1	1	1
926	2	0	1	1	1	1	1	19	1	1	4	2	19.2894	2	2	3	1	1	2	2	1	1	1	4	1	3	1	1	1	3	1
927	3	0	1	1	1	1	1	34	2	1	3	3	23.8281	2	3	3	3	1	1	1	1	1	1	4	1	4	1	1	1	2	1
928	1	0	1	1	1	1	1	13	1	1	1	2	21.3593	2	1	2	4	1	2	1	1	1	2	4	1	1	1	1	1	1	1
929	3	0	1	1	1	1	1	26	2	2	4	4	30.4438	3	3	4	1	2	2	1	1	1	1	1	1	2	1	2	1	3	1
930	1	0	1	1	1	1	1	27	2	1	3	2	20.9566	2	3	3	2	2	1	2	1	1	2	4	2	2	1	1	1	1	1
931	2	0	1	1	1	1	1	36	3	1	2	1	16.0231	1	4	3	4	1	1	1	1	1	2	1	1	3	1	1	1	1	1
932	1	0	1	1	1	1	1	29	2	1	2	2	20.3125	2	2	3	3	1	1	1	1	1	1	4	1	3	1	1	1	1	1
933	3	0	1	1	1	1	1	23	1	1	4	3	21.7784	2	3	3	1	2	2	1	1	1	1	2		2	1	1	1	3	1
934	3	0	2	1	1	1	1	32	2	1	2	2	18.902	2	4	4	1	1	2	1	1	1	1	4	1	3	1	1	1	1	1
935	3	0	1	1	1	1	1	15	1	2	4	4	22.5466	2	1	1	1	1	2	2	1	1	2	4	1	3	1	1	1	3	1
936	1	0	1	1	1	1	2	36	3	1	1	3	26.3702	3	3	2	4	1	1	1	1	1	2	4	1	3	1	1	2	1	1
937	3	0	1	1	1	1	1	25	1	1	3	3	20.6612	2	3	3	2	2	1	1	1	1	2	1	1	2	1	1	1	1	1
938	3	0	1	1	1	1	1	32	2	1	4	2	19.8347	2	2	3	4	2	1	1	1	1	1	4		4	1	1	1	4	1
939	2	0	1	1	1	2	1	18	1	1	4	4	18.902	2	3	1	2	1	1	2	1	1	2	4	1	3	1	1	1	3	1
940	3	0	1	1	1	1	1	27	2	1	4	4	18.6667	2	3	2	2	2	1	2	1	1	2	1	1	3	1	1	1	3	1
941	3	0	1	1	1	1	1	31	2	1	2	2	16.8364	1	3	3	3	1	1	1	1	1	2	1	1	2	1	1	1	1	1
942	3	0	1	1	1	1	1	18	1	1	2	2	27.9421	3	2	3	4	1	2	1	1	1	2	2	1	3	1	1	1	1	1
943	3	0	1	1	1	1	1	24	1	1	4	3	25.3444	3	1	2	1	2	2	1	1	1	1	1		3	1	1	1	3	1
944	3	0	1	1	1	1	1	21	1	2	2	2	20.0877	2	3	3	5	1	2	1	1	1	1	2	1	1	1	1	1	1	1
945	3	0	1	1	1	1	1	31	2	1	4	3	24.974	3	3	2	2	1	1	1	1	1	2	4	1	2	1	1	1	3	1
946	3	0	1	1	1	1	1	27	2	1	4	4	20.9572	2	2	2	3	1	1	1	1	1	1	1	1	2	1	1	1	3	1
947	3	0	1	1	1	1	1	31	2	1	3	3	17.5781	1	4	4	2	1	1	1	1	1	2	4	1	3	1	1	2	1	1
948	2	0	1	1	1	1	1	25	1	1	3	3	20.4294	2	3	3	4	1	1	1	1	1	2	4	1	1	1	1	1	1	1
949	1	0	1	1	1	1	1	33	2	1	2	4	24.4956	3	1	2	4	1	1	2	1	1	1	2	1	2	1	1	1	1	1
950	3	0	1	1	1	1	1	24	1	1	2	2	20.4294	2	4	4	3	1	1	1	1	1	2	4	1	3	1	1	1	1	1
951	1	0	1	1	1	1	1	24	1	1	3	3	24.0346	3	2	3	4	1	1	2	1	1	2	4	1	3	1	1	1	1	1
952	1	0	1	1	1	1	1	25	1	1	2	2	26.986	3	2	3	2	1	2	1	1	1	1	4	1	1	1	1	1	1	1
953	3	0	1	1	1	1	1	19	1	1	2	2	20.1951	2	2	3	1	2	2	1	1	1	1	2	1	3	1	1	1	1	1
954	1	0	1	1	1	1	2	32	2	1	2	2	23.4221	2	3	3	3	1	1	1	2	1	1	4	1	2	2	1	1	1	1
955	3	2	1	2	1	1	2	26	2	1	4	4	23.2434	2	3	2	1	2	2	1	1	1	1	1	1	2	2	1	1	3	1
956	2	0	1	1	1	1	1	25	1	1	4	3	20.8117	2	2	3	1	1	2	2	1	1	1	4	1	2	1	1	1	3	1
957	2	0	1	1	1	1	1	21	1	1	2	2	21.6441	2	2	3	2	1	1	1	1	1	1	1	1	3	1	1	1	1	1
958	3	0	1	1	1	1	1	15	1	1	3	3	26.6389	3	2	2	2	2	1	1	1	1	2	4	1	4	1	1	1	2	1
959	3	0	1	1	1	1	1	32	2	1	2	2	21.3333	2	2	3	2	1	1	1	1	1	1	1	1	2	1	1	1	1	1
960	2	0	1	1	1	1	1	41	3	1	1	1	22.0604	2	4	3	3	1	1	1	1	1	1	4	1	1	1	1	1	1	1
961	2	0	1	1	1	2	1	30	2	1	3	4	48.283	3	3	3	2	1	1	2	1	1	2	4	1	4	1	1	1	2	1
962	3	0	1	1	1	1	1	45	3	1	2	1	23.634	2	2	3	3	2	1	1	1	1	1	1	1	2	1	1	1	1	1
963	3	0	1	1	1	1	1	19	1	1	2	2	22.0317	2	4	3	2	1	1	1	1	1	1	4	1	3	1	1	1	1	1
964	3	0	1	1	1	1	1	31	2	1	1	2	23.4375	2	2	2	4	2	1	1	1	1	2	4	1	3	1	1	1	1	1
965	2	0	1	1	1	1	1	24	1	1	3	2	20.202	2	2	2	4	1	2	1	1	1	1	4	1	1	1	1	1	1	1
966	3	0	1	1	1	2	1	26	2	1	3	3	19.9481	2	4	4	1	2	2	1	1	1	1	4	1	3	1	1	1	1	1
967	3	0	1	1	1	1	1	27	2	1	2	2	20.83	2	2	3	2	2	1	1	1	1	1	3	1	3	1	1	1	1	1
968	1	0	1	1	1	1	2	15	1	1	4	2	23.2335	2	2	1	2	1	1	2	1	1	2	4	1	3	1	1	1	3	1
969	3	0	1	1	1	1	1	13	1	1	1	4	23.833	2	2	2	2	2	1	1	1	1	2	4	1	5	1	1	1	2	1
970	1	0	2	1	1	1	1	21	1	1	3	3	16.6493	1	2	3	2	1	1	1	1	1	1	4	1	2	1	1	1	1	1
971	3	0	2	1	1	1	1	25	1	1	2	2	21.7778	2	2	4	3	2	1	1	1	1	1	2	1	2	1	1	1	1	1
972	3	0	1	1	1	1	1	27	2	1	2	2	21.7778	2	4	4	2	1	1	1	1	1	1	4		3	1	1	1	1	1
973	3	0	1	1	1	1	1	21	1	1	4	4	22.0386	2	4	4	3	2	2	1	1	1	1	1		2	1	1	1	3	1
974	3	0	1	1	1	1	2	31	2	1	4	4	23.1247	2	1	1	1	1	2	2	1	1	1	4	1	3	1	1	1	3	1
975	3	0	2	1	1	1	1	32	2	1	4	4	23.6244	2	3	2	4	1	1	2	1	1	1	4	1	2	1	1	1	3	1
976	3	0	1	1	1	1	1	24	1	1	4	4	26.0375	3	2	3	4	1	2	2	1	1	1	1	1	3	1	1	1	3	1
977	3	0	1	1	1	1	1	24	1	1	2	2	24.8889	3	3	3	2	2	1	1	1	1	1	1	1	3	1	1	1	1	1
978	3	0	1	1	1	1	1	11	1	1	3	2	22.6003	2	2	2	4	2	2	1	1	1	1	4	1	3	1	1	1	1	1
979	1	0	1	1	1	1	1	24	1	1	2	3	17.7154	1	3	3	1	1	2	1	2	1	1	1	1	2	1	1	1	1	1
980	2	0	1	1	1	1	1	33	2	1	4	3	22.7444	2	3	2	3	1	1	2	1	1	1	4	1	3	1	1	1	3	1
981	3	0	1	1	1	1	1	30	2	1	1	2	35.5556	3	2	2	4	1	1	2	1	1	2	4	1	3	1	1	1	1	1
982	3	0	1	1	1	1	1	20	1	1	3	3	22.0741	2	3	3	2	2	2	2	1	1	1	4	1	4	1	1	1	2	1
983	3	0	1	1	1	1	1	34	2	1	4	4	21.6441	2	1	3	4	1	1	1	2	1	1	2		2	1	1	1	3	1
984	3	0	1	1	1	1	1	26	2	1	3	3	23.9224	2	3	4	2	2	1	1	1	1	1	1	1	2	1	1	2	1	1
985	3	0	2	1	1	1	1	30	2	1	3	4	17.6254	1	2	4	3	1	2	2	1	1	2	2	1	3	1	1	1	1	1
986	3	0	2	1	1	1	1	33	2	1	4	3	23.0112	2	2	4	3	2	1	1	1	1	1	1	2	2	1	1	1	3	1
987	1	0	1	1	1	1	1	26	2	1	2	2	26.7094	3	2	3	3	2	1	2	1	1	1	1	1	4	1	1	1	2	1
988	3	0	1	1	1	1	1	15	1	1	3	3	18.8271	2	4	2	3	2	1	1	1	1	2	4	1	3	1	1	1	1	1
989	1	0	2	1	1	1	1	32	2	1	2	2	23.0112	2	2	3	4	1	1	1	1	1	1	4	1	1	1	1	1	1	1
990	3	0	1	1	1	1	1	23	1	1	2	2	23.4375	2	2	3	1	2	2	1	1	1	1	1	1	2	1	1	1	1	1
991	1	0	1	1	1	1	1	32	2	1	2	4	24.6548	3	2	3	5	1	1	1	1	1	2	4	1	1	1	1	1	1	2
992	2	0	1	1	1	1	1	31	2	1	2	2	26.0584	3	3	2	1	1	2	2	1	1	1	2	1	5	1	1	1	2	1
993	2	0	1	1	1	2	1	29	2	1	2	2	20.6612	2	4	4	4	1	1	1	1	1	1	4	1	1	1	2	1	1	1
994	3	0	1	1	1	1	1	27	2	1	2	2	25.6055	3	1	3	1	2	2	1	1	1	1	1	1	2	1	1	1	1	1
995	3	0	1	1	1	1	1	27	2	1	3	3	21.4844	2	2	2	3	2	2	2	1	1	1	3		2	1	1	1	1	1
996	3	0	1	1	1	1	1	27	2	1	3	3	20.9572	2	2	3	2	2	1	1	1	1	1	4	1	4	1	1	1	2	1
997	1	0	1	1	1	1	1	32	2	1	2	3	19.2277	2	2	3	1	1	2	1	1	1	1	1	1	3	1	1	1	1	1
998	1	0	1	1	1	1	1	24	1	2	3	2	24.6548	3	3	3	1	1	2	2	1	1	1	4	2	3	1	1	1	1	1
999	3	0	1	1	1	1	1	42	3	1	2	2	23.4375	2	3	4	3	1	1	1	1	2	1	4	1	4	1	1	1	2	1
1000	2	0	1	1	1	1	1	40	3	2	2	4	22.8928	2	2	3	4	1	1	2	1	1	2	4	1	2	1	1	1	1	1
1001	1	0	1	1	1	1	1	29	2	1	3	3	20.4294	2	2	3	1	1	2	1	1	1	1	4	1	4	1	1	1	2	1
1002	3	0	1	1	1	1	2	30	2	1	3	3	22.8928	2	3	3	4	1	1	1	1	1	1	4	1	3	1	1	1	1	1
1003	3	0	1	1	1	1	1	46	3	1	2	2	20.0288	2	4	4	4	1	1	1	1	1	2	4	1	2	1	1	1	1	1
1004	3	0	1	1	1	1	1	30	2	1	4	4	19.9792	2	1	1	2	2	1	2	1	1	2	3	1	3	1	1	1	3	1
1005	1	0	1	1	1	1	1	31	2	2	4	2	19.1467	2	2	1	1	2	2		1	1	2	1	1	1	1	1	1	3	1
1006	3	0	1	1	1	1	1	28	2	1	2	2	18.3655	1	4	4	3	1	1	2	1	1	1	2		2	1	1	1	1	1
1007	2	0	1	1	1	1	2	31	2	1	4	4	17.5781	1	1	1	3	2	1	2	1	1	2	4	1	1	1	1	1	3	1
1008	3	0	1	1	1	1	1	18	1	1	3	3	28.1969	3	2	2	3	1	2	2	1	1	1	1		1	1	1	1	1	1
1009	3	0	1	1	1	2	1	17	1	1	4	4	24.093	3	1	1	2	2	1	2	1	1	2	3	1	4	1	1	1	4	1
1010	3	0	1	1	1	1	1	23	1	1	4	4	18.026	1	2	3	1	1	2	1	1	1	1	4	1	3	1	1	1	3	1
1011	3	0	1	1	1	1	1	31	2	1	4	3	20.5761	2	2	1	3	2	1	2	1	1	1	3	1	3	1	1	1	3	1
1012	1	0	2	1	1	1	1	27	2	2	3	2	22.8928	2	2	3	5	1	2	1	1	1	2	1	1	3	1	1	1	1	1
1013	1	0	1	1	1	1	1	27	2	1	4	4	27.4714	3	2	2	3	1	2	1	1	1	2	4	1	2	1	1	1	3	1
1014	3	0	1	1	1	1	1	32	2	1	2	2	19.607	2	2	2	4	1	2	1	1	1	1	4	1	3	1	1	1	1	1
1015	3	0	2	1	1	1	1	21	1	1	2	2	23.8751	2	4	4	1	1	2	1	1	1	2	4	1	4	1	1	1	2	1
1016	2	0	1	1	1	1	1	27	2	1	2	2	22.231	2	2	3	5	1	1	1	1	1	2	4	1	4	1	1	1	2	1
1017	3	0	1	1	1	1	1	30	2	1	2	3	23.7253	2	4	4	3	1	1	1	1	1	1	4	1	3	1	1	1	1	1
1018	3	0	1	1	1	1	2	26	2	1	2	2	25	3	2	3	3	2	1	1	1	1	1	1	1	2	1	1	1	1	1
1019	1	0	1	1	1	1	1	28	2	1	4	4	27.0552	3	1	2	3	1	2	2	1	1	1	4	1	3	1	1	1	3	1
1020	1	0	1	1	1	1	1	19	1	1	4	4	25.7778	3	3	1	5	2	1	2	1	1	1	4	1	5	1	1	1	4	1
1021	3	0	1	1	1	1	1	30	2	1	2	2	18.4911	1	4	4	2	1	1	1	1	1	2	4	1	3	1	1	1	1	1
1022	2	0	1	1	1	1	1	28	2	1	2	2	19.313	2	3	3	2	2	1	1	1	1	1	4	1	1	1	1	1	1	1
1023	3	0	1	1	1	1	1	31	2	1	3	3	23.3355	2	4	2	3	2	1	1	1	1	1	4	1	4	1	1	1	2	1
1024	3	0	1	1	1	1	1	20	1	1	2	3	17.0392	1	2	4	1	2	2	1	1	1	1	4	1	4	1	1	1	2	1
1025	3	0	1	1	1	1	1	33	2	1	2	2	26.7094	3	3	2	2	2	1	1	1	1	2	1	1	2	1	1	1	1	1
1026	3	0	1	1	1	1	1	21	1	1	2	2	25	3	3	3	4	1	1	1	1	1	1	1	1	2	1	1	1	1	1
1027	3	2	1	2	1	1	2	41	3	1	1	3	22.8329	2	2	3	3	1	1	2	1	1	2	4	2	3	1	1	1	1	1
1028	1	0	1	1	1	1	1	25	1	1	4	4	20.1348	2	3	3	3	1	1	1	1	1	1	4	1	1	1	1	1	3	1
1029	3	2	1	2	1	2	1	41	3	1	3	3	29.5858	3	2	4	2	2	1	1	1	1	1	4	1	3	1	2	1	1	1
1030	3	0	1	1	1	1	1	25	1	1	2	2	23.2335	2	3	3	3	2	2	1	1	1	1	4	1	3	1	1	1	1	1
1031	1	0	1	1	1	1	1	36	3	1	2	2	26.3672	3	3	3	2	2	1	1	1	1	2	4	1	1	1	1	1	1	1
1032	3	0	1	1	1	1	1	28	2	1	2	2	18.8271	2	3	3	2	2	2	1	1	1	1	4	1	3	1	1	1	1	1
1033	3	0	1	1	1	1	2	25	1	1	2	3	25.4767	3	2	3	2	2	1	1	1	1	1	1	1	2	1	1	1	1	2
1034	3	0	2	1	1	1	1	35	3	1	1	1	20.8117	2	3	3	3	1	1	1	1	1	1	4	1	3	1	1	1	1	1
1035	3	0	1	1	1	1	1	22	1	1	3	3	20.8889	2	2	3	2	2	1	1	1	1	1	1	1	2	1	1	1	1	1
1036	1	0	1	1	1	1	1	18	1	1	4	4	21.6311	2	1	1	5	2	2	2	1	1	2	4	1	3	1	1	1	3	1
1037	3	0	2	1	1	1	1	28	2	1	2	3	19.1111	2	4	4	1	1	1	1	1	1	2	4	1	3	1	1	1	1	1
1038	3	0	2	1	1	1	1	23	1	1	2	2	21.3675	2	4	4	1	1	2	1	1	1	1	4	1	4	1	1	1	2	1
1039	2	0	1	1	1	1	1	35	3	1	2	2	20.8117	2	2	3	2	2	1	1	1	1	1	4	1	2	1	1	1	1	1
1040	3	0	1	1	1	1	1	30	2	1	3	3	18.6709	2	2	4	1	2	2	1	1	1	1	4	1	4	1	1	1	2	1
1041	3	0	1	1	1	1	1	24	1	1	2	3	22.0604	2	2	3	1	2	2	2	1	1	1	2		2	1	1	1	1	1
1042	3	0	1	1	1	1	1	23	1	1	2	4	22.0386	2	2	3	4	1	2	1	1	1	1	3	1	3	1	1	1	1	1
1043	3	0	1	1	1	1	1	32	2	1	3	3	22.3478	2	1	4	3	2	1	1	1	1	2	4	1	3	1	1	1	1	1
1044	3	0	1	1	1	1	1	14	1	1	1	2	26.3702	3	2	2	2	2	1	1	1	1	1	4	2	4	1	1	1	2	1
1045	3	0	1	1	1	1	1	24	1	1	2	2	17.2248	1	4	4	2	2	1	1	1	1	1	2	1	2	1	1	1	1	1
1046	3	0	1	1	1	1	1	28	2	1	2	2	18.3655	1	4	4	2	2	2	2	1	1	1	4	1	2	1	1	1	1	1
1047	1	0	1	1	1	1	1	35	3	1	3	3	23.0332	2	2	3	1	1	2	2	1	1	1	4	1	4	1	1	1	2	1
1048	3	0	1	1	1	1	1	28	2	1	3	3	23.3056	2	3	3	4	2	1	1	1	1	1	1	1	2	1	1	1	1	1
1049	3	0	1	1	1	1	1	31	2	1	3	3	25.9107	3	1	3	1	2	2	1	1	1	1	4		4	1	2	2	2	1
1050	3	0	1	1	1	2	2	31	2	1	2	2	23.1911	2	3	3	3	2	1	1	1	1	1	4	1	2	1	1	1	1	1
1051	3	0	1	1	1	1	1	21	1	1	2	2	22.4323	2	4	4	2	1	1	1	1	1	2	4	1	3	1	1	1	1	1
1052	3	0	1	1	1	1	1	26	2	1	4	1	19.1467	2	3	2	2	1	2	2	1	1	1	1	1	2	1	1	1	3	1
1053	1	0	1	1	1	1	1	21	1	1	3	2	17.6254	1	3	3	1	1	2	1	1	1	1	4	1	3	1	1	1	1	1
1054	1	0	1	1	1	1	1	16	1	1	1	2	21.0962	2	3	2	1	1	1	1	1	1	1	1	1	3	1	1	1	1	1
1055	3	0	1	1	1	1	1	36	3	1	4	4	24.2188	3	3	2	2	2	1	2	1	1	2	1	2	3	1	1	1	3	1
1056	3	0	1	1	1	1	1	10	1	1	3	4	25.1532	3	2	2	1	2	2	1	1	1	1	4		3	1	1	1	1	1
1057	3	0	1	1	1	1	1	29	2	1	4	3	25.7117	3	2	2	4	1	1	1	1	1	1	4		2	1	1	1	3	1
1058	2	2	1	2	1	1	1	17	1	1	2	3	25.3906	3	2	3	5	1	2	1	1	1	1	1	1	4	1	1	1	2	1
1059	1	0	1	1	1	1	1	28	2	1	2	2	23.4375	2	4	3	3	1	1	1	1	1	1	1	1	3	1	1	1	1	1
1060	3	0	1	1	1	1	1	35	3	1	2	2	20.8117	2	3	3	2	1	1	1	1	1	1	3	1	2	1	1	1	1	1
1061	3	0	1	1	1	1	2	29	2	1	3	3	25.5296	3	4	4	2	2	1	1	1	1	2	4		3	1	1	1	1	1
1062	3	0	1	1	1	1	1	28	2	1	4	4	28.3987	3	2	2	1	2	2	2	1	1	2	4	1	5	1	1	1	4	1
1063	3	0	1	1	1	1	1	25	1	1	3	3	25.5661	3	3	3	4	2	2	2	1	1	1	4	1	3	1	1	1	1	1
1064	3	0	1	1	1	1	1	35	3	1	1	2	25.7778	3	2	2	3	2	1	1	1	1	2	1	1	3	1	1	1	1	1
1065	3	0	1	1	1	1	1	25	1	1	2	3	18.3594	1	4	4	3	1	1	1	1	1	2	4	1	3	1	1	1	1	1
1066	3	0	1	1	1	1	2	34	2	2	1	2	28.3039	3	2	2	2	2	1	1	1	1	2	3	1	1	1	1	1	1	1
1067	3	0	1	1	1	1	1	27	2	1	2	3	25	3	4	4	5	2	1	1	1	1	2	4		4	1	1	1	2	1
1068	1	0	1	1	1	1	1	28	2	1	2	2	20.3244	2	3	3	3	1	1	1	1	1	1	1	1	3	1	1	1	1	1
1069	3	0	1	1	1	1	1	31	2	1	4	4	22.0386	2	2	2	3	2	1	1	1	1	2	4	1	4	1	1	1	4	1
1070	3	0	1	1	1	1	1	32	2	1	3	4	23.0112	2	1	2	2	2	1	1	1	1	1	4	1	4	1	1	1	2	1
1071	3	0	1	1	1	1	1	40	3	1	3	3	21.0772	2	3	3	2	1	1	1	1	1	1	4	1	4	1	1	1	2	1
1072	1	0	1	1	1	1	1	30	2	1	2	2	24.0346	3	3	3	5	1	1	1	1	1	1	4	2	3	1	1	1	1	1
1073	3	0	1	1	1	1	1	27	2	1	2	2	23.5304	2	3	3	2	2	2	1	1	1	1	3		2	1	1	1	1	1
1074	3	0	1	1	1	1	2	23	1	1	2	3	23.8281	2	3	3	4	1	1	2	1	1	1	3	1	3	1	1	1	1	1
1075	3	0	1	1	1	1	1	27	2	1	4	4	22.6562	2	3	3	2	1	1	1	1	1	1	4	1	4	1	1	1	4	1
1076	3	1	1	1	2	1	1	28	2	1	2	2	24.3259	3	4	4	4	2	2	1	1	1	1	4	1	3	1	1	1	1	1
1077	2	0	1	1	1	1	1	24	1	1	4	3	19.736	2	2	3	1	2	2	2	1	1	1	4	1	4	1	1	1	4	1
1078	1	0	1	1	1	1	1	17	1	1	4	4	18.026	1	2	1	4	2	2	1	1	1	1	4	1	3	1	1	1	3	1
1079	3	0	1	1	1	1	1	41	3	1	2	2	23.4375	2	3	3	4	2	1	2	1	1	1	2		3	1	1	1	1	1
1080	1	0	1	1	1	1	1	15	1	1	1	3	23.8054	2	2	2	4	1	1	1	1	1	2	4	1	3	1	1	1	1	1
1081	1	0	1	1	1	2	2	25	1	1	4	4	18.75	2	1	2	2	1	2	2	1	1	1	1	2	3	1	1	1	3	1
1082	3	0	1	1	1	1	1	24	1	1	4	3	18.591	2	2	4	1	2	2	1	1	1	1	4	1	4	1	1	1	4	1
1083	2	0	1	1	1	1	1	27	2	1	4	3	28.2284	3	3	2	2	2	1	2	1	1	1	4	1	1	1	1	1	3	1
1084	3	0	1	1	1	1	1	26	2	1	4	4	20.3125	2	3	2	4	1	2	2	1	1	1	4	1	3	1	1	1	3	1
1085	2	0	1	1	1	1	1	30	2	1	4	4	20.8889	2	1	1	2	1	1	2	1	1	2	4	1	1	1	1	1	3	1
1086	3	0	1	1	1	1	1	21	1	1	3	3	17.3604	1	2	3	5	2	2	2	1	1	1	2	1	2	1	1	1	1	1
1087	3	0	1	1	1	1	1	26	2	1	2	2	21.2279	2	3	3	1	2	2	2	1	1	1	1	1	4	1	1	1	2	1
1088	2	0	1	1	1	1	1	22	1	1	2	2	21.6441	2	2	3	3	1	1	1	1	1	1	1	1	4	1	1	1	2	1
1089	3	0	1	1	1	1	1	31	2	1	1	3	15.625	1	3	2	3	2	1	1	1	1	1	4	1	4	1	1	1	2	1
1090	3	0	1	1	1	1	1	16	1	1	4	4	19.8413	2	1	1	1	2	2	2	1	1	2	1		3	1	1	1	3	1
1091	3	0	1	1	1	1	2	23	1	1	2	2	22.0711	2	3	3	3	2	1	2	1	1	1	4		3	1	1	1	1	1
1092	1	0	1	1	1	1	1	29	2	1	2	2	27.3438	3	3	3	1	1	1	2	1	1	1	1	1	3	1	1	1	1	1
1093	3	0	1	1	1	1	1	19	1	1	4	4	16.0231	1	1	1	1	2	2	2	1	1	2	4		3	1	1	1	3	1
1094	3	1	2	1	2	1	1	26	2	1	2	2	21.6413	2	2	3	3	2	1	1	1	1	1	2	1	2	1	1	1	1	1
1095	3	0	1	1	1	1	1	32	2	1	2	3	27.8159	3	3	3	3	1	1	1	1	1	1	4	1	2	1	1	1	1	1
1096	3	0	1	1	1	1	1	28	2	1	3	3	20.5693	2	2	2	4	1	2	1	1	1	2	1	1	2	1	1	1	1	1
1097	3	0	1	1	1	2	2	27	2	1	2	2	20.0288	2	3	3	3	2	1	1	1	1	1	4	1	3	1	1	1	1	1
1098	3	0	1	1	1	1	1	22	1	1	3	3	24.974	3	3	2	4	1	1	1	1	1	1	4	1	3	1	1	1	1	1
1099	3	0	1	1	1	1	1	28	2	1	2	3	23.8751	2	3	3	2	2	1	2	1	1	1	2	1	3	1	1	1	1	1
1100	3	0	1	1	1	1	1	35	3	1	3	2	20.9644	2	4	4	2	1	1	1	1	1	1	4	1	3	1	1	1	1	1
1101	3	0	1	1	1	1	1	27	2	1	4	4	27.9421	3	2	2	2	2	1	2	1	1	1	4	1	5	1	1	1	4	1
1102	1	0	1	1	1	1	1	24	1	1	3	4	20.7666	2	3	3	3	2	2	1	1	1	2	1	1	4	1	1	1	2	1
1103	3	0	1	1	1	1	1	16	1	1	2	2	21.6041	2	4	4	1	1	2	1	1	1	1	4		3	1	1	1	1	1
1104	1	0	2	1	1	1	1	26	2	1	2	3	21.5019	2	3	3	1	1	2	2	1	1	1	4	1	2	1	1	1	1	1
1105	3	0	1	1	1	1	1	24	1	1	4	4	16.2331	1	3	3	3	2	2	2	1	1	1	1	1	3	1	1	1	3	1
1106	3	0	1	1	1	1	1	24	1	1	2	2	17.5781	1	3	3	3	2	2	1	1	1	1	1		1	1	1	1	1	1
1107	1	0	1	1	1	1	1	28	2	1	2	2	20.9566	2	3	3	3	2	2	1	1	1	1	4	1	2	1	1	1	1	1
1108	3	0	1	1	1	1	1	25	1	1	2	2	24.6548	3	4	3	1	2	2	1	1	1	1	3		2	1	1	1	1	1
1109	1	0	1	1	1	1	1	23	1	1	3	3	18.3143	1	3	3	2	1	1	2	1	1	1	4	1	2	1	1	1	1	1
1110	3	0	1	1	1	1	1	32	2	1	2	2	20.4444	2	2	4	2	2	1	1	1	1	1	2	1	2	1	1	1	1	1
1111	3	0	1	1	1	1	1	16	1	1	1	3	25.4767	3	2	2	2	2	1	1	1	1	2	4	1	4	1	1	1	2	1
1112	3	0	1	1	1	1	1	26	2	1	2	2	24.0882	3	2	3	3	1	1	1	1	1	1	3		2	1	1	1	1	1
1113	2	0	1	1	1	1	1	27	2	1	4	4	17.1875	1	1	2	1	2	2	2	1	1	1	4	1	3	1	1	1	3	1
1114	2	0	1	1	1	1	1	28	2	1	3	3	23.7253	2	3	3	2	1	1	2	1	1	1	4	1	3	1	1	1	1	1
1115	2	0	1	1	1	1	1	30	2	1	4	2	22.0317	2	3	2	2	2	2	2	1	1	1	4	1	3	1	1	1	3	1
1116	3	0	1	1	1	1	2	19	1	1	4	4	19.8347	2	1	1	3	1	1	1	1	1	2	4	1	3	1	1	1	3	1
1117	1	0	1	1	1	1	1	28	2	1	4	4	21.0962	2	3	3	2	1	1	2	1	1	1	4	1	4	1	1	1	4	1
1118	3	0	1	1	1	1	1	17	1	1	2	2	20.5688	2	4	4	2	1	1	1	1	1	1	4	1	3	1	1	1	1	1
1119	1	0	1	1	1	1	1	16	1	1	4	4	21.2874	2	2	1	3	2	1	1	1	1	2	4	1	1	1	1	1	3	1
1120	3	0	1	1	1	1	1	31	2	1	3	2	20.3125	2	3	3	2	1	2	1	1	1	1	2	1	2	1	1	1	1	1
1121	2	0	1	1	1	1	2	24	1	1	2	3	19.1111	2	3	2	1	1	2	2	1	1	1	1	2	4	1	1	1	2	1
1122	3	0	1	1	1	1	1	26	2	1	2	3	27.3438	3	4	4	2	1	1	1	1	1	1	4	2	4	1	1	1	2	1
1123	1	0	1	1	1	1	1	30	2	1	2	2	25.3906	3	3	3	5	1	1	1	1	1	1	1	1	3	1	1	1	1	1
1124	3	0	1	1	1	1	1	15	1	1	3	3	19.6283	2	2	2	4	2	1	1	1	1	2	4	1	1	1	1	1	1	1
1125	3	0	1	1	1	1	1	26	2	1	2	3	20.5761	2	4	4	3	1	1	1	1	1	2	4	1	3	1	1	1	1	1
1126	3	0	1	1	1	1	1	24	1	1	4	4	22.6562	2	1	3	1	2	2	2	1	1	1	3	1	4	1	1	1	4	1
1127	3	0	1	1	1	1	1	27	2	1	2	2	19.052	2	4	4	3	1	1	1	1	1	1	4	1	2	1	1	1	1	1
1128	3	0	1	1	1	1	2	26	2	1	2	2	19.9792	2	3	3	4	1	1	1	1	1	1	4	1	3	1	1	1	1	1
1129	1	0	1	1	1	1	1	27	2	1	2	2	23.1405	2	2	3	4	1	1	1	1	1	1	4	1	3	1	1	1	1	1
1130	3	0	1	1	1	1	1	22	1	1	3	3	19.3337	2	4	4	1	1	2	1	1	1	1	4		4	1	1	1	2	1
1131	3	0	1	1	1	1	1	34	2	1	3	3	22.3757	2	3	3	4	1	1	1	1	1	1	4	1	4	1	1	1	2	1
1132	2	0	1	1	1	1	1	23	1	1	3	3	16.4062	1	2	2	1	1	2	2	1	1	1	4	1	2	1	1	1	1	1
1133	3	0	1	1	1	2	1	31	2	1	4	4	19.3337	2	2	1	2	2	1	1	1	1	1	4	1	4	1	1	1	4	1
1134	1	0	1	1	1	1	1	24	1	1	2	2	19.3625	2	3	2	4	1	1	1	1	1	1	2	1	3	1	1	1	1	1
1135	3	0	1	1	1	1	2	25	1	1	3	3	22.1003	2	4	4	1	2	2	1	1	1	1	4		4	2	1	1	2	1
1136	3	0	1	1	1	1	1	15	1	1	3	3	19.1406	2	2	2	3	1	1	2	1	1	2	4	1	1	1	1	1	1	1
1137	1	0	1	1	1	1	1	18	1	1	3	3	16.0231	1	2	3	4	1	2	1	1	1	1	4	1	3	1	1	1	1	1
1138	3	0	1	1	1	1	1	29	2	1	3	3	23.8751	2	2	2	2	2	1	1	1	1	1	1	1	2	1	1	1	1	1
1139	1	0	1	1	1	1	1	18	1	1	4	4	18.4265	1	2	1	1	1	2	2	1	1	1	4	1	3	1	1	2	3	1
1140	1	0	1	1	1	1	1	26	2	1	3	3	21.0938	2	2	2	2	1	1	1	1	1	2	4	1	3	1	1	1	1	1
1141	2	0	1	1	1	1	1	29	2	1	2	2	20.4444	2	3	3	5	1	2	2	1	1	1	4	1	4	1	1	1	2	1
1142	3	0	1	1	1	1	1	11	1	1	3	3	28.251	3	4	1	4	2	2	1	1	1	2	4	1	3	1	1	1	1	1
1143	3	0	1	1	1	2	1	15	1	1	3	4	27.0538	3	1	2	1	2	2	2	1	1	2	4		4	1	1	1	2	1
1144	2	0	1	1	1	1	1	34	2	1	2	2	21.3039	2	3	3	5	1	2	1	1	1	1	1	1	4	1	1	1	2	1
1145	2	0	1	1	1	1	1	27	2	1	3	3	19.2234	2	2	3	3	1	1	1	1	1	1	4	1	2	1	1	1	1	1
1146	3	0	2	1	1	1	1	29	2	1	3	3	18.2899	1	2	2	3	1	1	2	1	1	1	4	1	2	1	1	1	1	1
1147	3	0	2	1	1	1	2	27	2	1	3	3	21.4844	2	4	4	1	1	2	1	1	1	2	4	1	4	1	1	1	2	1
1148	3	2	1	2	1	1	1	20	1	2	2	2	23.3377	2	3	3	4	2	2	1	1	1	1	4	1	3	1	1	1	1	1
1149	1	0	1	1	1	1	1	18	1	1	4	3	26.0375	3	2	1	1	1	2	2	1	1	1	1	1	3	1	1	2	3	1
1150	3	0	1	1	1	1	1	18	1	1	3	2	20.061	2	4	2	3	2	1	1	1	1	2	4	1	4	1	1	1	2	1
1151	1	0	1	1	1	1	1	28	2	1	3	2	20.5049	2	2	3	2	1	1	2	1	1	1	4	1	2	1	1	1	1	1
1152	3	0	1	1	1	1	1	40	3	1	2	2	21.3675	2	4	4	2	2	1	1	1	1	2	1	1	2	1	1	1	1	1
1153	3	0	1	1	1	1	1	31	2	1	2	2	30.1103	3	4	4	2	1	1	1	1	1	2	4	1	3	1	1	1	1	1
1154	1	2	1	2	1	1	1	30	2	1	2	3	20.7031	2	2	3	5	1	1	1	1	1	1	4	1	1	1	1	1	1	1
1155	2	0	1	1	1	1	1	35	3	1	1	2	22.3081	2	2	3	1	2	1	1	1	1	2	4	1	2	1	1	1	1	1
1156	3	0	1	1	1	1	1	35	3	1	1	1	19.6936	2	3	3	4	2	1	1	1	1	1	1	1	2	1	1	1	1	1
1157	3	0	1	1	1	1	1	27	2	1	4	4	26.2917	3	3	2	2	2	1	1	1	1	1	4	1	4	1	1	1	4	1
1158	3	0	1	1	1	1	1	23	1	1	2	3	26.8136	3	4	4	2	1	1	1	1	1	1	4	1	3	1	1	1	1	1
1159	1	0	1	1	1	1	1	17	1	1	4	4	23.0681	2	1	1	1	1	2	1	1	1	2	1	1	3	1	1	1	3	1
1160	1	0	1	1	1	1	2	31	2	1	2	2	24.974	3	4	3	2	1	1	2	1	1	1	4	1	2	1	1	1	1	1
1161	3	0	2	1	1	1	2	39	3	1	2	2	19.5312	2	2	2	3	1	1	2	1	1	1	4	1	2	1	1	1	1	1
1162	3	0	1	1	1	1	1	40	3	1	1	2	21.0828	2	3	4	5	1	1	1	1	1	1	1	1	3	1	1	1	1	1
1163	2	0	1	1	1	1	1	31	2	1	2	3	21.7555	2	4	3	2	1	1	1	1	1	1	4	1	1	1	1	1	1	1
1164	2	0	1	1	1	1	1	14	1	1	1	2	19.8141	2	3	2	1	1	2	2	1	1	2	4	1	1	1	1	1	1	1
1165	3	0	1	1	1	2	1	34	2	1	4	4	22.7615	2	1	1	3	1	1	1	1	1	2	4	1	4	1	1	1	4	1
1166	3	0	1	1	1	1	1	30	2	1	2	2	19.3359	2	3	3	4	1	1	1	1	1	1	4	1	3	1	1	1	1	1
1167	3	0	1	1	1	1	1	17	1	1	4	4	21.5019	2	1	1	3	2	2	2	1	1	2	4	1	3	1	1	1	3	1
1168	3	0	1	1	1	1	1	19	1	1	2	3	19.5312	2	3	3	4	2	1	2	1	1	1	3	1	2	1	1	1	1	1
1169	2	0	1	1	1	1	2	28	2	1	3	3	21.6041	2	3	3	3	1	1	1	1	1	1	4	1	1	1	1	1	1	1
1170	3	0	1	1	1	1	1	33	2	1	4	4	20.1951	2	1	2	2	2	1	1	1	1	1	1	1	3	1	1	1	3	1
1171	1	0	1	1	1	1	1	20	1	1	2	2	22.0386	2	2	3	5	1	1	1	1	1	1	3	1	3	1	1	1	1	1
1172	3	0	1	1	1	2	1	22	1	1	2	2	22.3674	2	2	3	1	2	2	1	1	1	1	1		2	1	2	1	1	1
1173	3	0	1	1	1	1	1	34	2	2	2	2	24.2222	3	4	4	3	2	1	1	1	1	2	1	1	2	1	1	1	1	1
1174	3	0	1	1	1	1	1	32	2	1	2	3	21.6311	2	3	4	1	1	2	1	1	1	1	4	1	4	1	1	1	2	1
1175	3	0	1	1	1	1	1	10	1	1	1	4	19.0677	2	3	2	1	2	2	1	1	1	1	4		4	1	1	1	2	1
1176	3	0	1	1	1	1	1	27	2	2	3	2	26.1719	3	3	3	3	2	2	2	1	1	1	3	1	3	1	1	1	1	1
1177	3	0	1	1	1	1	1	26	2	1	3	3	24.4444	3	3	3	5	1	1	2	1	1	1	4	1	2	1	1	1	1	1
1178	3	0	1	1	1	1	1	22	1	1	2	2	19.6283	2	4	4	2	1	1	1	1	1	1	2		3	1	1	1	1	1
1179	3	2	1	2	1	1	1	29	2	1	2	3	21.7193	2	3	4	1	2	2	1	1	1	1	4		4	1	1	1	2	1
1180	3	0	1	1	1	1	1	14	1	1	1	3	23.0112	2	4	2	1	2	2	1	1	1	2	4	1	4	1	1	1	2	1
1181	3	0	1	1	1	1	1	33	2	1	4	4	18.2899	1	2	2	2	1	1	2	1	1	1	1	1	4	1	1	1	4	1
1182	3	0	1	1	1	1	1	24	1	1	3	3	20.3125	2	2	3	3	2	1	2	1	1	2	4	1	4	1	1	1	2	1
1183	3	0	1	1	1	1	1	23	1	1	2	2	21.4536	2	3	3	1	2	2	1	1	1	1	4	1	2	1	1	1	1	1
1184	3	2	1	2	1	2	1	23	1	1	3	3	17.9089	1	4	4	2	2	1	1	1	1	1	4	1	4	1	1	1	2	1
1185	1	0	1	1	1	1	2	15	1	1	1	2	17.9931	1	2	2	3	1	2	2	1	1	1	1	1	3	1	1	1	1	1
1186	1	0	1	1	1	1	2	31	2	1	2	2	21.2279	2	4	4	3	1	1	2	1	1	1	1	1	3	1	1	1	1	1
1187	2	0	1	1	1	1	1	33	2	1	2	2	20.3125	2	2	3	1	2	1	1	1	1	1	1	1	3	1	1	1	1	1
1188	3	0	1	1	1	1	1	34	2	1	2	2	28.4444	3	4	3	2	2	1	1	1	1	1	1		1	1	1	1	1	1
1189	3	0	1	1	1	1	1	29	2	1	3	3	22.0604	2	2	2	2	2	1	2	1	1	1	4	1	2	1	1	1	1	1
1190	3	0	1	1	1	1	1	40	3	1	3	3	23.7118	2	4	4	4	2	1	1	1	1	1	4	1	4	2	2	1	2	2
1191	2	0	1	1	1	1	1	30	2	1	2	2	24.974	3	2	3	4	2	1	1	1	1	1	4	1	1	1	1	1	1	1
1192	3	0	1	1	1	1	1	28	2	1	2	2	20.0288	2	4	4	3	1	1	1	1	1	2	4	1	3	1	1	1	1	1
1193	3	0	1	1	1	1	1	33	2	1	3	2	30.2978	3	2	3	3	2	1	1	1	1	1	4		3	1	1	1	1	1
1194	3	0	2	1	1	1	2	26	2	1	4	4	19.6311	2	3	2	3	2	2			1	1		1	2	1	1	1	3	1
1195	3	2	2	2	1	1	2	23	1	1	2	2	21.7193	2	4	4	4	1	1	1	1	1	2	4	1	3	1	1	1	1	1
1196	2	0	1	1	1	1	1	19	1	1	2	2	23.6244	2	3	3	1	1	2	1	1	1	1	4	1	1	1	1	1	1	1
1197	2	0	1	1	1	1	1	10	1	1	3	4	20.202	2	2	1	5	2	2	2	1	1	2	4	1	3	1	1	1	1	1
1198	1	0	1	1	1	1	1	20	1	1	2	4	20.0692	2	1	3	1	1	2	2	1	1	1	2	1	4	1	1	1	2	1
1199	1	0	1	1	1	1	1	34	2	1	3	3	20.5457	2	2	3	2	2	1	1	1	1	1	4	1	1	1	1	1	1	1
1200	1	0	1	1	1	1	1	31	2	1	1	2	27.5556	3	2	2	4	1	1	1	1	1	2	1	1	3	1	1	1	1	1
1201	3	0	1	1	1	1	1	28	2	1	2	2	21.0938	2	4	4	2	2	1	1	1	1	1	2	1	2	1	1	1	1	1
1202	2	0	1	1	1	1	2	29	2	1	3	2	23.8054	2	2	3	4	1	1	1	1	1	2	4	1	3	1	1	1	1	1
1203	1	0	1	1	1	1	1	23	1	1	4	4	27.0552	3	3	3	2	1	1	2	1	1	1	4	1	2	1	1	1	3	1
1204	1	1	2	1	2	1	2	31	2	1	2	2	23.7253	2	2	3	2	1	1	1	1	1	2	1	1	3	1	1	1	1	1
1205	3	1	2	1	2	1	1	20	1	1	2	2	19.563	2	2	3	3	1	2	2	1	1	2	2	1	2	1	1	1	1	1
1206	3	0	1	1	1	1	1	23	1	1	4	4	20.3954	2	2	2	2	2	2	2	1	1	1	3	1	3	1	1	1	3	1
1207	3	0	2	1	1	1	2	28	2	1	2	2	20.3125	2	3	3	5	1	1	2	1	1	2	3	1	2	1	1	1	1	1
1208	3	0	1	1	1	1	2	30	2	1	2	2	20.3954	2	4	4	2	1	1	1	2	1	1	4		4	1	1	1	2	1
1209	3	0	1	1	1	1	1	27	2	2	4	4	25.4767	3	1	3	1	1	2	1	1	1	1	4		4	1	1	1	4	1
1210	3	0	1	1	1	1	1	33	2	1	2	2	16.6133	1	4	4	4	2	1	1	1	1	2	1		2	1	1	1	1	1
1211	3	0	1	1	1	1	1	27	2	1	2	2	20.7031	2	2	3	2	2	1	1	1	1	1	2	1	2	1	1	1	1	1
1212	3	2	1	2	1	1	1	22	1	1	2	2	19.8347	2	2	3	1	2	2	1	1	1	1	3	1	2	1	1	1	1	1
1213	3	0	2	1	1	1	1	22	1	1	3	3	21.4844	2	3	3	2	2	1	1	1	1	1	4	1	4	1	1	1	2	1
1214	3	0	2	1	1	1	1	22	1	1	3	3	23.8054	2	3	3	2	2	1	2	1	1	1	4	1	3	1	1	1	1	1
1215	3	0	1	1	1	1	1	25	1	1	4	4	20.5592	2	3	3	3	2	2	1	1	1	1	1	1	2	1	1	1	3	1
1216	3	0	1	1	1	1	1	26	2	1	2	2	22.6562	2	3	3	4	1	2	2	1	1	1	4		3	1	1	1	1	1
1217	3	0	1	1	1	1	1	31	2	1	2	3	23.7332	2	2	4	4	2	1	1	1	1	1	4	1	4	1	1	1	2	1
1218	3	0	1	1	1	1	1	30	2	1	3	3	18.9036	2	4	4	3	1	1	1	1	1	2	4	1	3	1	1	1	1	1
1219	2	0	1	1	1	1	1	18	1	1	3	4	20.3125	2	1	1	1	1	2	2	1	1	2	4	1	3	1	1	1	1	1
1220	3	0	1	1	1	1	1	20	1	1	3	3	23.1111	2	2	2	3	2	2	2	1	1	1	4		3	1	1	1	1	1
1221	2	0	1	1	1	1	1	35	3	1	2	3	20.9566	2	2	3	5	1	1	1	1	1	2	4	1	1	1	1	1	1	1
1222	3	0	1	1	1	1	1	23	1	1	2	2	18.7328	2	2	3	1	2	2	1	1	1	1	1		2	1	1	2	1	1
1223	3	0	1	1	1	1	1	26	2	1	2	1	19.91	2	2	3	3	1	1	1	1	1	1	4	1	2	2	1	1	1	1
1224	1	0	1	1	1	1	1	10	1	1	3	2	28.6726	3	3	2	4	1	2	1	1	1	2	1	1	3	1	1	1	1	1
1225	3	0	1	1	1	1	1	20	1	1	2	2	16.4444	1	4	3	2	2	2	1	1	1	1	3	1	2	1	1	1	1	1
1226	3	0	1	1	1	1	1	28	2	1	2	3	20.0288	2	4	4	3	1	1	1	1	1	2	4	1	3	1	1	1	1	1
1227	3	1	1	1	2	1	2	28	2	1	2	3	22.6562	2	3	3	3	1	2	2	1	1	1	3	1	2	1	1	1	1	1
1228	2	0	1	1	1	1	1	21	1	1	2	2	26.6667	3	4	4	3	2	1	1	1	1	1	4	1	1	1	1	1	1	1
1229	3	0	1	1	1	1	1	21	1	1	3	3	21.5139	2	4	4	3	1	1	1	1	1	2	4	1	4	1	1	1	2	1
1230	1	0	1	1	1	1	1	19	1	1	4	4	20.1951	2	1	1	1	2	2	2	1	1	2	4	1	3	1	1	1	3	1
1231	2	0	1	1	1	1	1	21	1	1	3	3	19.9792	2	3	2	1	1	2	1	1	1	1	4	1	1	1	1	1	1	1
1232	3	0	1	1	1	1	1	25	1	1	2	2	23.4952	2	4	3	3	2	1	1	1	1	1	2	1	2	1	1	1	1	1
1233	3	0	1	1	1	1	2	25	1	1	2	2	25.7778	3	3	3	2	1	2	1	1	1	1	4		3	1	1	1	1	1
1234	3	0	1	1	1	1	1	25	1	1	4	4	21.6441	2	3	3	4	1	1	1	1	1	1	4	1	1	1	1	1	3	1
1235	3	0	1	1	1	1	1	23	1	1	3	3	21.4844	2	2	3	3	2	1	1	1	1	1	3	1	2	1	1	1	1	1
1236	3	2	1	2	1	1	2	27	2	1	3	2	26.5643	3	3	3	1	1	2	1	1	1	1	4	1	3	1	1	1	1	1
1237	1	0	1	1	1	1	2	25	1	1	2	3	22.8928	2	2	3	2	1	1	2	1	1	1	4	1	1	1	1	1	1	1
1238	3	0	1	1	1	1	1	24	1	1	3	3	19.2894	2	2	4	1	2	2	1	1	1	2	4	1	4	1	1	1	2	1
1239	2	0	1	1	1	1	1	25	1	1	2	3	22.6003	2	1	3	2	1	1	1	1	1	1	4	1	1	1	1	1	1	1
1240	1	0	1	1	1	1	1	28	2	1	4	4	24.0882	3	1	2	1	1	2	2	1	1	1	4	1	3	1	1	1	3	1
1241	1	0	1	1	1	1	1	28	2	1	4	4	24.0882	3	1	2	1	1	2	2	1	1	1	4	2	3	1	1	2	3	1
1242	3	0	1	1	1	1	1	29	2	1	4	4	23.1405	2	3	3	3	2	2	1	1	1	1	1	1	2	1	1	1	3	1
1243	3	0	1	1	1	1	1	29	2	1	4	4	23.1405	2	3	3	3	2	2	1	1	1	1	1	1	2	1	1	2	3	1
1244	2	0	1	1	1	1	1	33	2	1	1	2	24.974	3	3	2	5	1	1	1	1	1	1	4	1	1	1	1	1	1	1
1245	1	0	1	1	1	1	1	28	2	1	2	2	25.4767	3	2	3	4	1	1	1	1	1	1	4	1	3	1	1	1	1	1
1246	2	0	1	1	1	1	1	20	1	1	3	3	18.026	1	2	3	1	1	2	1	1	1	1	4	1	1	1	1	1	1	1
1247	3	0	1	1	1	1	1	27	2	1	4	4	30.8532	3	4	4	2	1	1	1	1	1	1	4	1	3	1	1	1	3	1
1248	3	0	1	1	1	2	1	34	2	1	2	2	25.5937	3	2	3	3	1	1	1	1	1	2	4	1	2	1	1	1	1	1
1249	3	0	1	1	1	1	1	33	2	1	3	3	#VALUE!	3	2	3	1	2	2			1	2		1	2	1	1	1	1	1
1250	3	0	1	1	1	1	1	28	2	1	2	3	16.1942	1	3	4	1	2	2		1	1	2	4	1	4	1	1	1	2	1
1251	3	0	1	1	1	1	2	32	2	1	2	2	23.0469	2	4	4	2	1	1	1	1	1	1	4	1	4	1	1	1	2	1
1252	3	0	1	1	1	1	1	28	2	1	4	4	20.5457	2	3	3	1	1	2	1	1	1	1	4		3	1	1	1	3	1
1253	2	0	1	1	1	1	1	23	1	1	3	3	19.313	2	2	2	1	1	2	1	1	1	1	4	1	1	1	1	1	1	1
1254	3	2	1	2	1	1	1	26	2	1	3	3	18.4265	1	3	3	4	2	1	1	1	1	2	1		2	1	1	1	1	1
1255	3	0	1	1	1	1	1	26	2	1	2	2	21.3593	2	2	4	2	2	1	1	1	1	1	2	1	2	1	1	1	1	1
1256	3	0	1	1	1	1	1	24	1	1	3	3	18.3143	1	2	3	2	2	1	2	1	1	1	4		2	1	1	1	1	1
1257	3	0	1	1	1	1	1	25	1	1	2	2	17.2584	1	4	4	3	1	1	1	1	1	1	4	1	3	1	1	1	1	1
1258	2	0	1	1	1	1	1	31	2	1	3	2	20	2	3	3	3	1	1	1	1	1	2	1	1	3	1	1	1	1	1
1259	2	0	1	1	1	1	1	18	1	1	2	2	21.3039	2	2	2	4	1	2	2	2	1	1	4	1	1	1	1	1	1	1
1260	1	0	1	1	1	1	2	30	2	1	3	3	30.0433	3	2	2	5	1	1	1	1	1	2	4	1	1	1	1	1	1	1
1261	3	0	1	1	1	1	1	23	1	1	3	2	20.0288	2	3	3	3	1	2	2	1	1	1	4		2	1	1	1	1	1
1262	1	0	1	1	1	1	1	24	1	1	4	3	17.6254	1	2	2	1	1	2	2	1	1	1	4	1	3	1	1	1	3	1
1263	3	0	1	1	1	1	1	23	1	1	3	4	20.5457	2	2	4	1	2	2	1	1	1	1	4	1	3	1	1	1	1	1
1264	3	0	1	1	1	1	1	28	2	1	4	4	17.313	1	3	2	1	2	2	2	1	1	1	2	1	4	1	1	1	4	1
1265	3	0	1	1	1	1	2	23	1	1	4	4	21.3675	2	2	3	1	2	2	1	1	1	1	3	1	3	2	1	2	3	1
1266	3	0	1	1	1	1	1	21	1	1	3	3	20.7031	2	2	3	3	1	2	1	1	1	1	4	1	3	1	1	1	1	1
1267	3	0	1	1	1	1	1	25	1	1	3	4	19.9792	2	2	3	2	1	1	2	1	1	1	4	1	2	1	1	1	1	1
1268	2	0	1	1	1	1	1	23	1	1	2	3	17.6254	1	2	3	2	2	1	1	1	1	1	4	1	2	1	1	1	1	1
1269	3	0	1	1	1	1	1	26	2	1	3	3	20.9321	2	2	3	4	1	1	2	1	1	1	1	1	3	1	1	1	1	1
1270	3	0	1	1	1	1	2	31	2	1	2	2	25.6369	3	3	3	3	2	1	1	1	1	1	1		3	1	1	1	1	1
1271	3	0	1	1	1	1	1	18	1	1	2	2	16.8242	1	2	3	1	1	2	1	1	1	1	4		3	1	1	1	1	1
1272	3	0	1	1	1	1	1	15	1	1	1	4	24.3418	3	1	2	3	2	1	1	1	1	2	4	1	4	1	1	1	2	1
1273	2	0	1	1	1	1	1	34	2	1	2	2	19.6506	2	3	3	3	2	1	1	1	1	2	4	1	2	1	1	1	1	1
1274	1	0	1	1	1	1	1	36	3	1	2	2	19.8141	2	2	3	4	1	1	1	1	1	1	2	1	3	1	1	1	1	1
1275	1	0	1	1	1	1	1	35	3	1	4	4	21.3593	2	3	3	2	1	1	2	1	1	1	4	1	3	1	1	1	3	1
1276	2	0	1	1	1	1	2	24	1	1	3	4	18.4911	1	2	3	1	1	2	2	1	1	1	4	2	2	1	1	1	1	1
1277	1	0	1	1	1	1	1	40	3	1	2	2	21.0828	2	4	4	5	1	1	1	1	1	1	4	1	1	1	1	1	1	1
1278	3	0	1	1	1	1	1	20	1	1	2	2	20.83	2	2	3	3	2	1	1	1	1	1	2	1	2	1	1	1	1	1
1279	3	0	1	1	1	1	2	21	1	1	2	2	17.0656	1	4	4	2	1	1	1	1	1	1	4	1	3	1	1	1	1	1
1280	2	0	1	1	1	1	1	23	1	1	3	3	17.7999	1	3	3	2	1	2	1	1	1	1	4	1	1	1	1	1	1	1
1281	3	1	1	1	2	2	1	36	3	1	4	4	24.6094	3	2	2	3	2	1	2	1	1	1	1	1	2	1	1	1	3	1
1282	1	0	1	1	1	1	1	22	1	1	2	2	25.9695	3	2	3	2	1	1	1	1	1	1	4	1	4	1	1	1	2	1
1283	3	0	1	1	1	1	1	31	2	1	4	4	20.9572	2	2	1	2	2	2	2	1	1	2	1	1	4	1	1	1	4	1
1284	3	0	1	1	1	1	1	20	1	1	2	2	24.4473	3	4	4	2	1	1	1	1	1	1	4		4	1	1	1	2	1
1285	3	0	1	1	1	1	1	17	1	1	2	2	22.0317	2	4	4	2	1	1	1	1	1	2	4	1	3	1	1	1	1	1
1286	1	0	1	1	1	1	1	26	2	2	4	2	20.2848	2	2	3	4	1	1	1	1	1	1	4	1	3	1	1	1	3	1
1287	3	0	1	1	1	1	1	26	2	1	3	2	19.1001	2	1	3	2	2	2	1	1	1	1	1		2	1	1	1	1	1
1288	3	0	1	1	1	1	1	22	1	1	2	2	19.5312	2	2	3	4	2	2	2	1	1	1	3		1	1	1	1	1	1
1289	3	0	1	1	1	1	2	34	2	1	2	2	18.4265	1	3	3	4	2	1	1	1	1	1	1		2	1	1	1	1	2
1290	3	0	1	1	1	1	1	33	2	1	4	4	22.2222	2	1	1	2	2	1	1	1	1	2	1	1	1	1	1	1	3	1
1291	3	0	1	1	1	1	1	26	2	1	2	4	24.0346	3	3	3	1	2	2	1	1	1	1	1		2	1	1	1	1	1
1292	1	0	1	1	1	1	1	11	1	1	3	2	23.3844	2	2	1	3	1	2	1	1	1	2	1	1	4	1	1	1	2	1
1293	3	0	2	1	1	1	1	29	2	1	2	2	19.2277	2	2	3	1	2	2	1	1	1	1	2	1	2	1	1	1	1	1
1294	3	0	1	1	1	1	1	25	1	1	3	3	27.6888	3	3	2	2	2	1	1	1	1	2	4	1	4	1	1	1	2	1
1295	2	0	1	1	1	1	1	20	1	1	3	2	18.5108	2	3	3	3	2	2	2	1	1	2	1	1	1	1	1	1	1	1
1296	3	0	1	1	1	1	1	34	2	1	4	4	20.5761	2	1	1	4	2	1	2	1	1	2	4	1	3	1	1	1	3	1
1297	3	0	1	1	1	1	1	23	1	1	3	4	20.8117	2	4	4	1	2	2	1	1	1	1	4	1	3	1	1	1	1	1
1298	3	0	1	1	1	1	1	18	1	1	4	4	26.1719	3	1	1	3	1	1	2	1	1	1	4		4	1	1	1	4	1
1299	1	0	1	1	1	1	2	31	2	1	4	4	17.9982	1	3	1	1	1	2	2	1	1	2	4	1	3	1	1	1	3	1
1300	1	0	1	1	1	1	1	26	2	1	4	4	21.2183	2	2	2	1	2	2	2	1	1	1	3	1	2	1	1	1	3	1
1301	3	0	1	1	1	1	1	30	2	1	3	3	19.052	2	2	2	3	2	1	1	1	1	1	4		4	1	1	1	2	1
1302	3	0	2	1	1	1	1	28	2	1	2	3	20.1348	2	4	4	3	1	1	1	1	1	2	4	1	4	1	1	1	2	1
1303	3	0	1	1	1	1	1	27	2	1	2	3	28.8415	3	1	4	2	2	1	1	1	1	2	4	1	3	1	1	1	1	1
1304	3	0	2	1	1	1	1	28	2	1	3	2	22.0317	2	3	3	4	1	1	1	1	1	1	4	1	3	1	1	1	1	1
1305	2	0	1	1	1	1	1	26	2	1	2	2	18.7962	2	3	3	2	1	1	1	1	1	1	4	1	2	1	1	1	1	1
1306	3	0	1	1	1	1	1	25	1	1	2	3	21.4844	2	3	3	2	2	2	1	1	1	1	4	1	3	1	1	1	1	1
1307	3	0	1	1	1	1	1	36	3	1	2	3	19.3962	2	4	4	2	1	1	1	1	1	1	4		3	1	1	1	1	1
1308	2	0	1	1	1	1	1	30	2	1	4	3	20.202	2	4	2	3	2	1	2	1	1	2	4	1	2	1	1	1	3	1
1309	3	0	1	1	1	1	1	32	2	1	2	2	18.5529	2	3	3	3	1	1	2	1	1	1	3		3	1	1	1	1	1
1310	3	0	1	1	1	1	1	22	1	2	2	2	20	2	2	3	4	1	2	1	1	1	1	4	1	3	1	1	1	1	1
1311	1	0	1	1	1	1	1	34	2	1	1	2	21.6311	2	3	2	4	1	1	1	2	1	2	3	1	4	1	1	1	2	1
1312	3	0	1	1	1	1	1	34	2	1	2	3	26.8386	3	4	4	3	1	1	1	1	1	2	4	1	3	1	1	1	1	1
1313	1	0	1	1	1	1	1	19	1	1	3	4	18.026	1	3	3	5	1	2	1	1	1	1	4	1	3	1	1	1	1	1
1314	3	0	1	1	1	1	1	29	2	1	2	2	20.8889	2	2	4	1	2	1	1	1	1	1	2	1	2	1	1	1	1	1
1315	2	0	1	1	1	1	1	25	1	1	2	2	20.6905	2	3	3	2	2	1	1	1	1	1	4	1	1	1	1	1	1	1
1316	3	0	1	1	1	1	1	21	1	1	4	4	19.7711	2	3	3	1	2	2	1	1	1	1	2	1	2	1	1	1	3	1
1317	3	0	1	1	1	1	1	26	2	1	4	4	19.3625	2	3	3	2	1	1	2	1	1	1	4		2	1	1	1	3	1
1318	3	0	1	1	1	1	1	27	2	1	2	3	25.7117	3	2	4	2	1	1	1	1	1	2	4	1	3	1	1	1	1	1
1319	1	0	2	1	1	1	2	27	2	1	2	4	22.6562	2	2	3	1	1	2	2	1	1	2	1	1	4	1	1	1	2	1
1320	3	0	1	1	1	1	1	30	2	1	2	3	16.6493	1	2	3	3	2	1	2	1	1	2	2	1	3	1	1	1	1	1
1321	3	0	2	1	1	1	1	24	1	1	3	3	24.2424	3	3	3	3	1	2	1	1	1	2	4	1	3	1	1	1	1	1
1322	3	0	1	1	1	1	1	31	2	1	2	2	19.2277	2	4	4	3	1	1	1	1	1	1	4	1	3	1	1	1	1	1
1323	3	0	1	1	1	1	1	26	2	1	3	3	19.9792	2	4	4	4	1	1	1	1	1	1	4	1	3	1	1	1	1	1
1324	2	0	1	1	1	1	1	35	3	2	1	2	20.3954	2	2	3	3	1	1	1	1	1	1	4	1	1	1	1	1	1	1
1325	3	0	1	1	1	1	1	28	2	1	2	2	19.4674	2	3	3	4	1	2	1	2	1	1	4	1	3	1	1	1	1	1
1326	3	0	1	1	1	2	1	22	1	1	2	2	17.9089	1	3	3	1	2	2	1	1	1	1	1	1	2	1	1	1	1	1
1327	3	0	1	1	1	1	1	21	1	1	3	2	17.2248	1	2	3	3	1	1	1	1	1	1	1	1	3	1	1	1	1	1
1328	1	2	1	2	1	1	2	28	2	2	2	2	28.578	3	2	2	1	1	1	2	1	1	1	1	1	3	1	1	1	1	1
1329	3	1	1	1	2	2	1	35	3	1	2	2	24.974	3	4	3	3	2	1	1	1	1	1	3	1	2	1	2	1	1	1
1330	3	0	1	1	1	1	1	14	1	1	4	4	19.2277	2	3	1	1	1	2	2	1	1	1	4	1	3	1	1	1	3	1
1331	3	0	1	1	1	1	1	24	1	1	3	3	22.9591	2	4	2	1	1	2	1	1	1	2	4	1	4	1	1	1	2	1
1332	3	0	1	1	1	1	1	19	1	1	3	3	62.8715	3	2	2	4	1	1	2	1	1	2	1	1	3	1	1	1	1	1
1333	3	0	1	1	1	1	2	31	2	1	4	4	23.4375	2	3	1	1	1	1	1	1	1	1	4		4	1	1	1	4	2
1334	3	0	1	1	1	1	1	21	1	1	2	3	19.1467	2	2	3	1	1	2	1	1	1	2	4	1	3	1	1	1	1	1
1335	3	0	1	1	1	1	1	23	1	1	2	2	26.2985	3	3	3	2	2	2	1	1	1	2	4	1	3	1	1	1	1	1
1336	3	0	1	1	1	1	1	11	1	1	1	2	21.3593	2	2	2	3	2	1	1	1	1	2	3	1	3	1	1	1	1	1
1337	1	0	1	1	1	1	1	21	1	1	3	2	22.4323	2	3	3	5	1	2	1	1	1	1	4	1	3	1	1	1	1	1
1338	3	0	1	1	1	1	1	19	1	1	2	2	16.7969	1	2	3	1	2	2	1	1	1	1	1	1	2	1	1	1	1	1
1339	1	0	1	1	1	1	1	18	1	1	3	2	21.1111	2	2	1	1	1	2	1	1	1	2	4	1	3	1	1	1	1	1
1340	3	0	1	1	1	1	1	29	2	1	3	3	24.5446	3	3	3	3	1	2	1	1	1	1	3	1	2	1	1	1	1	1
1341	3	0	1	1	1	1	1	21	1	2	2	2	22.2222	2	4	4	4	2	1	1	1	1	2	1		2	1	1	1	1	1
1342	3	0	1	1	1	1	1	19	1	1	2	2	16.937	1	2	3	3	2	2	1	1	1	1	2		2	1	1	1	1	1
1343	3	0	1	1	1	1	1	30	2	1	3	3	19.4734	2	2	3	1	2	2	1	1	1	1	1	1	2	1	1	1	1	1
1344	3	0	1	1	1	1	1	26	2	1	2	3	18.4425	1	2	2	2	1	1	1	1	1	1	4		3	1	1	1	1	1
1345	3	0	1	1	1	1	2	33	2	1	1	3	19.9594	2	2	2	2	1	1	2	1	1	2	4	1	1	1	1	1	1	1
1346	3	0	1	1	1	1	1	41	3	1	2	2	17.7154	1	3	3	2	2	2	2	1	2	1	2	1	3	1	1	1	1	1
1347	3	0	1	1	1	1	1	24	1	1	2	2	20.9572	2	4	4	4	1	1	2	1	1	1	2	1	3	1	1	1	1	1
1348	3	0	1	1	1	1	1	30	2	1	1	2	20.2848	2	2	2	2	2	1	1	1	1	2	4	1	4	1	1	1	2	1
1349	2	0	1	1	1	1	1	32	2	1	2	3	20.5457	2	3	3	4	1	1	1	1	1	1	4	1	2	1	1	1	1	1
1350	3	0	1	1	1	1	1	30	2	1	4	4	19.052	2	3	2	1	1	1	2	1	1	1	4	1	4	1	1	1	4	1
1351	3	2	1	2	1	1	1	22	1	1	2	2	25.2363	3	3	3	4	1	1	1	1	1	1	2	1	4	1	1	1	2	1
1352	1	0	1	1	1	1	1	22	1	1	4	4	21.4536	2	2	3	1	1	2	1	1	1	1	4	2	3	1	1	1	3	1
1353	2	0	1	1	1	1	1	25	1	1	2	2	23.0112	2	3	2	4	1	1	1	1	1	2	4	1	3	1	1	1	1	1
1354	2	2	1	2	1	1	1	36	3	1	2	2	25.4767	3	2	3	3	1	1	2	1	1	1	4	1	3	1	1	1	1	1
1355	3	0	1	1	1	1	1	21	1	1	2	2	22.0317	2	4	4	1	1	2	1	1	1	2	4	1	3	1	1	1	1	1
1356	3	0	1	1	1	1	1	17	1	1	1	2	24.4646	3	3	2	3	1	1	1	1	1	1	4		3	1	1	1	1	1
1357	3	0	1	1	1	1	1	31	2	1	3	4	17.4818	1	3	2	2	1	2	2	1	1	1	4	1	2	1	1	1	1	1
1358	3	0	1	1	1	1	1	29	2	1	2	2	23.7332	2	3	4	3	1	1	1	1	1	1	4		3	1	1	1	1	1
1359	3	0	1	1	1	1	1	29	2	1	2	2	23.634	2	3	3	2	2	1	1	1	1	1	1	1	1	1	1	1	1	1
1360	3	0	1	1	1	1	1	18	1	1	4	4	19.7055	2	3	1	1	2	2	1	1	1	2	4	1	4	1	1	1	4	1
1361	3	0	1	1	1	1	1	33	2	1	4	4	20.5688	2	1	1	4	2	1	2	1	1	2	1	1	4	1	1	1	4	1
1362	3	0	1	1	1	1	1	24	1	1	4		16.3847	1		4	2	1	2	1	1	1	2	1	1	2	1	1	1	3	1
1363	3	0	1	1	1	1	1	24	1	1	3	3	21.2306	2	4	4	1	1	2	1	1	1	1	4		4	1	1	1	2	1
1364	3	0	1	1	1	1	1	22	1	1	2	2	20.6905	2	3	3	3	1	1	1	1	1	1	4	1	3	1	1	1	1	1
1365	3	0	1	1	1	1	1	25	1	1	2	2	22.5586	2	3	3	2	2	1	1	1	1	2	1	1	2	1	1	1	1	1
1366	3	0	1	1	1	1	1	26	2	1	3	3	21.2306	2	3	3	2	2	1	2	1	1	1	1	1	4	1	1	1	2	1
1367	3	0	1	1	1	1	1	22	1	1	3	2	19.563	2	2	2	1	2	2	1	1	1	1	2	1	2	1	1	1	1	1
1368	2	0	1	1	1	1	1	27	2	1	2	2	20.3954	2	3	3	2	2	1	2	1	1	1	4	1	2	1	1	1	1	1
1369	3	0	1	1	1	1	1	30	2	1	2	2	22.0604	2	4	4	2	1	1	1	1	1	1	4	1	3	1	1	1	1	1
1370	3	0	1	1	1	1	1	29	2	1	4	3	24.2439	3	4	2	3	2	1	1	1	1	2	4	1	4	1	1	1	4	1
1371	1	0	1	1	1	1	2	28	2	1	2	2	22.1893	2	2	3	4	1	1	1	1	1	1	1	1	3	1	1	1	1	1
1372	3	0	2	1	1	1	1	24	1	1	3	3	22.8928	2	2	3	3	2	1	2	1	1	1	4	1	2	1	1	1	1	1
1373	3	0	1	1	1	1	1	18	1	1	3	4	19.052	2	3	2	1	2	2	1	1	1	1	4		4	1	1	1	2	1
1374	3	0	1	1	1	1	2	27	2	1	2	2	25.1532	3	3	3	4	1	1	2	1	1	1	4		2	1	1	1	1	1
1375	1	0	1	1	1	1	1	35	3	1	2	2	28.3039	3	2	2	1	2	1	2	1	1	1	2	1	2	1	1	1	1	1
1376	3	0	1	1	1	2	1	28	2	1	1	2	24.3418	3	3	3	4	1	1	2	1	1	1	3	1	3	1	1	1	1	1
1377	3	0	1	1	1	1	1	31	2	1	4	3	20.202	2	4	1	1	2	2	1	1	1	1	4	1	4	1	1	1	4	1
1378	3	0	1	1	1	1	1	14	1	1	3	3	23.0112	2	3	1	2	2	2	2	1	1	2	1	1	3	1	1	1	1	1
1379	2	0	1	1	1	1	1	30	2	1	3	3	18.3143	1	2	3	2	1	1	2	1	1	2	4	2	2	1	1	1	1	1
1380	3	0	1	1	1	1	1	17	1	1	2	2	17.898	1	3	3	3	1	2	1	1	1	1	1	1	1	1	1	1	1	1
1381	3	0	1	1	1	1	2	14	1	1	3	2	18.026	1	3	2	3	2	1	1	1	1	1	4		3	1	1	1	1	1
1382	3	0	1	1	1	1	1	24	1	1	4	4	18.9036	2	3	3	3	2	2	1	1	1	1	1		2	1	1	1	3	1
1383	1	0	1	1	1	1	1	26	2	1	2	2	24.0346	3	3	3	5	1	1	1	1	1	1	1	1	3	1	1	1	1	1
1384	3	0	2	1	1	1	1	18	1	1	3	3	20.2848	2	2	4	1	2	2	1	1	1	1	4	1	4	1	1	1	2	1
1385	3	0	1	1	1	1	1	21	1	1	2	3	22.0386	2	3	3	4	1	1	1	1	1	1	4	1	2	1	1	1	1	1
1386	3	0	1	1	1	1	1	27	2	1	3	3	20.0288	2	2	2	2	2	1	1	1	1	1	4		3	1	1	1	1	1
1387	3	0	1	1	1	1	1	22	1	1	3	3	18.9866	2	2	2	1	2	2	1	1	1	2	4	1	4	1	1	1	2	1
1388	3	0	1	1	1	1	1	21	1	1	3	2	18.2563	1	3	3	3	2	2	1	1	1	1	1	1	2	1	1	1	1	1
1389	3	0	1	1	1	1	1	18	1	1	2	2	27.5556	3	4	3	3	1	2	1	1	1	1	4	1	3	1	1	1	1	1
1390	1	2	1	2	1	1	2	25	1	1	4	2	26.1719	3	4	3	3	2	2	2	1	1	2	1	1	1	1	1	1	3	1
1391	3	0	1	1	1	1	1	22	1	1	3	3	16.937	1	2	2	2	2	1	1	1	1	2	4	1	4	1	1	1	2	1
1392	3	0	1	1	1	1	1	29	2	1	2	3	17.6254	1	2	4	3	1	1	1	1	1	1	4	1	2	1	1	1	1	1
1393	3	0	1	1	1	1	1	15	1	1	4	4	16.1616	1	1	1	1	1	2	1	1	1	2	4	1	3	1	1	1	3	1
1394	3	0	2	1	1	1	1	25	1	1	3	3	23.3091	2	2	2	1	2	2	1	1	1	2	4	1	4	1	1	2	2	1
1395	1	0	2	1	1	1	1	21	1	1	2	2	19.9792	2	3	3	5	1	2	1	1	1	2	4	1	3	1	1	1	1	1
1396	3	0	1	1	1	1	1	32	2	1	2	2	17.3333	1	3	3	3	2	2	1	1	1	1	1		2	1	1	1	1	1
1397	1	0	1	1	1	1	1	20	1	1	4	2	16.0037	1	2	2	1	2	2	2	1	1	1	4	1	3	1	1	1	3	1
1398	3	0	2	1	1	1	1	32	2	1	4	3	25.7812	3	3	3	2	1	1	1	1	1	1	4	1	2	1	1	1	3	1
1399	3	0	1	1	1	1	1	26	2	1	2	2	25.8761	3	3	3	5	2	1	1	1	1	1	4	1	2	1	1	1	1	1
1400	3	0	1	1	1	1	1	22	1	1	2	2	27.8293	3	3	3	4	1	2	1	1	1	1	4	1	2	1	1	1	1	1
1401	3	0	1	1	1	2	1	28	2	1	3	2	23.2254	2	4	4	3	1	1	1	1	1	1	4	1	3	1	1	1	1	1
1402	3	0	1	1	1	1	2	33	2	1	2	2	24.9199	3	3	3	3	1	1	1	1	1	2	4	1	3	1	1	1	1	1
1403	2	0	1	1	1	1	1	10	1	1	1	2	17.898	1	3	2	3	1	1	1	1	1	2	1	1	3	1	1	1	1	1
1404	3	0	1	1	1	1	1	23	1	1	3	3	16.4366	1	3	3	3	2	2	2	1	1	1	3	1	3	1	1	1	1	1
1405	1	0	1	1	1	1	1	33	2	1	2	2	21.3675	2	3	3	2	2	1	2	1	1	1	4	1	2	1	1	1	1	1
1406	2	0	1	1	1	1	1	38	3	1	2	3	26.0262	3	3	3	3	2	1	1	1	1	1	4	1	1	1	1	1	1	1
1407	1	0	1	1	1	1	1	27	2	1	2	2	22.0604	2	3	3	2	1	1	1	1	1	1	4	1	1	1	1	1	1	1
1408	2	0	1	1	1	1	1	24	1	1	3	2	25.2241	3	2	3	1	1	2	1	1	1	1	4	1	3	1	1	1	1	1
1409	1	0	1	1	1	1	1	23	1	1	1	2	20.9042	2	2	3	2	2	1	2	1	1	1	4	1	3	1	1	1	1	1
1410	2	0	1	1	1	1	1	17	1	1	1	3	20.3954	2	2	2	3	1	2	1	1	1	2	4	1	1	1	1	1	1	1
1411	1	0	1	1	1	1	1	24	1	1	4	2	29.3848	3	2	3	5	1	1	1	1	1	1	4	1	2	1	1	1	3	1
1412	2	0	1	1	1	1	1	20	1	1	2	2	18.7962	2	2	3	1	1	2	1	1	1	2	4	1	1	1	1	1	1	1
1413	3	0	1	1	1	1	1	29	2	1	3	2	21.3593	2	3	3	3	1	1	1	1	1	1	4	1	3	1	1	1	1	1
1414	2	0	1	1	1	1	1	33	2	1	2	2	21.0303	2	2	3	4	2	2	1	1	1	1	4	1	2	1	1	1	1	1
1415	1	0	1	1	1	1	1	19	1	1	4	4	23.1473	2	1	1	3	1	1	2	1	1	2	4	1	3	1	1	1	3	1
1416	1	0	1	1	1	1	1	21	1	1	2	4	17.4044	1	2	3	1	1	2	1	1	1	1	4	1	2	1	1	1	1	1
1417	2	1	1	1	2	1	2	33	2	1	2	2	20.4294	2	3	3	4	1	1	1	1	1	1	4	1	1	1	1	1	1	1
1418	3	0	1	1	1	1	1	35	3	1	3	3	22.0317	2	3	3	3	1	1	1	1	1	1	4		3	1	1	1	1	1
1419	3	0	1	1	1	1	1	28	2	1	2	3	20.9572	2	4	4	2	1	1	1	1	1	1	4	1	3	1	1	1	1	1
1420	3	0	1	1	1	1	1	29	2	1	4	4	22.83	2	3	3	1	2	2	1	1	1	1	1		3	1	1	1	3	1
1421	3	0	1	1	1	1	1	16	1	1	2	3	20.3954	2	2	4	1	1	2	1	1	1	2	4	1	3	1	1	1	1	1
1422	1	0	1	1	1	1	1	17	1	1	1	3	21.2306	2	2	2	3	1	1		1	1	2	4	1	1	1	1	1	1	1
1423	1	0	1	1	1	1	1	21	1	2	4	4	21.6413	2	2	2	3	1	2	2	1	1	1	1	1	4	1	1	1	4	1
1424	3	0	1	1	1	1	1	29	2	1	2	2	20.6297	2	4	4	2	1	1	1	1	1	1	4	1	3	1	1	1	1	1
1425	3	0	1	1	1	1	1	24	1	1	2	2	20.7008	2	3	3	4	2	1	2	1	1	1	2	1	4	1	1	1	2	1
1426	1	0	1	1	1	1	1	23	1	1	2	4	19.1406	2	2	2	3	1	2	2	1	1	1	2	1	4	1	1	1	2	1
1427	3	0	1	1	1	1	1	24	1	1	2	2	34.1059	3	3	3	3	2	1	1	1	1	1	2		3	1	1	1	1	1
1428	3	0	1	1	1	1	1	27	2	1	3	4	29.34	3	3	2	2	2	1	1	1	1	2	4	1	5	1	1	1	2	1
1429	2	0	1	1	1	1	1	25	1	1	4	4	18.3143	1	2	2	1	2	2	2	2	1	1	4	1	2	1	1	1	3	1
1430	2	0	1	1	1	1	1	24	1	1	2	2	27.3438	3	2	3	2	1	1	1	1	1	1	4	1	1	1	1	1	1	1
1431	3	0	1	1	1	1	2	34	2	1	4	4	26.6016	3	2	1	1	1	2	1	1	1	2	4	1	5	1	1	1	4	1
1432	2	0	1	1	1	2	1	22	1	1	2	4	44.0771	3	2	3	5	1	1	2	1	1	1	4	1	1	1	1	1	1	1
1433	2	0	1	1	1	1	1	21	1	1	4	4	19.9219	2	3	3	1	2	2	1	1	1	1	4	1	1	1	1	1	3	1
1434	3	0	1	1	1	1	1	26	2	1	3	3	26.3465	3	2	2	3	1	1	2	1	1	1	4		2	1	1	1	1	1
1435	1	0	1	1	1	1	1	30	2	1	4	4	22.8928	2	2	1	4	2	1	2	1	1	2	4	2	4	1	1	1	4	1
1436	1	0	2	1	1	1	2	29	2	1	2	2	28.0404	3	2	3	1	1	1	2	1	1	1	1	1	2	1	1	1	1	1
1437	1	0	1	1	1	1	1	14	1	1	2	2	26.3465	3	2	1	3	1	2	1	2	1	1	2	1	1	1	1	1	1	1
1438	1	0	1	1	1	1	1	13	1	1	1	2	19.9792	2	2	2	4	1	2	1	1	1	1	4	1	1	1	1	1	1	1
1439	3	2	1	2	1	1	2	32	2	1	4	2	24.1672	3	3	2	3	1	1	2	1	1	1	4		2	1	1	1	3	1
1440	2	0	1	1	1	1	1	23	1	1	4	4	17.2584	1	1	3	1	1	2	2	1	1	1	4	1	3	1	1	1	3	1
1441	1	0	1	1	1	1	1	29	2	1	4	2	21.0828	2	3	3	5	1	1	2	1	1	1	1	1	5	1	1	1	4	1
1442	3	0	2	1	1	1	1	41	3	1	2	2	27.0552	3	2	3	3	1	1	1	1	1	1	4	1	3	1	1	1	1	1
1443	3	0	1	1	1	1	1	39	3	1	2	2	24.2439	3	3	3	4	2	1	1	1	1	1	4	1	2	1	1	2	1	1
1444	3	0	1	1	1	1	1	11	1	1	3	3	21.0077	2	2	2	2	2	1		1	1	2	4	1	4	1	1	1	2	1
1445	3	2	1	2	1	1	1	24	1	1	2	2	29.2101	3	4	4	2	1	1	1	1	1	1	4	1	3	1	1	1	1	1
1446	1	0	1	1	1	1	1	28	2	1	4	4	22.6562	2	2	3	1	2	2	2	2	1	1	1	1	2	1	1	2	3	1
1447	3	0	2	1	1	1	1	23	1	1	3	4	34.0785	3	1	4	4	2	1	1	1	1	2	4	1	4	1	1	1	2	1
1448	3	0	1	1	1	1	1	23	1	2	3	3	20.0288	2	3	3	2	1	1	2	1	1	2	4	1	3	1	1	2	1	1
1449	1	0	1	1	1	1	1	17	1	1	4	4	19.5312	2	1	1	1	1	2	2	2	1	2	4	1	1	1	1	1	3	1
1450	3	0	1	1	1	1	1	24	1	1	2	2	22.8928	2	3	2	2	2	1	1	1	1	2	2	1	2	1	1	1	1	1
1451	3	0	1	1	1	1	1	35	3	1	3	3	16.8242	1	3	2	3	1	1	2	1	1	1	1	1	2	1	1	1	1	1
1452	3	0	1	1	1	1	1	24	1	1	2	2	23.2335	2	4	4	2	1	1	1	1	1	1	4	1	3	1	1	1	1	1
1453	1	0	1	1	1	1	2	28	2	1	2	2	20.8117	2	3	3	5	1	1	2	1	1	1	4	1	2	1	1	1	1	1
1454	3	0	1	1	1	1	1	23	1	1	2	2	27.4762	3	3	3	3	1	1	1	1	1	1	4	1	2	1	1	1	1	1
1455	2	0	1	1	1	1	1	22	1	1	3	3	21.0938	2	2	2	3	1	2	1	1	1	1	4	1	1	1	1	1	1	1
1456	3	0	2	1	1	1	2	24	1	1	3	2	21.0938	2	4	2	2	1	1	1	1	1	1	4	1	3	1	1	1	1	1
1457	2	0	1	1	1	1	1	25	1	1	4	4	22.0604	2	3	2	4	1	1	1	1	1	1	4	1	3	1	1	1	3	1
1458	3	1	1	1	2	1	1	22	1	1	2	2	25	3	2	3	2	2	1	1	1	1	1	1	1	2	1	1	1	1	1
1459	3	0	1	1	1	1	2	34	2	1	3	3	22.6562	2	3	3	3	1	1	1	1	1	2	1	1	2	2	1	1	1	1
1460	3	0	1	1	1	1	1	27	2	1	3	4	23.8751	2	2	3	2	1	1	1	1	1	1	4		2	1	1	1	1	1
1461	3	0	1	1	1	1	1	38	3	1	2	2	24.7967	3	3	3	2	2	2	1	1	1	1	4	1	2	1	1	1	1	1
1462	1	0	1	1	1	1	1	24	1	1	4	2	21.5019	2	3	3	1	1	2	1	1	1	1	4	1	3	1	1	1	3	1
1463	3	0	1	1	1	2	1	37	3	1	1	2	23.6244	2	2	3	5	2	1	1	1	1	2	2	1	3	1	1	1	1	1
1464	1	0	1	1	1	1	1	38	3	1	3	2	23.7332	2	4	4	4	1	1	1	2	1	1	1	1	4	1	1	1	2	1
1465	3	0	1	1	1	1	1	24	1	1	4	4	19.2277	2	3	3	3	2	2	1	1	1	2	1		2	1	1	1	3	1
1466	3	0	1	1	1	1	1	36	3	1	3	3	26.1066	3	2	1	3	2	1	1	1	1	2	4	1	4	1	1	1	2	1
1467	3	0	1	1	1	1	2	33	2	1	4	4	21.6311	2	3	1	2	2	1	2	1	1	2	1	1	3	1	1	1	3	1
1468	3	0	1	1	1	1	1	21	1	1	2	2	18.8189	2	2	3	2	2	1	1	1	1	1	3	1	2	1	1	1	1	1
1469	1	0	1	1	1	1	1	25	1	1	2	2	17.313	1	3	3	5	1	1	1	1	1	2	1	1	4	1	1	1	2	1
1470	2	0	1	1	1	1	1	22	1	1	2	2	20	2	4	3	4	1	1	1	1	1	1	4	1	1	1	1	1	1	1
1471	2	0	1	1	1	1	1	32	2	1	2	2	22.8928	2	2	3	2	1	1	2	1	1	1	4	1	2	1	1	1	1	1
1472	2	2	2	2	1	1	1	31	2	1	3	3	19.6752	2	2	3	2	2	1	1	1	1	1	4	1	1	1	1	1	1	1
1473	1	0	1	1	1	1	1	23	1	1	2	2	22.8928	2	2	3	3	2	1	1	1	1	1	4	1	1	1	1	1	1	1
1474	3	0	1	1	1	2	1	20	1	1	2	1	19.1467	2	4	4	1	1	2	1	1	1	2	4	1	3	1	1	1	1	1
1475	2	0	1	1	1	1	1	26	2	1	4	4	22.1003	2	3	3	5	1	1	1	1	1	1	2	1	2	1	1	1	3	1
1476	2	0	1	1	1	1	1	19	1	1	4	4	18.3143	1	1	1	3	1	2	2	1	1	2	4	1	1	1	1	2	3	1
1477	2	0	2	1	1	1	1	32	2	1	2	2	25.9695	3	2	3	4	1	1	1	1	1	1	4	1	1	1	1	1	1	1
1478	2	0	1	1	1	1	1	32	2	1	4	4	21.6128	2	2	3	1	1	2	2	1	1	1	4	1	3	1	1	1	3	1
1479	2	0	1	1	1	1	1	19	1	1	3	3	16.1616	1	2	2	4	1	2	2	2	1	1	4	1	1	1	1	1	1	1
1480	3	0	1	1	1	1	1	20	1	1	2	2	22.8624	2	4	4	1	1	2	1	1	1	1	4		4	1	1	1	2	1
1481	3	0	1	1	1	1	1	25	1	1	3	3	24.2188	3	2	3	4	1	1	1	2	1	2	4		3	1	1	1	1	1
1482	1	0	1	1	1	1	1	30	2	1	4	4	21.436	2	3	1	2	1	1	1	1	1	2	4	1	4	1	1	1	4	1
1483	2	0	1	1	1	1	1	27	2	2	2	3	23.4375	2	3	2	3	1	1	1	1	1	1	4	1	2	1	1	1	1	1
1484	1	0	1	1	1	1	1	21	1	1	4	4	19.3337	2	2	3	1	1	2	2	1	1	1	4	1	3	1	1	1	3	1
1485	3	0	1	1	1	1	1	26	2	1	3	3	26.9531	3	2	3	2	1	1	2	1	1	2	2	1	2	1	1	1	1	1
1486	3	0	1	1	1	1	1	34	2	1	3	2	18.7305	2	3	3	3	1	1	1	1	1	1	4	1	3	1	1	1	1	1
1487	3	0	1	1	1	1	1	21	1	1	2	3	23.533	2	4	4	2	2	1	1	1	1	1	4	1	3	1	1	1	1	1
1488	3	0	2	1	1	2	2	27	2	1	2	2	21.3333	2	4	4	3	1	1	1	1	1	1	4	1	3	1	1	1	1	1
1489	2	0	1	1	1	1	1	23	1	1	4	3	17.9688	1	4	3	4	1	2	1	1	1	2	4	1	3	1	1	1	3	1
1490	3	0	1	1	1	1	1	23	1	1	2	2	22.806	2	2	3	2	1	1	1	1	1	1	4	1	3	1	1	1	1	1
1491	3	0	1	1	1	1	2	24	1	1	2	2	22.0604	2	2	3	3	1	1	1	1	1	1	4		3	1	1	1	1	1
1492	2	0	1	1	1	1	1	24	1	1	4	4	22.4996	2	2	2	4	1	2	1	1	1	1	1	1	4	1	1	1	4	1
1493	1	0	1	1	1	1	1	30	2	1	4	3	23.7253	2	2	2	2	1	1	1	1	1	1	1	1	3	1	1	1	3	1
1494	3	0	1	1	1	1	1	20	1	1	2	3	18.3594	1	4	4	1	1	2	1	1	1	1	4	1	4	1	1	1	2	1
1495	1	0	1	1	1	2	1	32	2	1	4	4	23.6614	2	3	3	2	2	1	2	1	1	1	4	1	2	1	1	1	3	1
1496	2	0	1	1	1	1	1	32	2	1	2	2	26.635	3	3	3	2	1	1	1	1	1	1	4	1	2	1	1	1	1	1
1497	3	0	1	1	1	1	1	25	1	1	2	2	20.0288	2	2	3	1	2	2	1	1	1	1	2		3	1	1	1	1	1
1498	3	0	1	1	1	1	1	24	1	1	3	3	20.4382	2	3	3	2	2	1	1	1	1	1	1	1	2	1	1	1	1	1
1499	1	0	1	1	1	1	1	21	1	1	2	3	27.5482	3	3	3	2	1	1	1	1	1	1	4	1	3	1	1	1	1	1
1500	1	0	1	1	1	1	1	25	1	1	4	4	17.0656	1	3	3	1	2	2	2	1	1	1	4	1	3	1	1	1	3	1
1501	3	0	1	1	1	2	2	22	1	1	4	4	20.5693	2	2	2	3	2	2	1	1	1	1	4	1	3	1	1	1	3	1
1502	3	0	1	1	1	1	1	28	2	1	2	4	17.5781	1	2	4	2	2	1	1	1	1	1	4	1	4	1	1	1	2	1
1503	3	0	1	1	1	1	1	24	1	1	3	3	27.8852	3	4	4	3	1	1	1	1	1	1	4		3	1	1	1	1	1
1504	3	0	1	1	1	1	1	25	1	1	4	4	17.4818	1	3	2	1	2	2	1	1	1	1	1		2	1	1	1	3	1
1505	3	0	1	1	1	1	1	21	1	1	3	3	19.9219	2	3	4	1	1	2	1	1	1	1	4	1	3	1	1	1	1	1
1506	2	0	1	1	1	2	1	41	3	1	2	2	22.4323	2	3	3	2	2	1	2	1	1	1	4	1	2	1	2	1	1	1
1507	3	0	2	1	1	1	2	42	3	1	2	2	25.4767	3	3	3	3	1	1	1	1	1	1	4	1	2	1	1	1	1	1
1508	3	0	1	1	1	1	1	22	1	1	2	2	18.6667	2	3	3	3	2	2	1	1	1	1	3		3	1	1	1	1	1
1509	2	0	1	1	1	1	1	24	1	2	4	4	23.4375	2	2	2	3	2	2	2	2	1	1	1	1	3	1	1	1	3	1
1510	2	0	1	1	1	1	1	30	2	1	2	3	20.2848	2	2	3	3	1	1	1	1	1	1	4	1	1	1	1	1	1	1
1511	1	0	1	1	1	2	1	34	2	1	2	3	24.0346	3	1	4	3	2	1	1	1	1	2	4	1	3	1	1	1	1	1
1512	3	0	1	1	1	1	1	40	3	1	1	1	24.0346	3	3	3	4	1	1	1	1	1	1	1	1	2	1	1	1	1	1
1513	2	0	1	1	1	1	1	34	2	1	1	2	28.3987	3	2	2	3	1	1	1	1	1	2	4	1	3	1	1	1	1	1
1514	3	0	1	1	1	1	1	27	2	1	3	4	22.4813	2	3	2	2	1	1	2	1	1	1	4	1	3	1	1	1	1	1
1515	3	0	1	1	1	1	1	30	2	1	3	3	25.204	3	3	3	4	2	1	1	1	1	1	1	2	2	1	1	1	1	1
1516	1	0	1	1	1	1	1	24	1	1	4	4	21.6311	2	2	2	1	1	2	2	1	1	2	4	1	3	1	1	1	3	1
1517	3	0	2	1	1	1	1	23	1	1	2	2	23.2254	2	3	3	4	2	1	1	1	1	1	1	1	2	1	1	1	1	1
1518	1	0	1	1	1	1	1	17	1	1	4	4	19.6283	2	1	1	1	1	2	2	1	1	2	4	1	4	1	1	1	4	1
1519	3	0	2	1	1	1	2	36	3	1	2	2	21.6441	2	3	2	2	1	1	1	1	1	2	1	1	2	1	1	1	1	1
1520	1	0	1	1	1	1	1	24	1	1	3	3	19.3337	2	3	3	3	2	2	2	1	1	1	4	1	1	1	1	1	1	1
1521	3	0	1	1	1	1	1	27	2	1	4	4	17.898	1	2	2	2	2	1	1	1	1	1	3	1	3	1	1	1	3	1
1522	1	0	1	1	1	1	1	29	2	1	2	1	22.6409	2	2	3	3	2	1	1	1	1	1	4	1	1	1	1	1	1	1
1523	2	0	1	1	1	1	1	29	2	1	3	3	23.6128	2	3	3	4	2	1	2	1	1	1	4	1	2	1	1	1	1	1
1524	2	0	1	1	1	1	1	23	1	1	1	2	18.132	1	4	4	5	1	1	2	1	1	2	4	1	3	1	1	1	1	1
1525	2	0	1	1	1	1	1	33	2	1	2	3	36.9822	3	4	4	4	2	1	1	1	1	1	4	1	1	1	1	1	1	1
1526	3	0	1	1	1	1	1	26	2	1	2	3	22.4059	2	4	4	3	2	1	1	1	1	1	4		3	1	1	1	1	1
1527	2	0	1	1	1	1	1	30	2	1	3	3	21.0938	2	3	3	3	1	1	2	1	1	2	4	1	3	1	1	1	1	1
1528	3	0	1	1	1	1	1	19	1	1	3	3	18.4911	1	3	3	3	2	2	1	1	1	1	1		2	1	1	1	1	1
1529	2	0	1	1	1	1	1	40	3	1	4	4	25.6821	3	2	3	4	1	1	1	1	1	2	4	1	1	1	1	1	3	1
1530	2	0	1	1	1	1	1	24	1	1	3	3	20.6905	2	2	3	3	1	2	2	1	1	1	4	1	1	1	1	1	1	1
1531	3	0	1	1	1	1	1	34	2	1	2	2	27.8876	3	3	4	3	1	1	1	1	1	2	4	1	2	1	1	1	1	1
1532	3	0	2	1	1	1	1	30	2	1	4	3	22.4323	2	4	2	1	2	2	1	1	1	2	4	1	3	1	1	1	3	1
1533	3	0	1	1	1	2	1	39	3	1	1	1	31.0094	3	3	3	3	1	1	1	1	1	2	1	1	2	1	1	1	1	1
1534	1	0	1	1	1	1	2	33	2	1	1	2	20.202	2	2	2	2	1	2	1	1	1	2	1	1	3	1	1	1	1	1
1535	2	0	1	1	1	1	1	19	1	1	2	2	19.2277	2	2	3	3	1	2	1	1	1	1	4	1	1	1	1	1	1	1
1536	3	0	1	1	1	1	1	19	1	1	1	2	18.3655	1	2	2	3	2	1	1	1	1	2	4	1	1	1	1	1	1	1
1537	3	0	1	1	1	1	1	18	1	1	4	4	18.3143	1	3	1	2	2	1	1	1	1	2	1	1	1	1	1	1	3	1
1538	3	0	1	1	1	1	1	22	1	1	3	2	18.1955	1	3	4	1	2	2	1	1	1	2	4	1	4	1	1	1	2	1
1539	3	0	1	1	1	1	1	26	2	1	3	3	20.3125	2	2	2	2	2	1	1	1	1	2	4	1	4	1	1	1	2	1
1540	1	0	1	1	1	1	1	26	2	1	4	3	17.7778	1	3	3	2	1	1	2	1	1	1	1	1	3	1	1	1	3	1
1541	1	0	1	1	1	1	1	13	1	1	2	4	22.6562	2	2	1	3	1	2	1	2	1	1	1	1	3	1	1	1	1	1
1542	3	0	1	1	1	1	1	36	3	1	2	2	21.6311	2	4	4	3	1	1	1	1	1	2	4	1	3	1	1	1	1	1
1543	3	0	1	1	1	1	1	16	1	1	3	3	20.8117	2	2	2	2	2	1	2	1	1	2	4		1	1	1	1	1	1
1544	1	0	1	1	1	1	1	33	2	2	4	4	19.6506	2	3	1	5	2	2	2	1	1	2	3	1	1	1	1	1	3	1
1545	3	0	1	1	1	1	1	26	2	1	3	3	16.8242	1	4	4	1	2	2	1	1	1	1	4		4	1	1	1	2	1
1546	3	0	1	1	1	1	1	21	1	1	2	2	20.3428	2	3	3	4	1	2	1	1	1	1	4	1	2	1	1	1	1	1
1547	2	0	1	1	1	1	1	23	1	1	2	2	28.764	3	2	3	2	1	1	1	1	1	1	4	1	1	1	1	1	1	1
1548	1	0	1	1	1	1	1	18	1	1	3	3	20.83	2	3	3	4	1	2	1	1	1	2	1	1	3	1	1	1	1	1
1549	1	0	1	1	1	1	1	16	1	1	3	1	20.8117	2	2	2	1	1	1	1	1	1	1	1	1	3	1	1	1	1	1
1550	1	0	1	1	1	1	1	27	2	1	3	3	16.9922	1	2	2	4	2	2	2	1	1	1	3	1	4	1	1	1	2	1
1551	3	0	1	1	1	1	1	29	2	1	2	2	22.0317	2	4	4	4	2	1	1	1	1	2	1	1	2	1	1	1	1	1
1552	3	0	1	1	1	1	1	29	2	1	2	2	24.8889	3	3	3	4	2	1	1	1	1	1	1	1	2	1	1	1	1	1
1553	3	0	1	1	1	1	1	43	3	1	2	2	20.83	2	4	4	4	1	1	1	1	1	1	4	1	3	1	1	1	1	1
1554	3	0	1	1	1	1	1	31	2	1	4	4	23.3091	2	3	1	1	1	2	2	1	1	1	4	2	4	1	1	1	4	1
1555	3	0	1	1	1	1	1	23	1	1	2	2	30.4688	3	2	3	1	2	2	1	1	1	1	1	1	2	1	1	1	1	1
1556	3	0	1	1	1	1	1	26	2	1	4	4	24.974	3	3	3	3	1	2	2	1	1	1	3	1	3	1	1	1	3	1
1557	3	2	1	2	1	1	1	23	1	1	3	3	17.6309	1	2	4	1	2	2	1	1	1	1	4	1	4	1	1	1	2	1
1558	3	0	1	1	1	1	1	31	2	1	2	3	20.5457	2	4	4	2	1	1	1	1	1	1	4	1	4	1	1	1	2	1
1559	2	0	1	1	1	1	1	22	1	1	2	4	17.898	1	2	2	1	2	2	2	1	1	1	2	1	3	1	1	1	1	1
1560	3	0	1	1	1	1	1	41	3	1	2	2	20.202	2	4	4	3	1	1	2	1	1	1	4	1	3	1	1	1	1	1
1561	3	2	1	2	1	1	1	24	1	2	2	2	27.3438	3	3	3	4	2	1	1	1	1	1	1	1	2	1	1	1	1	1
1562	1	0	1	1	1	1	1	18	1	1	4	4	41.66	3	3	1	3	1	2	2	1	1	1	4	1	4	1	1	2	4	1
1563	1	0	1	1	1	1	1	20	1	1	3	3	17.0656	1	3	3	4	2	2	1	1	1	1	4	1	4	1	1	1	2	1
1564	3	0	1	1	1	1	1	25	1	1	3	3	19.5312	2	3	3	3	2	2	1	1	1	1	1	1	2	1	1	1	1	1
1565	3	0	1	1	1	1	1	25	1	1	3	4	21.875	2	2	3	1	1	2	2	1	1	2	4	1	3	1	1	1	1	1
1566	1	0	1	1	1	1	1	28	2	1	2	2	24.6548	3	2	2	4	1	1	1	1	1	2	4	1	1	1	1	1	1	1
1567	3	0	1	1	1	1	1	28	2	1	2	2	20.9572	2	4	4	3	1	1	1	1	1	2	4	1	4	1	1	1	2	1
1568	3	0	1	1	1	1	2	16	1	1	1	2	20.2848	2	4	2	1	2	2	1	1	1	2	4	1	4	2	1	1	2	1
1569	2	0	1	1	1	1	1	26	2	1	3	4	17.9688	1	3	3	4	2	1	1	1	1	2	4	1	4	1	1	1	2	1
1570	3	0	1	1	1	1	1	26	2	1	2	1	19.8189	2	4	3	5	2	2	1	1	1	1	4	1	3	1	1	1	1	1
1571	3	0	1	1	1	1	1	31	2	1	2	2	18.7962	2	3	3	2	2	1	1	1	1	2	1	1	2	1	1	2	1	1
1572	2	0	1	1	1	1	1	22	1	1	4	4	17.9982	1	2	2	3	1	2	1	1	1	1	4	1	2	1	1	1	3	1
1573	2	0	1	1	1	1	1	35	3	1	1	2	22.1893	2	4	3	3	1	1	1	1	1	1	4	1	1	1	1	1	1	1
1574	3	0	1	1	1	1	1	30	2	1	4	4	24.2382	3	1	1	2	2	1	1	1	1	2	1		1	1	1	1	3	1
1575	3	0	1	1	1	1	1	23	1	1	2	2	22.3757	2	4	4	1	1	2	1	1	1	2	4	1	3	1	1	1	1	1
1576	3	0	1	1	1	2	2	28	2	1	2	2	17.2635	1	3	3	1	1	2	1	1	1	1	4	2	3	2	1	1	1	1
1577	1	0	1	1	1	1	1	26	2	1	2	4	20.5457	2	1	3	5	1	1	1	1	1	1	4	1	2	1	1	1	1	1
1578	3	0	1	1	1	1	1	29	2	1	4	4	17.4818	1	3	2	2	1	1	2	1	1	1	3	1	2	1	1	1	3	1
1579	3	0	1	1	1	1	1	33	2	1	2	2	19.5312	2	3	3	3	2	1	2	1	1	2	2		3	1	1	1	1	1
1580	1	0	1	1	1	1	1	24	1	1	4	2	19.4734	2	3	2	2	2	1	2	1	1	1	4	1	1	1	1	1	3	1
1581	3	0	1	1	1	1	1	26	2	1	3	3	21.0962	2	4	4	1	2	2	1	1	1	1	4	1	4	1	1	1	2	1
1582	3	0	1	1	1	1	1	31	2	1	2	2	23.5078	2	3	3	4	1	1	1	1	1	1	4		3	1	1	1	1	1
1583	3	0	1	1	1	1	1	29	2	1	2	3	22.4323	2	2	4	4	2	1	1	1	1	1	4		4	1	1	1	2	1
1584	1	0	1	1	1	1	1	15	1	1	4	4	19.5312	2	2	2	5	1	1	1	1	1	2	4	1	1	1	1	1	3	1
1585	3	0	1	1	1	1	1	15	1	1	4	4	18.8707	2	1	1	3	2	2	1	1	1	2	3	1	3	1	1	1	3	1
1586	3	0	1	1	1	1	1	23	1	1	3	3	23.3355	2	3	3	1	1	2	2	1	1	1	4	1	3	1	1	1	1	1
1587	3	0	1	1	1	1	1	42	3	1	2	2	23.74	2	3	3	4	2	1	1	1	1	1	1	1	2	1	1	1	1	1
1588	3	0	1	1	1	1	1	29	2	1	2	2	27.0552	3	3	3	3	2	1	1	1	1	1	4	1	2	1	1	1	1	1
1589	3	0	1	1	1	1	1	23	1	1	2	2	23.0469	2	4	4	3	2	2	1	1	1	2	1	1	2	1	1	1	1	1
1590	3	0	1	1	1	1	1	14	1	1	4	4	30.0914	3	1	1	1	2	2	1	1	1	1	4	1	4	1	1	1	4	1
1591	3	0	1	1	1	1	1	38	3	1	2	3	19.6283	2	2	3	1	1	2	2	1	1	2	4	1	3	1	1	1	1	1
1592	3	0	1	1	1	1	1	23	1	2	2	2	23.9224	2	4	4	1	2	2	2	1	1	2	4	1	2	1	1	1	1	1
1593	1	0	1	1	1	1	1	24	1	1	3	3	24.3418	3	2	2	4	1	1	1	1	1	2	1	1	3	1	1	1	1	1
1594	2	0	1	1	1	1	1	23	1	1	3	3	19.8178	2	2	2	3	1	1	1	1	1	2	4	1	1	1	1	1	1	1
1595	2	0	1	1	1	1	1	26	2	1	3	2	25.3333	3	2	3	3	2	2	1	1	1	1	4	1	2	1	1	1	1	1
1596	1	0	1	1	1	1	1	16	1	1	4	4	21.6311	2	2	2	4	1	2	1	1	1	2	4	1	3	1	1	1	3	1
1597	1	0	1	1	1	1	1	23	1	1	4	3	25.7117	3	2	2	3	1	2	1	1	1	1	4	1	2	1	1	2	3	1
1598	3	0	1	1	1	1	1	17	1	1	4	4	23.0681	2	4	1	2	1	2	2	1	1	2	4	1	4	1	1	1	4	1
1599	3	0	1	1	1	1	1	16	1	1	4	3	20.7031	2	2	2	3	2	2	2	1	1	2	1		1	1	1	1	3	1
1600	3	0	1	1	1	1	1	29	2	1	2	2	17.4818	1	3	3	3	2	2	1	1	1	1	1	1	2	1	1	2	1	1
1601	3	0	1	1	1	1	1	26	2	1	3	3	18.5901	2	4	4	2	2	1	1	1	1	1	4		4	1	1	1	2	1
1602	3	0	1	1	1	1	2	33	2	1	4	4	19.433	2	2	2	3	2	1	2	1	1	1	1	1	4	1	1	1	4	1
1603	3	2	1	2	1	1	1	31	2	1	2	2	25.7812	3	4	4	4	2	1	1	1	1	1	1	1	1	1	1	1	1	1
1604	2	0	1	1	1	1	1	23	1	1	2	2	19.1467	2	3	3	1	1	2	1	1	1	1	4	1	1	1	1	1	1	1
1605	1	0	1	1	1	1	1	21	1	1	2	3	20.83	2	3	3	5	1	1	1	1	1	1	4	1	3	1	1	1	1	2
1606	2	0	1	1	1	1	1	26	2	1	3	3	21.9261	2	2	2	4	1	1	1	1	1	1	4	1	1	1	1	1	1	1
1607	2	0	1	1	1	1	1	22	1	1	2	3	23.7332	2	2	3	3	1	2	1	1	1	1	2	1	1	1	1	1	1	1
1608	3	0	1	1	1	1	1	29	2	1	2	2	21.6441	2	4	4	1	1	2	1	1	1	1	4	1	3	1	1	1	1	1
1609	2	0	1	1	1	1	1	19	1	1	2	2	20.8117	2	2	3	2	1	2	1	1	1	1	2	1	3	1	1	1	1	1
1610	3	0	1	1	1	1	1	27	2	1	2	2	22.6409	2	2	3	2	2	1	1	1	1	1	1	1	2	1	1	1	1	1
1611	3	0	1	1	1	1	1	27	2	1	4	4	19.433	2	3	3	2	1	1	1	1	1	2	1	1	2	1	1	1	3	1
1612	2	0	1	1	1	1	1	25	1	1	2	2	22.2222	2	3	3	3	1	1	1	1	1	1	4	1	2	1	1	1	1	1
1613	1	0	1	1	1	1	1	19	1	1	1	2	24.8889	3	2	2	3	1	1	1	1	1	2	4	1	1	1	1	1	1	1
1614	3	0	1	1	1	1	1	27	2	1	2	2	19.9594	2	3	3	1	2	2	1	1	1	1	2	1	2	1	1	1	1	1
1615	3	0	1	1	1	1	1	24	1	1	2	2	21.2306	2	4	4	1	1	2	1	1	1	1	4		3	1	1	1	1	1
1616	1	0	1	1	1	1	1	25	1	2	3	3	23.8751	2	3	3	1	1	2	2	1	1	1	4	1	1	1	1	1	1	1
1617	3	0	1	1	1	1	1	25	1	1	2	2	22.6409	2	4	4	2	2	1	1	1	1	1	3		2	1	1	1	1	1
1618	3	0	1	1	1	1	1	31	2	1	4	4	17.5781	1	2	2	1	2	1	1	1	1	1	1	1	2	1	1	1	3	1
1619	2	0	1	1	1	1	1	31	2	1	4	4	19.1327	2	3	3	2	2	1	2	1	1	1	4	1	2	1	1	1	3	1
1620	3	0	1	1	1	1	1	32	2	1	2	2	24.4561	3	4	4	4	2	2	1	1	1	1	2	1	3	1	1	1	1	1
1621	1	0	1	1	1	1	1	31	2	1	4	4	22.68	2	1	1	2	1	1	2	1	1	2	1	1	3	1	1	1	3	1
1622	3	0	1	1	1	1	1	32	2	1	2	3	26.3465	3	4	4	3	1	1	1	1	1	1	2	1	3	1	1	1	1	1
1623	3	0	1	1	1	1	2	26	2	1	2	3	18.7305	2	3	4	1	1	2	1	1	1	1	4		3	1	1	1	1	1
1624	3	0	1	1	1	1	1	24	1	1	2	2	22.3757	2	2	4	2	1	1	1	1	1	2	4	1	3	1	1	1	1	1
1625	3	0	1	1	1	1	1	26	2	1	3	2	20.7031	2	2	2	3	1	1	1	1	1	2	4	1	3	1	1	1	1	1
1626	2	0	1	1	1	1	1	27	2	1	4	4	17.5781	1	1	2	3	1	2	1	1	1	2	4	1	3	1	1	1	3	1
1627	3	0	1	1	1	1	1	27	2	1	2	3	27.3438	3	2	4	3	2	1	1	1	1	1	4	1	3	1	1	1	1	1
1628	3	0	1	1	1	1	1	26	2	1	4	4	20.2848	2	3	3	3	2	1	1	1	1	1	1	1	3	1	1	1	3	1
1629	2	0	1	1	1	1	1	33	2	1	3	4	21.3333	2	3	3	3	1	1	2	1	1	2	4	1	4	1	1	2	2	1
1630	3	0	1	1	1	1	1	18	1	1	4	4	24.0346	3	1	1	2	1	1	2	1	1	2	4	1	3	1	1	1	3	1
1631	3	0	1	1	1	1	1	24	1	1	2	2	23.4375	2	3	3	3	2	2	1	1	1	1	1	1	2	1	1	1	1	1
1632	3	0	1	1	1	1	1	27	2	1	2	2	19.1467	2	2	4	2	2	1	1	1	1	1	3	1	2	1	1	1	1	1
1633	1	0	1	1	1	1	1	30	2	1	2	2	20	2	2	3	2	1	1	2	1	1	1	4	1	2	1	1	1	1	1
1634	2	0	1	1	1	1	1	27	2	1	2	2	20.9644	2	4	4	2	1	1	1	1	1	1	4	1	1	1	1	1	1	1
1635	2	0	1	1	1	1	1	23	1	1	3	2	25.0762	3	2	3	3	1	2	1	1	1	1	4	1	2	1	1	1	1	1
1636	3	0	1	1	1	1	1	26	2	1	2	2	21.7555	2	2	3	3	2	1	1	1	1	1	4	1	3	1	1	1	1	1
1637	3	0	1	1	1	1	1	30	2	1	3	3	18.4911	1	3	3	3	2	1	1	1	1	2	4	1	2	1	1	1	1	1
1638	1	0	1	1	1	1	1	31	2	1	1	2	23.2377	2	2	3	4	1	1	1	1	1	1	4	1	1	1	1	1	1	1
1639	1	0	1	1	1	1	1	20	1	1	2	2	27.7671	3	3	3	1	1	2	1	1	1	1	4	1	1	1	1	1	1	1
1640	1	0	1	1	1	1	1	15	1	1	4	4	17.0392	1	2	1	2	2	2	2	1	1	2	1	1	1	1	1	1	3	1
1641	3	0	1	1	1	2	2	37	3	1	4	4	26.7229	3	3	1	2	2	1	2	1	1	2	1	1	3	2	2	1	3	1
1642	1	2	1	2	1	2	1	32	2	1	3	3	32.0461	3	2	3	3	1	1	1	1	1	2	4	1	2	1	2	1	1	1
1643	2	0	1	1	1	1	1	25	1	1	2	2	19.9792	2	2	2	2	1	1	1	1	1	1	4	1	1	1	1	1	1	1
1644	2	0	1	1	1	1	1	23	1	1	2	2	18.2183	1	3	3	2	1	1	2	1	1	1	4	1	2	1	1	1	1	2
1645	3	0	2	1	1	1	1	28	2	1	2	2	17.3333	1	2	3	2	2	1	1	1	1	1	1	1	2	1	1	1	1	1
1646	2	0	1	1	1	1	1	32	2	1	2	2	24.3496	3	2	3	4	2	1	2	1	1	1	4	1	3	1	1	1	1	1
1647	1	0	1	1	1	2	2	32	2	1	4	4	25.2994	3	2	2	1	1	2	2	1	1	1	1	1	4	1	1	1	4	1
1648	3	0	1	1	1	1	1	19	1	1	2	3	20.061	2	2	4	1	1	2	1	1	1	1	4	1	3	1	1	1	1	1
1649	3	0	1	1	1	1	1	23	1	1	3	2	19.2234	2	2	3	2	1	1	2	1	1	2	2	1	2	1	1	1	1	1
1650	3	0	1	1	1	1	1	18	1	1	1	4	34.2813	3	3	2	2	2	1	1	1	1	1	4	1	3	1	1	1	1	1
1651	2	0	2	1	1	1	1	26	2	2	2	2	24.3496	3	3	3	5	1	1	2	1	1	1	1	1	3	1	1	1	1	1
1652	3	0	1	1	1	1	1	24	1	1	3	3	19.8141	2	4	4	1	1	2	1	1	1	1	4		3	1	1	1	1	1
1653	1	0	1	1	1	1	1	14	1	2	1	3	26.6667	3	3	2	2	2	2			1	2		1	1	1	1	1	1	1
1654	3	0	1	1	1	1	1	30	2	1	4	4	23.8672	2	3	3	2	2	1	2	1	1	1	1	1	3	1	1	1	3	1
1655	2	0	1	1	1	1	1	30	2	1	1	2	22.8928	2	2	3	3	1	1	1	1	1	2	4	1	1	1	1	1	1	1
1656	3	0	1	1	1	1	1	30	2	1	2	2	20.8117	2	3	4	4	1	1	1	1	1	1	4	1	3	1	1	1	1	1
1657	3	0	1	1	1	1	1	13	1	1	3	3	19.6283	2	2	2	1	2	2	2	1	1	2	4	1	1	1	1	1	1	1
1658	3	0	1	1	1	1	1	24	1	1	2	2	25	3	4	4	3	1	1	1	1	1	1	4	1	4	1	1	1	2	1
1659	3	0	1	1	1	1	1	35	3	1	4	2	22.5827	2	2	1	3	1	1	2	1	1	2	4	1	3	1	1	1	3	1
1660	2	0	1	1	1	1	1	22	1	1	3	3	22.0317	2	3	3	1	1	2	1	1	1	1	4	1	1	1	1	1	1	1
1661	3	0	1	1	1	1	2	27	2	1	2	2	21.4536	2	3	3	3	2	2	1	1	1	2	4		3	1	1	1	1	1
1662	3	0	1	1	1	2	1	32	2	1	2	3	12.8185	1	4	4	2	2	1	1	1	1	1	4	1	4	1	1	1	2	1
1663	1	0	1	1	1	1	1	26	2	1	2	2	26.6667	3	2	2	5	1	1	1	1	1	2	4	2	3	1	1	1	1	1
1664	3	0	1	1	1	1	1	31	2	1	3	3	19.5312	2	3	3	2	1	1	1	1	1	1	4		4	1	1	1	2	1
1665	1	0	1	1	1	1	1	28	2	1	2	3	22.2137	2	2	2	5	1	1	1	1	1	1	4	2	3	1	1	1	1	1
1666	3	0	1	1	1	1	1	26	2	1	3	3	18.9036	2	3	3	2	1	1	1	1	1	1	4	1	4	1	1	1	2	1
1667	3	0	2	1	1	2	1	25	1	1	4	4	20.0288	2	2	2	3	1	1	1	1	1	1	1	1	2	1	1	1	3	1
1668	2	0	1	1	1	1	1	30	2	1	4	4	17.4449	1	3	3	4	1	1	1	1	1	2	4	1	3	1	1	1	3	1
1669	2	0	1	1	1	1	2	28	2	1	2	2	23.8054	2	2	2	5	1	1	1	1	1	1	4	1	4	1	1	1	2	1
1670	3	0	1	1	1	1	1	31	2	1	4	4	22.8928	2	1	1	2	2	1	1	1	1	2	1	1	1	1	1	1	3	1
1671	3	0	1	1	1	1	2	30	2	1	1	1	27.3438	3	3	3	3	2	1	1	1	1	1	3	1	2	1	1	1	1	1
1672	3	0	1	1	1	1	1	26	2	1	3	3	19.1001	2	4	4	2	2	1	1	1	1	1	4	1	3	1	1	1	1	1
1673	3	0	1	1	1	1	1	18	1	1	2	2	20.8117	2	3	3	2	2	1	1	1	1	1	4		2	1	1	1	1	1
1674	3	0	1	1	1	1	2	32	2	1	4	4	20.83	2	3	3	2	2	1	1	1	1	1	1	1	2	1	1	1	3	1
1675	3	0	1	1	1	1	1	24	1	1	2	2	22.6667	2	3	3	2	2	1	1	1	1	1	1	1	2	1	1	1	1	1
1676	1	0	1	1	1	1	1	27	2	1	4	4	19.1467	2	2	3	1	1	2	2	1	1	1	4	2	2	1	1	1	3	1
1677	3	0	1	1	1	1	1	27	2	1	2	2	24	3	3	3	3	2	1	1	1	1	2	1	1	2	1	1	1	1	1
1678	3	0	1	1	1	1	1	30	2	1	2	2	22.8624	2	4	4	4	2	1	1	1	1	1	4	1	2	1	1	1	1	1
1679	3	0	1	1	1	1	1	26	2	1	2	2	21.8522	2	2	3	2	2	1	1	2	1	1	2	1	2	1	1	1	1	1
1680	3	0	1	1	1	1	1	31	2	1	3	3	23.0469	2	3	3	2	1	1	1	1	1	1	4	1	4	1	1	1	2	1
1681	3	0	1	1	1	1	1	28	2	1	2	2	19.5312	2	3	3	4	2	2	1	1	1	1	4	1	2	1	1	1	1	1
1682	3	0	1	1	1	1	1	19	1	1	3	4	20.6905	2	2	1	2	2	1	1	1	1	1	4	1	4	1	1	1	2	1
1683	1	0	1	1	1	1	1	26	2	1	4	2	20.2291	2	3	3	2	2	1	2	1	1	1	4	1	2	1	1	1	3	1
1684	2	0	2	1	1	1	1	22	1	2	4	2	20.0777	2	3	3	4	1	1	1	1	1	2	4	1	3	1	2	1	3	1
1685	3	0	1	1	1	1	1	28	2	1	3	2	22.4059	2	2	4	2	1	1	1	1	1	1	4		3	1	1	1	1	1
1686	3	0	1	1	1	1	1	41	3	1	2	2	21.4844	2	3	3	4	1	1	1	1	1	1	4	1	3	1	1	1	1	1
1687	3	0	1	1	1	1	1	24	1	1	2	2	20.1956	2	3	3	2	2	2	2	1	1	1	4	1	2	1	1	1	1	1
1688	3	2	1	2	1	1	1	20	1	1	2	2	21.7193	2	3	3	3	1	2	1	1	1	1	4	2	3	1	1	1	1	1
1689	3	0	1	1	1	2	1	24	1	1	1	2	22.8928	2	3	3	2	1	1	2	1	1	2	3	1	2	1	1	1	1	1
1690	3	0	1	1	1	1	1	25	1	1	2	2	18.5178	2	2	3	1	1	2	1	1	1	1	4	1	2	1	1	1	1	1
1691	3	0	1	1	1	1	1	26	2	1	2	2	19.6283	2	4	4	2	1	1	1	1	1	1	4		4	1	1	1	2	1
1692	1	0	1	1	1	1	1	16	1	1	4	4	23.8751	2	1	1	1	2	2	2	1	1	1	1	1	1	1	1	1	3	1
1693	2	0	1	1	1	1	1	30	2	1	4	2	17.4818	1	3	2	3	1	1	1	1	1	1	4	1	4	1	1	1	4	1
1694	3	0	1	1	1	1	1	25	1	1	2	2	24.0346	3	3	3	3	2	1	2	1	1	1	3	1	3	1	1	1	1	1
1695	3	0	1	1	1	1	1	22	1	1	4	4	24.1415	3	3	3	2	1	1	1	1	1	1	1		2	1	1	1	3	1
1696	2	0	1	1	1	1	1	27	2	1	2	2	19.8141	2	2	4	2	1	1	1	1	1	2	3	1	1	1	1	1	1	1
1697	2	0	1	1	1	1	2	17	1	1	4	4	20.2848	2	3	1	3	2	1	1	1	1	2	4	1	4	1	1	1	4	1
1698	3	0	1	1	1	1	1	28	2	1	3	3	16.2071	1	3	3	2	2	1	1	1	1	2	1	1	2	1	1	1	1	1
1699	3	0	1	1	1	1	1	24	1	1	2	2	24.0346	3	3	3	2	2	1	1	1	1	1	1	1	2	1	1	1	1	1
1700	3	0	1	1	1	1	1	29	2	1	4	4	21.3593	2	2	4	2	2	1	1	1	1	1	1	1	2	1	1	1	3	1
1701	3	0	1	1	1	1	1	11	1	1	1	3	21.6413	2	4	2	2	2	1	1	1	1	1	4		3	1	1	1	1	1
1702	2	0	1	1	1	1	1	18	1	1	1	2	22.2137	2	2	2	4	2	1	2	1	1	2	4	1	1	1	1	1	1	1
1703	3	0	1	1	1	1	1	31	2	1	2	2	21.4844	2	2	3	3	1	2	2	1	1	1	3		3	1	1	1	1	1
1704	2	0	2	1	1	1	1	28	2	1	2	2	19.7239	2	2	3	2	2	1	1	1	1	1	4	1	1	1	1	1	1	1
1705	3	0	1	1	1	1	1	29	2	1	4	3	17.3333	1	3	3	2	2	1	1	1	1	2	1	1	2	1	1	1	3	1
1706	3	0	1	1	1	1	1	22	1	2	3	3	24.0346	3	4	4	1	1	2	1	1	1	1	3	1	3	1	1	1	1	1
1707	3	0	1	1	1	1	1	26	2	1	2	2	17.5781	1	2	3	1	2	2	1	1	1	1	1		2	1	1	1	1	1
1708	3	0	1	1	1	1	1	25	1	1	4	4	17.5781	1	2	2	3	2	2	1	1	1	1	4		3	1	1	1	3	1
1709	3	0	2	1	1	1	1	22	1	1	2	2	20.8325	2	4	4	2	1	1	1	1	1	1	4		3	1	1	1	1	1
1710	3	0	1	1	1	1	1	17	1	2	4	4	22.6562	2	1	1	2	1	1	1	1	1	2	4	1	4	1	1	1	4	1
1711	3	0	1	1	1	1	1	26	2	1	3	3	23.4375	2	4	4	2	1	1	1	1	1	1	4	1	3	1	1	1	1	1
1712	1	0	1	1	1	1	1	18	1	1	2	4	21.2279	2	1	1	1	2	2	2	1	1	1	1	1	3	1	1	1	1	1
1713	3	0	1	1	1	1	1	21	1	1	2	3	23.3355	2	4	4	1	1	2	1	1	1	1	4		3	1	1	1	1	1
1714	1	0	1	1	1	1	1	27	2	1	4	4	18.3594	1	3	2	1	1	2	2	1	1	1	4	1	3	1	1	1	3	1
1715	2	0	1	1	1	1	1	24	1	1	3	3	19.1406	2	3	3	3	1	1	2	1	1	2	4	1	2	1	1	1	1	1
1716	3	0	1	1	1	1	1	23	1	1	3	3	21.9363	2	4	4	2	1	1	1	1	1	2	4	1	3	1	1	1	1	2
1717	3	0	1	1	1	1	1	34	2	1	2	2	23.7118	2	3	3	4	1	1	2	1	1	1	3	1	3	1	1	1	1	1
1718	3	0	1	1	1	1	1	32	2	1	3	3	27.5134	3	3	4	5	2	1	1	1	1	2	4	1	5	1	1	1	2	1
1719	1	0	1	1	1	1	1	33	2	1	3	2	21.3675	2	2	3	5	1	1	1	1	1	2	3	1	3	1	1	2	1	1
1720	3	0	1	1	1	1	2	25	1	1	4	4	19.8141	2	2	2	2	1	1	1	1	1	1	1		2	1	1	1	3	1
1721	3	0	1	1	1	1	1	31	2	1	4	4	16.4366	1	1	1	2	2	1	2	1	1	2	4		5	1	1	1	4	1
1722	3	0	1	1	1	1	1	31	2	1	3	3	25.8065	3	3	3	1	2	2	1	1	1	1	4		2	1	1	1	1	1
1723	1	0	1	1	1	1	1	22	1	1	2	2	19.1111	2	2	3	1	1	2	1	2	1	1	1	1	2	1	1	1	1	1
1724	1	0	1	1	1	1	2	25	1	1	4	4	19.052	2	3	3	4	1	2	2	1	1	1	4	1	2	1	1	1	3	1
1725	3	0	1	1	1	1	1	28	2	1	4	4	21.7193	2	2	2	1	1	2	1	1	1	1	4	1	3	1	1	1	3	1
1726	3	0	1	1	1	1	1	18	1	1	2	2	17.7999	1	3	3	1	1	2	1	1	1	2	4	1	3	1	1	1	1	1
1727	3	0	1	1	1	1	2	25	1	1	4	4	29.4321	3	3	3	1	2	2	1	1	1	1	1	2	2	1	1	1	3	1
1728	3	0	1	1	1	1	1	16	1	1	1	2	24.9108	3	3	2	3	1	1	1	1	1	2	4	1	1	1	1	1	1	1
1729	1	0	1	1	1	1	1	31	2	2	4	4	18.5529	2	1	1	4	1	2	1	1	1	1	4	1	4	1	1	1	4	1
1730	3	0	1	1	1	1	1	23	1	1	2	2	15.0597	1	2	4	1	2	2	1	1	1	1	1	1	2	1	1	2	1	1
1731	3	0	1	1	1	1	1	16	1	1	4	4	22.3757	2	2	1	1	1	2	1	1	1	1	4		4	1	1	1	4	1
1732	3	0	1	1	1	1	1	31	2	1	1	3	19.4734	2	2	2	2	2	1	1	1	1	2	4	1	4	1	1	1	2	1
1733	3	0	1	1	1	1	1	23	1	2	3	3	25.1486	3	3	3	3	2	2	2	1	1	1	4	1	2	1	1	1	1	1
1734	3	0	2	1	1	1	1	35	3	1	3	3	19.1406	2	3	3	2	1	1	1	1	1	1	4	1	4	1	1	1	2	1
1735	1	0	1	1	1	1	2	15	1	1	2	4	20.4444	2	3	1	1	1	2	2	1	1	1	2	1	1	1	1	1	1	1
1736	3	0	1	1	1	1	1	31	2	1	3	2	21.4844	2	3	3	4	1	1	1	1	1	1	4	1	3	1	1	1	1	1
1737	3	0	1	1	1	1	1	20	1	1	4	3	27.0538	3	4	2	3	2	1	1	1	1	2	4	1	4	1	1	1	4	1
1738	3	0	2	1	1	1	1	30	2	1	3	3	20.9644	2	4	4	3	2	1	1	1	1	2	4	1	4	1	1	1	2	1
1739	1	0	1	1	1	1	1	25	1	1	2	3	19.2277	2	3	3	4	1	1	2	1	1	1	1	1	4	1	1	1	2	1
1740	3	0	1	1	1	1	2	30	2	1	1	3	26.7094	3	2	2	2	2	1	1	1	1	2	4	1	3	2	1	1	1	1
1741	1	0	1	1	1	1	1	22	1	1	3	3	18.591	2	2	3	2	1	1	1	1	1	2	1	1	3	1	1	1	1	1
1742	3	0	1	1	1	1	1	23	1	1	4	4	21.3382	2	1	3	3	1	2	2	1	1	1	4	1	2	1	1	1	3	1
1743	3	0	1	1	1	1	2	29	2	1	2	2	18.3594	1	4	4	3	1	1	1	1	1	1	2	1	3	1	1	1	1	1
1744	3	0	1	1	1	1	1	31	2	1	4	4	22.4813	2	1	1	2	1	1	1	1	1	2	4	1	4	1	1	1	4	1
1745	3	0	1	1	1	1	1	36	3	1	2	2	26.6667	3	4	4	3	2	1	1	1	1	2	1	1	2	1	1	1	1	1
1746	3	0	1	1	1	1	1	23	1	1	2	2	20.3125	2	3	3	4	2	1	1	1	1	1	1		1	1	1	1	1	1
1747	1	0	1	1	1	1	1	30	2	1	2	2	21.3039	2	3	3	4	1	1	1	1	1	1	4	1	3	1	1	1	1	1
1748	3	0	1	1	1	1	1	21	1	1	2	2	23.4375	2	2	3	1	2	2	1	1	1	1	2		3	1	1	1	1	1
1749	3	0	1	1	1	1	1	26	2	1	3	3	24.6548	3	3	3	2	2	1	2	1	1	1	4		5	1	1	1	2	1
1750	3	0	1	1	1	1	1	26	2	1	2	2	21.6311	2	2	3	2	2	1	1	1	1	1	1	1	2	1	1	1	1	1
1751	3	0	1	1	1	1	1	23	1	1	2	2	18.3143	1	3	3	1	2	2	1	1	1	1	1	1	4	1	1	1	2	1
1752	3	0	1	1	1	1	1	18	1	1	2	2	20.4467	2	4	4	1	1	2	1	1	1	2	4	1	3	1	1	1	1	1
1753	1	0	1	1	1	1	1	26	2	1	2	2	28.3039	3	2	3	5	1	1	1	1	1	1	1	2	3	1	1	1	1	1
1754	3	0	1	1	1	1	1	39	3	1	2	2	23.4375	2	3	3	4	2	1	1	1	1	1	4	1	3	1	1	1	1	1
1755	3	0	1	1	1	1	1	22	1	1	2	2	16.4444	1	3	3	4	2	2	1	1	1	1	4	1	3	1	1	1	1	1
1756	3	0	1	1	1	1	1	27	2	1	2	2	21.6041	2	4	4	1	1	2	1	1	1	1	4		3	1	1	1	1	1
1757	1	0	1	1	1	1	1	33	2	1	2	2	23.1247	2	3	3	3	1	1	2	1	1	1	3	1	2	1	1	1	1	1
1758	2	0	1	1	1	1	1	24	1	1	2	3	25.0657	3	2	3	3	1	1	1	1	1	2	4	1	1	1	1	1	1	1
1759	1	0	1	1	1	1	1	34	2	1	1	2	20.3428	2	2	2	2	1	1	1	1	1	2	4	1	1	1	1	1	1	1
1760	3	0	1	1	1	1	1	21	1	1	3	3	18.8271	2	3	3	4	2	2	1	1	1	1	3	1	3	1	1	1	1	1
1761	3	0	1	1	1	1	1	23	1	1	2	2	24.1672	3	4	4	1	1	2	1	1	1	2	4	1	3	1	1	1	1	1
1762	1	0	1	1	1	1	1	21	1	1	3	4	20.0287	2	3	3	1	1	2	2	1	1	1	4	1	3	1	1	1	1	1
1763	1	0	1	1	1	1	1	23	1	1	2	1	22.6562	2	1	3	5	1	1	1	1	1	1	4	1	3	1	1	1	1	2
1764	1	0	1	1	1	1	1	21	1	1	4	3	19.1406	2	2	3	3	1	2	1	1	1	2	1	1	3	1	1	1	3	1
1765	3	0	1	1	1	1	2	17	1	2	4	4	22.8928	2	3	1	1	2	2	2	1	1	2	4	1	1	1	1	1	3	1
1766	3	0	1	1	1	1	1	30	2	1	4	4	21.2306	2	1	1	1	1	2	2	1	1	1	4	1	4	1	1	1	4	1
1767	3	0	1	1	1	1	1	36	3	1	4	4	22.8624	2	2	2	2	2	1	2	1	1	1	1	1	4	1	1	1	4	2
1768	3	0	1	1	1	1	1	30	2	1	2	2	18.4265	1	2	4	5	1	1	1	1	1	1	4		2	1	1	1	1	1
1769	3	0	1	1	1	1	1	25	1	1	3	3	19.1406	2	3	3	3	2	1	1	1	1	1	4	1	3	1	1	1	1	1
1770	3	2	1	2	1	1	1	25	1	1	2	4	19.5556	2	2	3	3	2	1	1	1	1	1	3		3	1	1	1	1	1
1771	1	0	1	1	1	1	1	40	3	1	2	2	22.2137	2	2	3	5	1	1	1	1	1	1	4	1	3	1	1	1	1	1
1772	2	0	1	1	1	1	1	22	1	1	3	4	19.9219	2	3	3	1	1	2	2	1	1	1	4	1	2	1	1	1	1	1
1773	3	0	1	1	1	1	1	25	1	1	2	2	20.8325	2	4	4	2	1	1	1	1	1	1	4	1	4	1	1	2	2	1
1774	1	0	1	1	1	1	1	32	2	1	2	2	19.4771	2	2	2	1	2	1	2	1	1	1	4	1	2	1	1	1	1	1
1775	3	0	1	1	1	1	1	39	3	1	3	4	22.8329	2	3	3	2	1	1	1	1	1	1	4	1	2	1	1	1	1	1
1776	3	0	2	1	1	1	1	23	1	1	2	3	19.8141	2	4	4	1	1	2	1	1	1	1	4	1	3	1	1	1	1	1
1777	1	0	1	1	1	1	1	19	1	1	2	2	19.4734	2	2	2	4	1	1	1	1	1	2	1	1	3	1	1	1	1	1
1778	2	0	1	1	1	1	1	22	1	2	4	2	18.1955	1	2	2	1	1	2	2	1	1	1	4	1	2	1	1	1	3	1
1779	3	0	1	1	1	1	1	30	2	1	1	1	22.0317	2	2	2	4	2	2	2	1	1	1	4		1	1	1	1	1	1
1780	1	0	1	1	1	1	1	32	2	1	3	2	21.2279	2	2	4	3	1	1	1	1	1	2	4	1	3	1	1	1	1	1
1781	3	0	1	1	1	1	2	36	3	1	4	4	33.3866	3	4	1	3	2	1	1	1	1	2	4	1	3	2	1	1	3	2
1782	3	0	1	1	1	2	1	19	1	1	4	4	26.0375	3	1	1	4	2	2	1	1	1	2	4	1	1	1	1	1	3	1
1783	3	0	1	1	1	1	1	39	3	1	3	2	25.711	3	2	2	2	2	1	1	1	1	2	4	1	4	1	1	1	2	1
1784	1	0	1	1	1	1	1	27	2	1	2	2	22.0317	2	3	3	5	1	1	1	1	1	1	2	1	3	1	1	1	1	1
1785	3	0	1	1	1	1	1	28	2	1	2	2	19.9792	2	3	3	2	2	1	1	1	1	1	1	1	2	1	1	1	1	1
1786	3	0	1	1	1	1	1	29	2	1	2	2	22.719	2	3	3	3	2	2	1	1	1	1	4	1	3	1	1	1	1	1
1787	3	0	1	1	1	2	1	30	2	1	3	4	24.974	3	1	1	3	2	1	1	1	1	2	4	1	4	1	2	1	2	1
1788	3	0	1	1	1	1	1	27	2	1	2	2	19.9219	2	3	3	2	2	1	2	1	1	2	2	1	2	1	1	1	1	1
1789	3	0	1	1	1	1	2	30	2	1	3	3	24.3418	3	3	3	2	1	1	1	1	1	2	1	1	2	2	1	2	1	1
1790	3	0	1	1	1	1	2	27	2	1	3	3	18.2615	1	3	3	3	2	2			1	2		1	2	1	1	1	1	1
1791	3	0	1	1	1	1	1	25	1	1	4	4	23.4952	2	3	3	3	2	2	1	1	1	1	1	1	2	1	1	1	3	1
1792	3	0	1	1	1	1	1	26	2	1	2	2	21.4844	2	3	3	4	1	1	1	1	1	2	1	1	1	1	1	1	1	1
1793	3	0	1	1	1	1	1	28	2	1	2	2	19.6311	2	2	3	3	1	1	1	1	1	1	1	1	2	1	1	1	1	1
1794	3	0	1	1	1	1	1	26	2	1	4	4	19.1467	2	2	3	1	2	2	1	1	1	1	2		2	1	1	1	3	1
1795	3	0	1	1	1	1	1	26	2	1	4	4	18.8588	2	2	3	1	2	2	1	1	1	1	2	1	2	1	1	1	3	1
1796	2	0	1	1	1	1	1	22	1	1	2	2	24.6548	3	2	3	3	1	2	1	1	1	1	4	1	1	1	1	1	1	1
1797	2	0	2	1	1	2	1	28	2	1	2	4	21.3333	2	2	4	5	2	1	2	1	1	1	3	1	1	1	1	1	1	1
1798	3	0	1	1	1	1	1	31	2	1	2	2	23.2377	2	3	3	3	2	2	1	1	1	1	4	1	2	1	1	1	1	1
1799	3	1	1	1	2	1	1	28	2	1	2	3	23.634	2	4	3	2	2	1	2	1	1	1	4		5	1	1	1	2	1
1800	3	0	1	1	1	1	1	15	1	1	4	4	22.5466	2	1	1	4	2	2	2	1	1	2	4	1	4	1	1	1	4	1
1801	3	0	1	1	1	1	1	37	3	1	3	3	22.3757	2	3	3	4	1	1	1	1	1	1	4	1	4	1	1	1	2	1
1802	2	0	1	1	1	1	1	22	1	1	2	2	19.8347	2	3	3	2	1	1	2	1	1	1	4	1	1	2	1	1	1	1
1803	3	0	1	1	1	1	2	11	1	1	4	3	29.9688	3	4	1	4	2	2	1	1	1	2	4	1	4	1	1	2	4	1
1804	3	0	1	1	1	1	1	35	3	1	2	2	21.6713	2	3	3	4	1	1	1	1	1	2	4	1	2	1	1	1	1	1
1805	3	0	1	1	1	1	1	22	1	1	2	2	20.7031	2	3	3	3	2	1	1	1	1	1	1	1	2	1	1	1	1	1
1806	2	1	2	1	2	1	2	33	2	1	4	4	22.2063	2	1	2	2	1	1	1	1	1	2	1	1	3	1	1	1	3	1
1807	3	0	1	1	1	1	1	23	1	1	4	4	19.3821	2	1	3	4	2	2	1	1	1	1	4		3	1	1	1	3	1
1808	2	0	1	1	1	1	1	29	2	2	4	4	21.3333	2	2	3	1	1	2	2	1	1	2	4	1	3	1	1	1	3	1
1809	3	0	1	1	1	1	1	29	2	1	2	2	19.5312	2	2	3	2	2	1	1	1	1	1	1	1	2	1	1	2	1	1
1810	3	0	1	1	1	1	2	24	1	1	3	3	18.8271	2	3	4	2	1	1	1	1	1	1	4	1	3	1	1	1	1	1
1811	3	0	1	1	1	1	1	19	1	1	1	3	28.3987	3	2	2	2	2	1	1	1	1	2	4	1	4	1	1	1	2	1
1812	1	0	1	1	1	1	1	27	2	1	4	4	20.9572	2	2	2	3	1	2	1	1	1	1	4	1	2	1	1	1	3	1
1813	3	0	1	1	1	1	2	23	1	1	2	2	17.313	1	4	4	5	1	1	1	1	1	2	4	1	4	1	1	1	2	1
1814	3	0	1	1	1	1	1	22	1	1	2	2	17.9418	1	3	3	3	2	2	2	1	1	1	4	1	3	1	1	2	1	1
1815	3	0	1	1	1	1	1	23	1	1	2	3	18.2899	1	4	4	1	2	2	1	1	1	1	4		3	1	1	1	1	1
1816	3	0	1	1	1	1	1	29	2	1	2	2	22.2222	2	3	3	5	1	1	2	1	1	1	4		2	1	1	1	1	1
1817	2	0	1	1	1	1	1	31	2	1	2	4	20.3125	2	3	3	3	1	1	2	1	1	1	2	1	2	1	1	1	1	1
1818	3	0	1	1	1	1	1	29	2	1	3	3	20.8209	2	3	3	3	2	1	1	1	1	1	4	1	4	1	1	1	2	1
1819	3	0	2	1	1	1	1	28	2	1	3	3	23.8281	2	3	3	3	1	1	1	1	1	1	4	1	3	1	1	1	1	1
1820	3	0	1	1	1	1	1	28	2	1	2	2	21.4844	2	2	3	1	2	2	1	1	1	2	4	1	2	1	1	1	1	1
1821	1	0	1	1	1	1	1	34	2	1	2	3	20.7031	2	3	3	3	2	1	1	1	1	1	4	1	2	1	1	1	1	1
1822	3	0	1	1	1	1	1	24	1	1	3	3	23.6244	2	3	3	4	2	1	1	1	1	1	1	1	2	1	1	1	1	1
1823	2	0	1	1	1	1	1	18	1	1	4	4	20.6852	2	2	1	4	2	2	2	1	1	2	4	1	3	1	1	1	3	1
1824	2	0	1	1	1	1	1	29	2	1	2	2	26.2227	3	3	3	3	1	1	1	1	1	1	4	1	1	1	1	1	1	1
1825	3	0	2	1	1	2	1	38	3	1	1	2	24.4646	3	3	4	4	1	1	1	1	1	2	4	1	2	1	1	1	1	1
1826	3	0	2	1	1	1	2	27	2	1	2	2	21.0938	2	4	4	3	1	1	1	1	1	2	4	1	3	1	1	1	1	2
1827	3	0	1	1	1	1	1	17	1	1	3	3	23.3234	2	4	4	1	1	2	1	1	1	1	4	1	3	1	1	1	1	1
1828	1	0	1	1	1	1	1	29	2	1	2	2	18.7305	2	2	3	5	1	1	1	1	1	1	4	1	1	1	1	1	1	1
1829	3	0	1	1	1	1	1	33	2	1	2	2	26.8544	3	4	4	5	1	1	1	1	1	2	4	1	3	1	1	1	1	1
1830	3	0	1	1	1	1	1	27	2	1	3	3	22.719	2	2	3	2	2	1	2	1	1	1	4	1	2	1	2	1	1	1
1831	3	0	1	1	1	1	1	24	1	1	3	3	21.7555	2	4	4	1	1	2	1	1	1	1	4		3	1	1	1	1	1
1832	3	0	1	1	1	1	1	24	1	1	2	2	21.4309	2	3	3	2	2	1	1	1	1	1	4	1	3	1	1	1	1	1
1833	3	1	1	1	2	1	1	18	1	1	2	2	20.83	2	3	3	4	1	2	1	1	1	2	4	1	3	1	1	1	1	1
1834	3	0	2	1	1	1	1	24	1	2	2	1	19.1111	2	3	3	1	1	2	1	1	1	2	4	1	2	1	1	1	1	1
1835	1	0	1	1	1	1	1	23	1	1	3	4	20.6905	2	2	3	3	1	1	2	1	1	2	1	1	2	1	1	1	1	1
1836	3	0	1	1	1	1	1	26	2	1	2	2	18.3594	1	4	4	2	1	1	1	1	1	1	4	1	3	1	1	1	1	1
1837	1	0	1	1	1	1	1	11	1	1	4	4	17.1875	1	3	1	3	2	2	2	1	1	2	4	1	1	1	1	1	3	1
1838	3	0	1	1	1	1	1	37	3	1	3	3	19.2894	2	3	3	2	1	1	1	1	1	1	4	1	4	1	1	1	2	1
1839	1	0	1	1	1	1	1	37	3	1	4	4	22.68	2	1	1	2	2	2	2	1	1	2	4	1	1	1	1	1	3	1
1840	2	0	1	1	1	1	1	24	1	1	3	3	24.0346	3	2	2	3	1	2	1	1	1	1	4	1	3	1	1	1	1	1
1841	3	0	1	1	1	1	1	26	2	1	3	2	20.83	2	2	4	2	1	1	1	1	1	1	4	1	3	1	1	1	1	1
1842	1	0	1	1	1	1	1	23	1	1	4	4	18.75	2	2	3	1	1	2	2	1	1	1	4	1	2	1	1	1	3	1
1843	3	0	1	1	1	1	1	21	1	1	2	2	17.7999	1	2	3	1	2	2	1	1	1	1	1	1	2	1	1	1	1	1
1844	3	2	1	2	1	1	1	35	3	1	2	2	24.0346	3	3	3	2	2	1	1	1	1	1	1	1	2	1	1	1	1	1
1845	2	0	2	1	1	2	1	22	1	1	3	3	24.0346	3	3	3	2	1	1	2	1	1	1	1	1	3	1	1	1	1	1
1846	1	0	1	1	1	1	1	21	1	1	2	2	20.7031	2	3	3	5	1	2	1	1	1	1	2	1	4	1	1	1	2	1
1847	1	0	1	1	1	1	1	31	2	1	4	4	22.0317	2	3	1	2	1	1	2	1	1	2	4	2	1	1	1	1	3	1
1848	3	0	1	1	1	1	1	28	2	1	2	2	24.0346	3	2	4	2	2	1	1	1	1	1	1		2	1	1	1	1	1
1849	3	0	2	1	1	1	1	25	1	1	4	4	18.3594	1	3	3	3	2	2	1	1	1	2	1	1	2	1	1	1	3	1
1850	3	0	1	1	1	1	1	20	1	1	2	3	29.6158	3	4	4	2	2	1	1	1	1	2	4	1	3	1	1	1	1	1
1851	3	0	1	1	1	1	1	19	1	1	2	2	21.0077	2	3	3	4	2	2	2	1	1	1	3	1	3	1	1	1	1	1
1852	3	1	2	1	2	1	1	20	1	1	3	3	18.5078	2	3	3	1	1	2	1	1	1	1	4	1	4	1	1	1	2	1
1853	1	0	1	1	1	1	1	24	1	1	4	4	20.3125	2	2	3	4	1	2	2	1	1	1	4	1	2	1	1	1	3	1
1854	3	0	1	1	1	1	1	27	2	1	4	4	20.202	2	2	2	1	2	2	1	1	1	1	3	1	3	1	1	1	3	1
1855	3	0	1	1	1	1	1	29	2	1	2	2	24.8358	3	2	3	2	2	1	1	1	1	1	3	1	2	1	1	1	1	1
1856	3	0	1	1	1	2	1	21	1	1	2	2	21.4844	2	2	3	1	2	2	1	1	1	1	2	1	3	1	1	1	1	1
1857	3	0	1	1	1	1	1	23	1	1	2	2	19.9219	2	4	4	1	1	2	1	1	1	2	4	1	3	1	1	1	1	1
1858	3	0	1	1	1	1	1	33	2	1	1	3	17.0562	1	2	2	1	2	2	1	1	1	2	4	1	4	1	1	1	2	1
1859	2	0	1	1	1	1	2	14	1	1	2	4	20.0288	2	2	1	3	1	2	2	1	1	1	2	1	3	1	1	1	1	1
1860	2	0	1	1	1	1	1	13	1	1	4	4	20.5457	2	1	1	1	1	2	2	1	1	1	4	1	1	1	1	1	3	1
1861	3	0	1	1	1	1	1	33	2	1	3	3	21.1927	2	2	4	3	2	1	1	1	1	1	4	1	4	1	1	1	2	1
1862	1	0	1	1	1	1	1	24	1	1	4	2	21.4844	2	3	3	2	1	2	2	1	1	1	4	1	2	1	1	1	3	1
1863	3	0	1	1	1	1	1	38	3	2	1	2	19.5717	2	4	4	4	1	1	2	1	1	2	4	1	1	1	1	1	1	1
1864	3	0	1	1	1	1	1	18	1	1	4	4	19.9792	2	2	1	2	2	2	2	1	1	1	3	1	3	1	1	1	3	1
1865	3	0	1	1	1	1	1	33	2	1	3	4	21.0303	2	3	3	2	2	1	1	1	1	1	4		3	1	1	1	1	1
1866	1	0	1	1	1	1	1	17	1	1	4	3	24.974	3	3	1	4	1	1	1	1	1	2	4	1	4	1	1	1	4	1
1867	2	0	1	1	1	1	1	19	1	1	4	4	20.1951	2	1	1	3	1	2	2	1	1	2	4	1	1	1	1	1	3	1
1868	3	0	1	1	1	1	1	33	2	1	2	2	23.4375	2	3	3	3	2	2	1	1	1	2	1	1	2	1	1	1	1	1
1869	3	0	1	1	1	1	1	17	1	1	1	3	20.5693	2	3	2	4	1	1	1	1	1	2	4	1	3	1	1	1	1	1
1870	3	0	1	1	1	1	1	32	2	1	2	3	23.4375	2	3	3	2	1	1	1	1	1	2	4	1	3	1	1	1	1	1
1871	3	0	1	1	1	1	2	35	3	1	3	4	20.1951	2	1	2	2	2	1	1	1	1	2	4	1	3	1	1	1	1	1
1872	3	0	1	1	1	1	1	32	2	1	2	2	21.3382	2	3	3	3	1	1	2	1	1	1	4	1	3	1	1	1	1	1
1873	3	0	1	1	1	1	1	31	2	1	2	2	28.0404	3	4	4	4	2	1	1	1	1	1	1	1	1	1	1	1	1	1
1874	3	0	1	1	1	1	1	27	2	1	2	2	32.6332	3	3	3	3	1	2	2	1	1	1	4	1	3	1	1	1	1	1
1875	1	0	1	1	1	1	1	24	1	1	2	2	25.3906	3	3	3	5	1	1	1	1	1	1	3	1	3	1	1	1	1	1
1876	3	0	1	1	1	1	1	26	2	1	3	3	15.427	1	4	4	2	2	1	1	1	1	1	4		4	1	1	1	2	1
1877	3	0	1	1	1	1	1	31	2	1	3	4	19.7239	2	2	4	1	2	2	1	1	1	2	4	1	3	1	1	1	1	1
1878	1	0	1	1	1	1	1	27	2	1	2	2	19.052	2	4	3	5	1	1	1	1	1	1	2	1	3	1	1	1	1	1
1879	3	0	1	1	1	1	1	26	2	1	2	2	27.3438	3	2	3	2	2	1	1	1	1	1	1	1	2	1	1	1	1	1
1880	3	0	1	1	1	2	1	34	2	1	4	4	20.1348	2	3	2	2	2	1	1	1	1	1	1	1	3	1	1	1	3	2
1881	3	0	2	1	1	1	1	25	1	1	3	4	22.8928	2	3	3	3	1	1	2	1	1	1	2		2	1	1	1	1	1
1882	3	0	1	1	1	1	2	30	2	1	2	2	20.9566	2	3	3	3	1	1	1	1	1	2	4	1	3	1	1	1	1	1
1883	2	0	1	1	1	1	1	30	2	1	4	4	21.6441	2	2	3	2	1	1	2	1	1	2	4	1	3	1	1	1	3	1
1884	3	0	1	1	1	1	2	28	2	1	2	3	21.0772	2	4	4	2	1	1	1	1	1	2	4	1	3	1	1	1	1	1
1885	3	0	1	1	1	1	1	33	2	1	2	2	21.2279	2	4	4	2	1	1	1	1	1	1	4	1	3	1	1	1	1	1
1886	1	2	1	2	1	1	1	27	2	1	3	2	22.8624	2	4	3	2	1	1	1	1	1	1	4	1	2	1	1	1	1	1
1887	3	0	1	1	1	1	1	29	2	1	4	3	19.8791	2	3	4	4	2	1	1	1	1	1	1	1	3	1	1	1	3	1
1888	1	0	1	1	1	1	1	24	1	1	3	4	18.1641	1	2	3	2	2	2	1	1	1	1	4	1	2	1	1	1	1	1
1889	3	0	1	1	1	1	1	23	1	1	2	3	19.313	2	4	4	1	2	2	1	1	1	2	4	1	3	1	1	1	1	1
1890	3	0	1	1	1	1	1	27	2	1	2	2	19.563	2	2	3	3	2	1	1	1	1	1	2	1	2	1	1	1	1	1
1891	1	0	1	1	1	1	1	17	1	1	1	4	21.4844	2	2	2	3	1	2	1	1	1	1	4	1	1	1	1	1	1	1
1892	1	0	1	1	1	1	1	33	2	1	4	3	21.6311	2	3	3	4	1	1	2	1	1	1	4	1	3	1	1	1	3	1
1893	3	0	1	1	1	1	1	24	1	1	2	2	29.1363	3	3	3	2	2	1	1	1	1	2	1	1	2	1	1	1	1	1
1894	3	0	1	1	1	1	1	28	2	1	2	2	21.6413	2	2	3	1	2	2	1	1	1	1	1	1	2	1	1	1	1	1
1895	1	0	1	1	1	1	1	19	1	1	1	2	18.4202	1	3	3	2	1	1	2	1	1	1	2	1	2	1	1	1	1	1
1896	1	0	1	1	1	1	1	19	1	1	1	1	21.9261	2	3	3	3	2	2	1	1	1	2	1	1	5	1	1	1	2	1
1897	3	0	1	1	1	1	1	31	2	1	2	3	21.3675	2	4	4	2	1	1	1	1	1	2	4		4	1	1	1	2	1
1898	3	0	1	1	1	1	1	23	1	1	2	2	19.9792	2	3	3	2	2	1	2	1	1	1	1		4	1	1	1	2	1
1899	3	0	1	1	1	1	2	18	1	1	3	3	22.4766	2	4	4	3	2	2	1	1	1	1	1		2	1	1	1	1	1
1900	1	0	1	1	1	1	1	15	1	1	4	4	18.7305	2	2	1	1	1	2	2	1	1	1	4	1	1	1	1	1	3	1
1901	3	0	1	1	1	1	2	20	1	1	2	2	19.487	2	4	4	2	1	1	1	1	1	1	4	1	3	1	1	1	1	1
1902	1	0	1	1	1	1	1	34	2	1	1	2	18.591	2	2	3	5	1	1	1	1	1	1	4	1	1	1	1	1	1	1
1903	3	0	1	1	1	1	1	28	2	1	2	3	21.4536	2	2	4	1	2	2	2	1	1	1	4		4	1	1	1	2	1
1904	3	0	1	1	1	1	1	24	1	1	3	3	19.1001	2	2	4	2	2	1	1	1	1	1	2	1	2	1	1	1	1	1
1905	3	0	1	1	1	1	1	27	2	1	4	4	22.6409	2	3	3	3	2	1	1	1	1	1	4		3	1	1	1	3	1
1906	2	0	1	1	1	1	2	36	3	1	2	2	24.6548	3	3	3	4	1	1	1	1	1	1	4	2	4	2	1	1	2	1
1907	1	0	1	1	1	1	1	22	1	1	2	2	25.5937	3	3	3	5	1	1	1	1	1	1	4	1	3	1	1	1	1	1
1908	1	0	1	1	1	1	1	13	1	1	3	3	16.5289	1	2	2	1	2	2	2	2	1	2	4	1	1	1	1	1	1	1
1909	1	0	1	1	1	2	1	41	3	1	1	1	28.764	3	4	3	4	1	1	1	1	1	1	4	1	1	1	2	1	1	1
1910	3	0	1	1	1	1	1	31	2	1	2	3	23.2335	2	4	4	3	2	1	1	1	1	2	4	1	3	1	1	1	1	1
1911	3	0	2	1	1	1	1	35	3	1	4	4	21.3382	2	2	2	2	2	1	1	1	1	1	1	1	2	1	1	1	3	2
1912	3	0	1	1	1	1	2	31	2	1	2	2	26.8386	3	4	4	4	2	1	1	1	1	2	1	1	2	1	1	1	1	1
1913	3	0	1	1	1	1	1	35	3	1	2	2	26.1427	3	4	4	2	1	1	1	1	1	1	1	1	2	1	1	1	1	1
1914	3	0	1	1	1	1	2	41	3	1	1	1	24.6548	3	4	1	4	2	1	1	1	1	2	1	1	1	2	1	1	1	1
1915	3	0	1	1	1	1	1	26	2	1	2	2	23.3726	2	3	3	4	2	1	1	1	1	1	1	1	2	1	1	1	1	1
1916	3	0	1	1	1	1	1	24	1	1	2	3	23.5556	2	1	3	3	1	2	1	1	1	1	4	1	3	1	1	1	1	1
1917	1	0	1	1	1	1	1	25	1	1	2	2	25.6369	3	3	3	5	1	1	1	1	1	1	3	1	4	1	1	1	2	1
1918	1	0	1	1	1	1	1	22	1	1	2	2	18.369	1	4	3	1	1	2	1	2	1	1	4	1	1	1	1	1	1	1
1919	3	0	2	1	1	1	1	36	3	1	2	2	22.5069	2	3	3	4	2	1	1	1	1	1	3	1	3	1	1	1	1	1
1920	2	0	1	1	1	1	1	33	2	2	2	2	22.9421	2	3	3	3	1	1	1	1	1	2	4	1	2	1	1	1	1	1
1921	2	0	1	1	1	1	1	23	1	1	3	3	20.4294	2	2	3	3	1	2	1	1	1	1	4	1	1	1	1	1	1	1
1922	2	0	1	1	1	1	1	27	2	1	3	3	23.3377	2	3	3	3	1	2	2	1	1	1	4	1	2	1	1	1	1	1
1923	2	0	2	1	1	1	1	20	1	2	3	2	19.6283	2	3	2	1	1	2	2	1	1	1	4	1	2	1	1	2	1	1
1924	3	0	1	1	1	1	2	40	3	2	1	2	20.3954	2	4	3	2	1	1	1	1	1	1	4	1	3	1	1	1	1	2
1925	2	0	1	1	1	1	1	30	2	1	4	2	21.3593	2	3	1	2	1	1	2	1	1	2	4	1	1	1	1	1	3	1
1926	3	0	1	1	1	1	1	29	2	1	2	2	21.4844	2	3	4	4	1	1	1	1	1	2	1	1	2	1	1	1	1	1
1927	2	0	1	1	1	1	1	29	2	1	4	3	21.6441	2	2	2	4	1	1	2	1	1	2	4	1	3	1	1	1	3	1
1928	1	0	1	1	1	1	1	40	3	1	4	4	21.3675	2	1	1	2	1	1	2	1	1	2	4	1	3	1	1	1	3	1
1929	1	0	1	1	1	1	1	17	1	1	4	4	21.7555	2	1	1	1	1	2	2	1	1	2	4	1	1	1	1	1	3	1
1930	3	0	1	1	1	1	1	18	1	1	2	2	23.4375	2	4	4	1	1	2	1	1	1	2	4		3	1	1	1	1	1
1931	1	0	1	1	1	1	1	16	1	1	4	4	17.5781	1	3	1	3	2	2	2	1	1	1	4	1	4	1	1	1	4	1
1932	3	0	1	1	1	1	1	16	1	1	4	4	20.9572	2	3	1	3	2	2	1	1	1	1	1		3	1	1	1	3	1
1933	3	0	1	1	1	1	1	27	2	1	2	2	22.151	2	4	4	4	1	1	1	1	1	2	4	1	3	1	1	1	1	1
1934	2	0	1	1	1	1	1	24	1	1	3	3	17.9418	1	3	3	4	2	1	1	1	1	1	4	1	1	1	1	1	1	1
1935	1	0	1	1	1	1	1	24	1	1	4	4	18.7305	2	2	3	1	1	2	1	1	1	1	4	1	2	1	1	1	3	1
1936	3	0	1	1	1	1	2	32	2	1	2	2	22.0386	2	4	4	4	1	1	1	1	1	1	4		4	1	1	1	2	1
1937	3	0	1	1	1	1	1	30	2	1	4	4	24.0346	3	3	3	1	2	2	1	1	1	1	1	1	2	1	1	1	3	1
1938	3	0	1	1	1	1	1	31	2	1	2	2	18.026	1	2	3	2	2	1	1	1	1	1	2	1	3	1	1	1	1	1
1939	3	1	1	1	2	1	1	20	1	1	3	3	20.4294	2	2	4	1	2	2	1	1	1	2	4	1	3	1	1	1	1	1
1940	3	0	1	1	1	2	1	24	1	1	2	2	24.3418	3	4	4	4	1	1	1	1	1	1	4	1	3	1	1	1	1	1
1941	2	0	1	1	1	1	1	28	2	1	4	4	22.6667	2	3	2	2	1	1	2	1	1	1	4	1	3	1	1	1	3	1
1942	3	0	1	1	1	1	1	31	2	1	2	2	19.1406	2	4	4	3	1	1	1	1	1	1	4		3	1	1	1	1	1
1943	2	0	1	1	1	1	1	30	2	1	2	3	21.7778	2	3	3	4	1	2	1	1	1	1	4	1	3	1	1	1	1	1
1944	3	0	2	1	1	1	1	31	2	1	2	2	23.4375	2	4	3	3	1	1	2	1	1	2	3	1	2	1	1	1	1	1
1945	3	0	1	1	1	1	1	29	2	1	4	4	22.0604	2	2	2	2	1	2	2	1	1	1	4	1	2	1	1	1	3	1
1946	1	0	1	1	1	1	1	34	2	1	2	2	22.2656	2	3	3	3	2	1	1	1	1	1	4	2	2	1	1	1	1	1
1947	3	0	2	1	1	1	1	20	1	1	2	2	16	1	2	3	2	2	1	1	1	1	1	3	1	2	1	1	1	1	1
1948	2	0	1	1	1	1	2	24	1	1	2	2	26.0375	3	2	4	4	2	1	1	1	1	1	4	1	2	1	2	1	1	1
1949	1	0	1	1	1	1	1	11	1	1	4	4	19.6506	2	2	1	3	1	2	1	1	1	2	4	1	1	1	1	1	3	1
1950	2	0	1	1	1	1	1	26	2	1	4	4	19.0677	2	1	2	3	1	2	2	1	1	2	4	1	2	1	1	1	3	1
1951	1	0	1	1	1	1	1	28	2	1	4	4	21.2183	2	3	2	1	1	2			1	1		1	2	2	1	1	3	1
1952	3	0	1	1	1	1	1	20	1	1	2	2	22.2656	2	4	4	1	1	2	1	1	1	2	4	1	3	1	1	1	1	1
1953	3	0	1	1	1	1	1	25	1	1	2	2	19.7239	2	3	3	3	2	2	1	1	1	1	4	1	3	1	1	1	1	1
1954	2	0	1	1	1	1	1	17	1	1	4	4	20.5457	2	1	1	1	1	2	2	1	1	2	4	1	3	1	1	1	3	1
1955	3	0	1	1	1	1	1	29	2	1	3	4	21.9899	2	2	3	3	1	1	1	1	1	1	4	1	4	1	1	1	2	1
1956	3	0	1	1	1	1	1	32	2	1	2	2	26.9274	3	3	3	3	1	1	1	1	1	2	1	1	2	1	1	1	1	1
1957	3	0	1	1	1	1	1	37	3	1	1	2	25.4767	3	3	3	3	1	1	1	1	1	1	4	1	3	1	1	1	1	1
1958	3	0	1	1	1	1	1	26	2	1	2	2	23.4224	2	3	3	3	1	2	1	1	1	1	4	1	3	1	1	1	1	1
1959	2	0	1	1	1	1	1	29	2	1	3	3	19.563	2	3	3	2	1	1	2	1	1	1	4	1	4	1	1	1	2	1
1960	1	0	1	1	1	1	1	21	1	1	2	2	19.8347	2	3	3	1	1	2	1	1	1	1	4	1	3	1	1	1	1	1
1961	3	0	1	1	1	1	1	20	1	1	2	2	22.8329	2	2	3	2	2	2	1	1	1	1	3		1	1	1	1	1	1
1962	2	0	1	1	1	1	1	24	1	2	4	4	19.052	2	3	3	1	1	2	2	1	1	1	4	1	2	1	1	1	3	1
1963	1	0	1	1	1	1	1	33	2	2	4	4	19.1001	2	1	1	3	2	1		1	1	1	4	1	1	1	1	1	3	1
1964	1	0	1	1	1	1	1	17	1	1	4	4	16.4237	1	2	1	1	2	2	1	1	1	1	4	1	3	1	1	1	3	1
1965	3	0	1	1	1	1	1	23	1	1	2	3	18.7305	2	3	3	3	2	1	2	1	1	2	4	1	4	1	1	1	2	1
1966	1	0	1	1	1	1	1	11	1	1	4	2	18.9036	2	3	1	1	2	2	1	1	1	2	4	1	3	1	1	1	3	1
1967	3	0	1	1	1	1	1	25	1	1	3	2	26.1719	3	3	3	2	2	2	1	1	1	1	4	1	3	1	1	1	1	1
1968	3	0	1	1	1	1	1	34	2	1	3	3	19.1467	2	3	3	2	2	1	1	1	1	1	1	1	2	1	1	1	1	1
1969	1	0	2	1	1	1	1	28	2	1	4	3	18.2563	1	2	2	2	1	1	1	1	1	2	1	1	2	1	1	1	3	1
1970	1	0	2	1	1	1	1	29	2	1	3	2	20.5457	2	3	3	4	1	1	2	1	1	1	1	1	3	1	1	1	1	1
1971	1	0	1	1	1	1	1	24	1	1	2	2	19.7239	2	3	3	3	1	1	1	1	1	1	4	1	1	1	1	1	1	1
1972	3	1	1	1	2	1	1	24	1	1	2	2	21.6311	2	2	4	3	1	1	1	1	1	1	4	1	3	1	1	1	1	1
1973	1	0	1	1	1	1	1	30	2	1	2	2	21.6041	2	3	3	3	1	1		1	1	1	4	1	2	1	1	1	1	1
1974	3	0	1	1	1	1	1	32	2	1	2	2	20.5457	2	3	3	1	1	1	1	1	1	1	4		3	1	1	1	1	1
1975	1	0	1	1	1	1	1	33	2	1	2	2	46.875	3	3	3	2	2	1	2	1	1	2	1	1	2	1	1	1	1	1
1976	3	0	1	1	1	2	1	16	1	1	3	3	21.6311	2	2	2	3	1	1	2	1	1	2	3	1	1	1	1	1	1	1
1977	1	0	1	1	1	1	1	13	1	1	4	4	21.4844	2	2	1	1	1	2	2	1	1	2	1	1	3	1	1	1	3	1
1978	3	0	1	1	1	1	1	35	3	1	3	3	17.4747	1	3	4	4	2	1	1	1	1	1	1	1	2	1	1	1	1	1
1979	3	0	1	1	1	1	1	25	1	1	2	3	19.2277	2	2	3	2	2	1	1	1	1	1	1		2	1	1	1	1	1
1980	3	0	1	1	1	1	2	24	1	1	2	2	20.2848	2	4	4	2	1	1	1	1	1	2	4	1	3	1	1	1	1	1
1981	3	0	1	1	1	1	1	20	1	1	2	2	23.1377	2	2	3	1	2	2	1	1	1	1	1		2	1	1	1	1	1
1982	3	0	1	1	1	1	1	38	3	1	3	3	19.1406	2	3	3	4	1	1	1	1	1	1	4	1	4	1	1	1	2	1
1983	3	0	1	1	1	1	2	24	1	1	2	2	22.6562	2	3	3	4	2	1	1	1	1	1	4		3	1	1	1	1	1
1984	1	0	1	1	1	1	1	19	1	2	4	4	22.719	2	1	1	2	1	1	2	1	1	2	4	1	4	1	1	1	4	1
1985	3	0	1	1	1	1	1	18	1	1	4	4	22.4766	2	3	1	1	2	2	1	1	1	2	1	1	3	1	1	1	3	1
1986	3	0	1	1	1	1	1	16	1	1	4	4	26.0375	3	2	1	2	2	1	1	1	1	2	4	1	4	1	1	1	4	1
1987	1	0	1	1	1	1	1	26	2	1	2	2	20.5688	2	2	2	4	1	1	1	1	1	2	4	1	3	1	1	1	1	1
1988	3	0	1	1	1	1	1	19	1	1	2	2	17.301	1	1	4	4	1	2	1	1	1	1	4	1	3	1	1	1	1	1
1989	3	0	1	1	1	1	1	32	2	1	4	4	18.5178	2	2	2	2	1	1	1	1	1	1	1		2	1	1	1	3	1
1990	3	0	2	1	1	1	1	31	2	1	2	3	17.898	1	4	4	3	1	1	1	1	1	1	4	1	3	1	1	1	1	1
1991	2	0	1	1	1	1	1	24	1	1	2	2	19.1001	2	2	3	1	1	2	1	1	1	1	4	1	1	1	1	1	1	1
1992	1	0	1	1	1	1	1	29	2	1	2	4	24.2439	3	2	3	1	1	2	2	1	1	1	4	1	2	1	1	1	1	1
1993	1	0	1	1	1	1	1	18	1	1	2	3	19.8791	2	3	3	1	1	2	1	1	1	1	2	1	2	1	1	1	1	1
1994	2	0	1	1	1	1	1	11	1	1	1	2	17.7778	1	2	2	1	1	2	1	1	1	2	4	1	1	1	1	1	1	1
1995	3	2	1	2	1	1	1	31	2	1	4	4	20.7967	2	3	3	2	1	1	1	1	1	1	4	1	4	1	1	1	4	1
1996	3	0	1	1	1	1	1	30	2	1	4	4	19.5312	2	3	3	3	1	1	1	1	1	1	4	1	4	1	1	1	4	1
1997	1	0	1	1	1	1	2	26	2	1	4	4	20.83	2	2	2	1	1	2	2	1	1	1	4	1	2	1	1	1	3	1
1998	3	0	1	1	1	1	1	22	1	1	3	3	20.6852	2	1	3	3	1	2	1	1	1	1	4		2	1	1	2	1	1
1999	3	0	1	1	1	1	1	27	2	2	3	3	20.7031	2	3	3	4	2	1	1	1	1	1	2	1	1	1	1	1	1	1
[truncated: 3,869 more rows]
